# Supplementary material
Source: publisher figshare collection journal article supplement (https://acs.figshare.com/ndownloader/files/4933372)
Supplement: Supplementary file 1 [file 4933372]

## Sheet: Cover
In-depth Proteomic Quantification of Cell Secretome in Serum-Containing Conditioned Medium Yejing Weng†,‡, Zhigang Sui†, Yichu Shan†, Hao Jiang†,‡, Yuan Zhou†, Xudong Zhu†,‡, Zhen Liang†, Lihua Zhang†,* and Yukui Zhang† †Key Lab of Separation Sciences for Analytical Chemistry, National Chromatographic R. & A. Center, Dalian Institute of Chemical Physics, Chinese Academy of Sciences, Dalian 116023…
Supplementary Dataset 5

## Sheet: cellular proteome quantificatio
Accession	Description	GENE	Normalization1	Normalization2	Normalization3	RATIO COUNT1	RATIO COUNT2	RATIO COUNT3
A0AV96-2	Isoform 2 of RNA-binding protein 47 OS=Homo sapiens GN=RBM47 - [RBM47_HUMAN]	RBM47	1.2999	1.33701	1.10676	10	10	13
A0AVT1	Ubiquitin-like modifier-activating enzyme 6 OS=Homo sapiens GN=UBA6 PE=1 SV=1 - [UBA6_HUMAN]	UBA6	0.671166	0.859175	1.03174	5	6	5
A0FGR8-2	Isoform 2 of Extended synaptotagmin-2 OS=Homo sapiens GN=ESYT2 - [ESYT2_HUMAN]	ESYT2	0.895376	0.888952	0.845695	7	7	5
A0MZ66-5	Isoform 5 of Shootin-1 OS=Homo sapiens GN=KIAA1598 - [SHOT1_HUMAN]	KIAA1598	1.06761	0.844694	0.937784	5	5	4
A1L0T0	Acetolactate synthase-like protein OS=Homo sapiens GN=ILVBL PE=1 SV=2 - [ILVBL_HUMAN]	ILVBL	1.20243	1.15626	1.31751	6	7	4
A3KN83-3	Isoform 3 of Protein strawberry notch homolog 1 OS=Homo sapiens GN=SBNO1 - [SBNO1_HUMAN]	SBNO1	0.638919	1.10209	0.674473	5	3	4
A4D1E9-2	Isoform 2 of GTP-binding protein 10 OS=Homo sapiens GN=GTPBP10 - [GTPBA_HUMAN]	GTPBP10	0.87717		1.26515	2		2
A5PLL7-2	Isoform 2 of Transmembrane protein 189 OS=Homo sapiens GN=TMEM189 - [TM189_HUMAN]	TMEM189	0.981629	0.798638	0.789595	2	2	1
A5YKK6	CCR4-NOT transcription complex subunit 1 OS=Homo sapiens GN=CNOT1 PE=1 SV=2 - [CNOT1_HUMAN]	CNOT1		0.976095	1.02286		18	16
A6NDG6	Phosphoglycolate phosphatase OS=Homo sapiens GN=PGP PE=1 SV=1 - [PGP_HUMAN]	PGP	1.35716	1.29423	1.23917	9	8	6
A6NDU8	UPF0600 protein C5orf51 OS=Homo sapiens GN=C5orf51 PE=1 SV=1 - [CE051_HUMAN]	C5orf51	0.680964	1.05543	0.86581	1	1	1
A6NFI3	Zinc finger protein 316 OS=Homo sapiens GN=ZNF316 PE=1 SV=1 - [ZN316_HUMAN]	ZNF316	1.08099	0.965173	1.0706	4	3	3
A6NFN3	RNA binding protein fox-1 homolog 3 OS=Homo sapiens GN=RBFOX3 PE=2 SV=4 - [RFOX3_HUMAN]	RBFOX3	3.22518		3.19726	1		1
A6NHR9-2	Isoform 2 of Structural maintenance of chromosomes flexible hinge domain-containing protein 1 OS=Homo sapiens GN=SMCHD1 - [SMHD1_HUMAN]	SMCHD1	0.849688	0.771948	0.943006	6	8	5
A6NKF9	Putative Golgi pH regulator C OS=Homo sapiens GN=GPR89C PE=5 SV=2 - [GPHRC_HUMAN]	GPR89C	0.672228	0.864265	0.617865	2	1	2
A6QL63-2	Isoform 2 of Ankyrin repeat and BTB/POZ domain-containing protein BTBD11 OS=Homo sapiens GN=BTBD11 - [BTBDB_HUMAN]	BTBD11	0.857925	0.855582	0.829653	2	2	2
A7E2V4-2	Isoform 2 of Zinc finger SWIM domain-containing protein 8 OS=Homo sapiens GN=ZSWIM8 - [ZSWM8_HUMAN]	ZSWIM8	0.827838	1.10879	0.79856	1	1	1
A8CG34-2	Isoform 2 of Nuclear envelope pore membrane protein POM 121C OS=Homo sapiens GN=POM121C - [P121C_HUMAN]	POM121C	1.02692	0.915469	1.06587	3	4	3
A8MWD9	Putative small nuclear ribonucleoprotein G-like protein 15 OS=Homo sapiens GN=SNRPGP15 PE=5 SV=2 - [RUXGL_HUMAN]	SNRPGP15	1.05052	1.02187	1.07618	1	1	1
A8MXV4	Nucleoside diphosphate-linked moiety X motif 19, mitochondrial OS=Homo sapiens GN=NUDT19 PE=1 SV=1 - [NUD19_HUMAN]	NUDT19	1.5802	1.57353	1.58916	4	6	5
C4AMC7	Putative WAS protein family homolog 3 OS=Homo sapiens GN=WASH3P PE=1 SV=2 - [WASH3_HUMAN]	WASH3P		0.891598	0.614734		1	1
C9JLW8	Protein FAM195B OS=Homo sapiens GN=FAM195B PE=1 SV=1 - [F195B_HUMAN]	FAM195B
E9PRG8	Uncharacterized protein C11orf98 OS=Homo sapiens GN=C11orf98 PE=4 SV=1 - [CK098_HUMAN]	C11orf98	1.07598		1.15117	1		1
O00115-2	Isoform 2 of Deoxyribonuclease-2-alpha OS=Homo sapiens GN=DNASE2 - [DNS2A_HUMAN]	DNASE2	1.08316	1.13064	1.28708	3	4	5
O00116	Alkyldihydroxyacetonephosphate synthase, peroxisomal OS=Homo sapiens GN=AGPS PE=1 SV=1 - [ADAS_HUMAN]	AGPS	0.934416	0.986145	1.03916	15	14	16
O00139-2	Isoform 2 of Kinesin-like protein KIF2A OS=Homo sapiens GN=KIF2A - [KIF2A_HUMAN]	KIF2A	1.03315	0.905236	0.853049	3	5	4
O00148	ATP-dependent RNA helicase DDX39A OS=Homo sapiens GN=DDX39A PE=1 SV=2 - [DX39A_HUMAN]	DDX39A	1.244	1.12429	1.23341	11	8	7
O00151	PDZ and LIM domain protein 1 OS=Homo sapiens GN=PDLIM1 PE=1 SV=4 - [PDLI1_HUMAN]	PDLIM1	0.852701	0.882995	0.839135	23	21	23
O00154-4	Isoform 4 of Cytosolic acyl coenzyme A thioester hydrolase OS=Homo sapiens GN=ACOT7 - [BACH_HUMAN]	ACOT7		0.845077	0.81028		9	5
O00159-2	Isoform 2 of Unconventional myosin-Ic OS=Homo sapiens GN=MYO1C - [MYO1C_HUMAN]	MYO1C	1.25961		1.19934	40		43
O00161	Synaptosomal-associated protein 23 OS=Homo sapiens GN=SNAP23 PE=1 SV=1 - [SNP23_HUMAN]	SNAP23	0.865331	0.802406	0.749908	5	6	6
O00165-5	Isoform 5 of HCLS1-associated protein X-1 OS=Homo sapiens GN=HAX1 - [HAX1_HUMAN]	HAX1	0.91367	0.75871	0.97994	7	6	6
O00170	AH receptor-interacting protein OS=Homo sapiens GN=AIP PE=1 SV=2 - [AIP_HUMAN]	AIP	0.734174	0.8166	0.756305	7	8	7
O00178	GTP-binding protein 1 OS=Homo sapiens GN=GTPBP1 PE=1 SV=3 - [GTPB1_HUMAN]	GTPBP1	0.741194	0.920833	1.00286	1	1	2
O00186	Syntaxin-binding protein 3 OS=Homo sapiens GN=STXBP3 PE=1 SV=2 - [STXB3_HUMAN]	STXBP3	1.38152	1.42486	1.05963	5	6	6
O00193	Small acidic protein OS=Homo sapiens GN=SMAP PE=1 SV=1 - [SMAP_HUMAN]	SMAP	0.968246	0.923066	1.02812	2	3	5
O00194	Ras-related protein Rab-27B OS=Homo sapiens GN=RAB27B PE=1 SV=4 - [RB27B_HUMAN]	RAB27B	2.02303	2.07861	2.60277	2	1	2
O00203-3	Isoform 2 of AP-3 complex subunit beta-1 OS=Homo sapiens GN=AP3B1 - [AP3B1_HUMAN]	AP3B1	0.775584		0.967901	4		8
O00217	NADH dehydrogenase [ubiquinone] iron-sulfur protein 8, mitochondrial OS=Homo sapiens GN=NDUFS8 PE=1 SV=1 - [NDUS8_HUMAN]	NDUFS8	0.929186	0.905588	0.766753	5	3	3
O00231	26S proteasome non-ATPase regulatory subunit 11 OS=Homo sapiens GN=PSMD11 PE=1 SV=3 - [PSD11_HUMAN]	PSMD11	0.993728	1.02026	0.997755	26	27	23
O00232	26S proteasome non-ATPase regulatory subunit 12 OS=Homo sapiens GN=PSMD12 PE=1 SV=3 - [PSD12_HUMAN]	PSMD12	0.962599	0.906466	0.926408	17	15	18
O00233	26S proteasome non-ATPase regulatory subunit 9 OS=Homo sapiens GN=PSMD9 PE=1 SV=3 - [PSMD9_HUMAN]	PSMD9	1.06228	0.958279	1.09246	8	12	8
O00244	Copper transport protein ATOX1 OS=Homo sapiens GN=ATOX1 PE=1 SV=1 - [ATOX1_HUMAN]	ATOX1	0.447448		0.433341	2		2
O00255-3	Isoform 3 of Menin OS=Homo sapiens GN=MEN1 - [MEN1_HUMAN]	MEN1	0.501813		0.587599	1		1
O00264	Membrane-associated progesterone receptor component 1 OS=Homo sapiens GN=PGRMC1 PE=1 SV=3 - [PGRC1_HUMAN]	PGRMC1	1.11032	1.1156	1.15327	2	4	3
O00267-2	Isoform 2 of Transcription elongation factor SPT5 OS=Homo sapiens GN=SUPT5H - [SPT5H_HUMAN]	SUPT5H	1.35798	1.48566	1.44835	19	12	16
O00268	Transcription initiation factor TFIID subunit 4 OS=Homo sapiens GN=TAF4 PE=1 SV=2 - [TAF4_HUMAN]	TAF4			0.848134			2
O00273	DNA fragmentation factor subunit alpha OS=Homo sapiens GN=DFFA PE=1 SV=1 - [DFFA_HUMAN]	DFFA			1.06442			7
O00291-3	Isoform 3 of Huntingtin-interacting protein 1 OS=Homo sapiens GN=HIP1 - [HIP1_HUMAN]	HIP1			0.729642			1
O00299	Chloride intracellular channel protein 1 OS=Homo sapiens GN=CLIC1 PE=1 SV=4 - [CLIC1_HUMAN]	CLIC1	0.974385	0.907317	0.954037	22	21	22
O00303	Eukaryotic translation initiation factor 3 subunit F OS=Homo sapiens GN=EIF3F PE=1 SV=1 - [EIF3F_HUMAN]	EIF3F	0.922884	0.958931	0.929682	13	13	11
O00308-3	Isoform 3 of NEDD4-like E3 ubiquitin-protein ligase WWP2 OS=Homo sapiens GN=WWP2 - [WWP2_HUMAN]	WWP2	1.62182	0.992221	1.00879	1	2	1
O00330-3	Isoform 3 of Pyruvate dehydrogenase protein X component, mitochondrial OS=Homo sapiens GN=PDHX - [ODPX_HUMAN]	PDHX	1.08256	1.12955	1.23843	3	3	3
O00338	Sulfotransferase 1C2 OS=Homo sapiens GN=SULT1C2 PE=1 SV=1 - [ST1C2_HUMAN]	SULT1C2	1.11865	1.08042	1.07079	10	10	9
O00399	Dynactin subunit 6 OS=Homo sapiens GN=DCTN6 PE=1 SV=1 - [DCTN6_HUMAN]	DCTN6
O00401	Neural Wiskott-Aldrich syndrome protein OS=Homo sapiens GN=WASL PE=1 SV=2 - [WASL_HUMAN]	WASL	0.861461	0.88732	1.62399	2	1	1
O00410	Importin-5 OS=Homo sapiens GN=IPO5 PE=1 SV=4 - [IPO5_HUMAN]	IPO5	0.904476	0.942608	0.872204	21	23	26
O00411	DNA-directed RNA polymerase, mitochondrial OS=Homo sapiens GN=POLRMT PE=1 SV=2 - [RPOM_HUMAN]	POLRMT	0.949517	1.1322	1.13983	8	8	6
O00422	Histone deacetylase complex subunit SAP18 OS=Homo sapiens GN=SAP18 PE=1 SV=1 - [SAP18_HUMAN]	SAP18	1.21839	1.2382	1.11403	2	1	2
O00425	Insulin-like growth factor 2 mRNA-binding protein 3 OS=Homo sapiens GN=IGF2BP3 PE=1 SV=2 - [IF2B3_HUMAN]	IGF2BP3	1.25555	1.33327	1.34739	12	13	12
O00429-3	Isoform 2 of Dynamin-1-like protein OS=Homo sapiens GN=DNM1L - [DNM1L_HUMAN]	DNM1L	1.78614	0.888706	0.952617	1	1	2
O00429-4	Isoform 3 of Dynamin-1-like protein OS=Homo sapiens GN=DNM1L - [DNM1L_HUMAN]	DNM1L	0.743427	0.441495	0.780282	2	2	1
O00442	RNA 3'-terminal phosphate cyclase OS=Homo sapiens GN=RTCA PE=1 SV=1 - [RTCA_HUMAN]	RTCA	1.22781	1.1496	1.22828	2	3	4
O00461	Golgi integral membrane protein 4 OS=Homo sapiens GN=GOLIM4 PE=1 SV=1 - [GOLI4_HUMAN]	GOLIM4	0.851335	0.842075	0.815201	7	7	7
O00469	Procollagen-lysine,2-oxoglutarate 5-dioxygenase 2 OS=Homo sapiens GN=PLOD2 PE=1 SV=2 - [PLOD2_HUMAN]	PLOD2	0.919392	0.859726	0.806568	8	9	9
O00471	Exocyst complex component 5 OS=Homo sapiens GN=EXOC5 PE=1 SV=1 - [EXOC5_HUMAN]	EXOC5	5.40926	0.884033		1	1
O00483	Cytochrome c oxidase subunit NDUFA4 OS=Homo sapiens GN=NDUFA4 PE=1 SV=1 - [NDUA4_HUMAN]	NDUFA4	0.952329	1.00469	0.949698	2	2	2
O00487	26S proteasome non-ATPase regulatory subunit 14 OS=Homo sapiens GN=PSMD14 PE=1 SV=1 - [PSDE_HUMAN]	PSMD14	1.04077	1.00576	0.927996	9	12	14
O00488	Zinc finger protein 593 OS=Homo sapiens GN=ZNF593 PE=1 SV=2 - [ZN593_HUMAN]	ZNF593	1.01694	0.859742	0.841565	1	1	1
O00499-9	Isoform BIN1-10-13 of Myc box-dependent-interacting protein 1 OS=Homo sapiens GN=BIN1 - [BIN1_HUMAN]	BIN1	0.90998	0.840737	0.914402	6	6	5
O00505	Importin subunit alpha-4 OS=Homo sapiens GN=KPNA3 PE=1 SV=2 - [IMA4_HUMAN]	KPNA3	1.03203	0.762119	1.00567	1	1	2
O00515	Ladinin-1 OS=Homo sapiens GN=LAD1 PE=1 SV=2 - [LAD1_HUMAN]	LAD1	0.948403	0.927328	0.901554	5	7	8
O00541-2	Isoform 2 of Pescadillo homolog OS=Homo sapiens GN=PES1 - [PESC_HUMAN]	PES1	1.01291	1.12621	1.03026	13	12	8
O00560-2	Isoform 2 of Syntenin-1 OS=Homo sapiens GN=SDCBP - [SDCB1_HUMAN]	SDCBP		1.82654	1.65966		6	5
O00566	U3 small nucleolar ribonucleoprotein protein MPP10 OS=Homo sapiens GN=MPHOSPH10 PE=1 SV=2 - [MPP10_HUMAN]	MPHOSPH10	1.51389	0.97429	0.749502	1	2	3
O00567	Nucleolar protein 56 OS=Homo sapiens GN=NOP56 PE=1 SV=4 - [NOP56_HUMAN]	NOP56	1.07748	1.06547	1.01796	23	25	27
O00571	ATP-dependent RNA helicase DDX3X OS=Homo sapiens GN=DDX3X PE=1 SV=3 - [DDX3X_HUMAN]	DDX3X	1.08927	1.11064	1.11143	17	15	20
O00584	Ribonuclease T2 OS=Homo sapiens GN=RNASET2 PE=1 SV=2 - [RNT2_HUMAN]	RNASET2	0.937558	0.948543	0.909437	2	3	2
O00592-2	Isoform 2 of Podocalyxin OS=Homo sapiens GN=PODXL - [PODXL_HUMAN]	PODXL	1.21644	1.39258	1.16741	1	1	1
O00625	Pirin OS=Homo sapiens GN=PIR PE=1 SV=1 - [PIR_HUMAN]	PIR	0.539754	1.19667	0.758648	3	3	3
O00629	Importin subunit alpha-3 OS=Homo sapiens GN=KPNA4 PE=1 SV=1 - [IMA3_HUMAN]	KPNA4	1.04027	1.03869	1.03994	9	9	7
O00743-2	Isoform 2 of Serine/threonine-protein phosphatase 6 catalytic subunit OS=Homo sapiens GN=PPP6C - [PPP6_HUMAN]	PPP6C	1.0466		0.8889	3		5
O00754-2	Isoform 2 of Lysosomal alpha-mannosidase OS=Homo sapiens GN=MAN2B1 - [MA2B1_HUMAN]	MAN2B1	1.66275	1.34695	1.60246	1	1	1
O00762	Ubiquitin-conjugating enzyme E2 C OS=Homo sapiens GN=UBE2C PE=1 SV=1 - [UBE2C_HUMAN]	UBE2C	1.32751	1.01322	1.72699	4	3	3
O00764	Pyridoxal kinase OS=Homo sapiens GN=PDXK PE=1 SV=1 - [PDXK_HUMAN]	PDXK	1.14937	1.12903	1.09743	10	10	9
O00767	Acyl-CoA desaturase OS=Homo sapiens GN=SCD PE=1 SV=2 - [ACOD_HUMAN]	SCD	0.888076	0.675913		1	1
O14497-3	Isoform 3 of AT-rich interactive domain-containing protein 1A OS=Homo sapiens GN=ARID1A - [ARI1A_HUMAN]	ARID1A	0.80755		0.955858	1		2
O14519-2	Isoform 2 of Cyclin-dependent kinase 2-associated protein 1 OS=Homo sapiens GN=CDK2AP1 - [CDKA1_HUMAN]	CDK2AP1	1.12919	1.02407	1.15608	2	2	2
O14524-2	Isoform 2 of Transmembrane protein 194A OS=Homo sapiens GN=TMEM194A - [T194A_HUMAN]	TMEM194A	1.49224	1.62804	1.33131	1	1	2
O14530-2	Isoform 2 of Thioredoxin domain-containing protein 9 OS=Homo sapiens GN=TXNDC9 - [TXND9_HUMAN]	TXNDC9	0.884975	0.985205	0.781618	1	1	1
O14545-2	Isoform 2 of TRAF-type zinc finger domain-containing protein 1 OS=Homo sapiens GN=TRAFD1 - [TRAD1_HUMAN]	TRAFD1			0.721594			1
O14548	Cytochrome c oxidase subunit 7A-related protein, mitochondrial OS=Homo sapiens GN=COX7A2L PE=1 SV=2 - [COX7R_HUMAN]	COX7A2L	0.796737	1.10402	0.87076	3	2	2
O14561	Acyl carrier protein, mitochondrial OS=Homo sapiens GN=NDUFAB1 PE=1 SV=3 - [ACPM_HUMAN]	NDUFAB1	1.16842	1.33925	1.22781	9	6	6
O14562	Ubiquitin domain-containing protein UBFD1 OS=Homo sapiens GN=UBFD1 PE=1 SV=2 - [UBFD1_HUMAN]	UBFD1	1.16536		0.407182	1		2
O14579	Coatomer subunit epsilon OS=Homo sapiens GN=COPE PE=1 SV=3 - [COPE_HUMAN]	COPE	0.871666	0.903833	0.880776	8	10	10
O14602	Eukaryotic translation initiation factor 1A, Y-chromosomal OS=Homo sapiens GN=EIF1AY PE=1 SV=4 - [IF1AY_HUMAN]	EIF1AY		0.988042	1.07457		4	4
O14617-4	Isoform 4 of AP-3 complex subunit delta-1 OS=Homo sapiens GN=AP3D1 - [AP3D1_HUMAN]	AP3D1		1.02474	1.0141		6	6
O14618	Copper chaperone for superoxide dismutase OS=Homo sapiens GN=CCS PE=1 SV=1 - [CCS_HUMAN]	CCS	0.854453	0.930172	0.677257	2	2	2
O14639-4	Isoform 4 of Actin-binding LIM protein 1 OS=Homo sapiens GN=ABLIM1 - [ABLM1_HUMAN]	ABLIM1	1.06247		1.09354	1		2
O14641	Segment polarity protein dishevelled homolog DVL-2 OS=Homo sapiens GN=DVL2 PE=1 SV=1 - [DVL2_HUMAN]	DVL2	0.937889	1.25333		1	1
O14646-2	Isoform 2 of Chromodomain-helicase-DNA-binding protein 1 OS=Homo sapiens GN=CHD1 - [CHD1_HUMAN]	CHD1	0.729698	0.703225		2	1
O14653	Golgi SNAP receptor complex member 2 OS=Homo sapiens GN=GOSR2 PE=1 SV=2 - [GOSR2_HUMAN]	GOSR2	1.04347		0.939513	2		3
O14656	Torsin-1A OS=Homo sapiens GN=TOR1A PE=1 SV=1 - [TOR1A_HUMAN]	TOR1A	1.38492		1.25892	2		2
O14657	Torsin-1B OS=Homo sapiens GN=TOR1B PE=1 SV=2 - [TOR1B_HUMAN]	TOR1B	0.818121	0.567051	0.613687	5	2	1
O14662-3	Isoform C of Syntaxin-16 OS=Homo sapiens GN=STX16 - [STX16_HUMAN]	STX16			0.805272			1
O14672	Disintegrin and metalloproteinase domain-containing protein 10 OS=Homo sapiens GN=ADAM10 PE=1 SV=1 - [ADA10_HUMAN]	ADAM10	0.776245	0.971436	0.983135	3	2	1
O14681-3	Isoform 2 of Etoposide-induced protein 2.4 homolog OS=Homo sapiens GN=EI24 - [EI24_HUMAN]	EI24			0.937777			1
O14683	Tumor protein p53-inducible protein 11 OS=Homo sapiens GN=TP53I11 PE=1 SV=2 - [P5I11_HUMAN]	TP53I11			0.821633			1
O14732-2	Isoform 2 of Inositol monophosphatase 2 OS=Homo sapiens GN=IMPA2 - [IMPA2_HUMAN]	IMPA2	1.7117	1.42562	1.77206	3	3	3
O14735-3	Isoform 3 of CDP-diacylglycerol--inositol 3-phosphatidyltransferase OS=Homo sapiens GN=CDIPT - [CDIPT_HUMAN]	CDIPT			1.74636			1
O14737	Programmed cell death protein 5 OS=Homo sapiens GN=PDCD5 PE=1 SV=3 - [PDCD5_HUMAN]	PDCD5	1.35243	1.33573	1.32869	6	7	8
O14744	Protein arginine N-methyltransferase 5 OS=Homo sapiens GN=PRMT5 PE=1 SV=4 - [ANM5_HUMAN]	PRMT5	0.778599	0.959312	0.874951	9	11	11
O14745	Na(+)/H(+) exchange regulatory cofactor NHE-RF1 OS=Homo sapiens GN=SLC9A3R1 PE=1 SV=4 - [NHRF1_HUMAN]	SLC9A3R1	0.935217	0.878029	0.96213	12	9	10
O14757-2	Isoform 2 of Serine/threonine-protein kinase Chk1 OS=Homo sapiens GN=CHEK1 - [CHK1_HUMAN]	CHEK1
O14763-2	Isoform Short of Tumor necrosis factor receptor superfamily member 10B OS=Homo sapiens GN=TNFRSF10B - [TR10B_HUMAN]	TNFRSF10B	1.05327	1.1151	1.18129	1	1	1
O14772-2	Isoform 5 of Fucose-1-phosphate guanylyltransferase OS=Homo sapiens GN=FPGT - [FPGT_HUMAN]	FPGT	0.553877	0.387443		1	1
O14773-2	Isoform 2 of Tripeptidyl-peptidase 1 OS=Homo sapiens GN=TPP1 - [TPP1_HUMAN]	TPP1	1.10933	1.21237	1.12492	11	9	13
O14776-2	Isoform 2 of Transcription elongation regulator 1 OS=Homo sapiens GN=TCERG1 - [TCRG1_HUMAN]	TCERG1	1.05734	1.09484	1.08579	11	12	11
O14786-3	Isoform 3 of Neuropilin-1 OS=Homo sapiens GN=NRP1 - [NRP1_HUMAN]	NRP1
O14818	Proteasome subunit alpha type-7 OS=Homo sapiens GN=PSMA7 PE=1 SV=1 - [PSA7_HUMAN]	PSMA7	1.00058	0.94882	1.00541	18	16	18
O14828	Secretory carrier-associated membrane protein 3 OS=Homo sapiens GN=SCAMP3 PE=1 SV=3 - [SCAM3_HUMAN]	SCAMP3	1.13341	1.17822	1.18557	9	12	13
O14841	5-oxoprolinase OS=Homo sapiens GN=OPLAH PE=1 SV=3 - [OPLA_HUMAN]	OPLAH	0.902525	0.834858	0.973144	9	7	8
O14880	Microsomal glutathione S-transferase 3 OS=Homo sapiens GN=MGST3 PE=1 SV=1 - [MGST3_HUMAN]	MGST3	1.13923		1.13344	1		1
O14893-3	Isoform 3 of Gem-associated protein 2 OS=Homo sapiens GN=GEMIN2 - [GEMI2_HUMAN]	GEMIN2
O14907	Tax1-binding protein 3 OS=Homo sapiens GN=TAX1BP3 PE=1 SV=2 - [TX1B3_HUMAN]	TAX1BP3	0.742047	0.986789	1.01835	2	2	2
O14908	PDZ domain-containing protein GIPC1 OS=Homo sapiens GN=GIPC1 PE=1 SV=2 - [GIPC1_HUMAN]	GIPC1		1.23976	1.43142		4	2
O14925	Mitochondrial import inner membrane translocase subunit Tim23 OS=Homo sapiens GN=TIMM23 PE=1 SV=1 - [TIM23_HUMAN]	TIMM23	1.19785	1.88549	1.58838	1	2	1
O14929-2	Isoform B of Histone acetyltransferase type B catalytic subunit OS=Homo sapiens GN=HAT1 - [HAT1_HUMAN]	HAT1			1.36036			2
O14936-3	Isoform 3 of Peripheral plasma membrane protein CASK OS=Homo sapiens GN=CASK - [CSKP_HUMAN]	CASK	1.1874	1.16832	1.07565	15	15	16
O14949	Cytochrome b-c1 complex subunit 8 OS=Homo sapiens GN=UQCRQ PE=1 SV=4 - [QCR8_HUMAN]	UQCRQ	1.39826	1.18787	0.830003	1	5	2
O14964-2	Isoform 2 of Hepatocyte growth factor-regulated tyrosine kinase substrate OS=Homo sapiens GN=HGS - [HGS_HUMAN]	HGS	1.16014	1.13072	1.24006	2	2	2
O14967	Calmegin OS=Homo sapiens GN=CLGN PE=1 SV=1 - [CLGN_HUMAN]	CLGN		0.828128			1
O14972-2	Isoform 2 of Down syndrome critical region protein 3 OS=Homo sapiens GN=DSCR3 - [DSCR3_HUMAN]	DSCR3	0.651476	0.734066	0.57834	3	3	1
O14974-4	Isoform 4 of Protein phosphatase 1 regulatory subunit 12A OS=Homo sapiens GN=PPP1R12A - [MYPT1_HUMAN]	PPP1R12A	0.970164	0.958265	1.08604	12	12	11
O14976-2	Isoform 2 of Cyclin-G-associated kinase OS=Homo sapiens GN=GAK - [GAK_HUMAN]	GAK	0.834599	0.769288	0.773798	2	5	4
O14979-3	Isoform 3 of Heterogeneous nuclear ribonucleoprotein D-like OS=Homo sapiens GN=HNRNPDL - [HNRDL_HUMAN]	HNRNPDL	1.0825	1.05939	1.14386	9	7	10
O14980	Exportin-1 OS=Homo sapiens GN=XPO1 PE=1 SV=1 - [XPO1_HUMAN]	XPO1	1.00379	0.954107	0.975498	25	27	20
O15014	Zinc finger protein 609 OS=Homo sapiens GN=ZNF609 PE=1 SV=2 - [ZN609_HUMAN]	ZNF609	0.96373	0.754015	0.706758	1	2	3
O15027-2	Isoform 2 of Protein transport protein Sec16A OS=Homo sapiens GN=SEC16A - [SC16A_HUMAN]	SEC16A	0.969962	1.04051	0.97642	9	10	11
O15031	Plexin-B2 OS=Homo sapiens GN=PLXNB2 PE=1 SV=3 - [PLXB2_HUMAN]	PLXNB2	0.967364	0.843095	0.946684	2	3	4
O15042-2	Isoform 2 of U2 snRNP-associated SURP motif-containing protein OS=Homo sapiens GN=U2SURP - [SR140_HUMAN]	U2SURP	1.11953	0.915774	1.09068	9	9	7
O15067	Phosphoribosylformylglycinamidine synthase OS=Homo sapiens GN=PFAS PE=1 SV=4 - [PUR4_HUMAN]	PFAS	0.663163	0.656625	0.661635	14	12	14
O15085	Rho guanine nucleotide exchange factor 11 OS=Homo sapiens GN=ARHGEF11 PE=1 SV=1 - [ARHGB_HUMAN]	ARHGEF11	0.683795	0.470388	0.5311	3	1	2
O15111	Inhibitor of nuclear factor kappa-B kinase subunit alpha OS=Homo sapiens GN=CHUK PE=1 SV=2 - [IKKA_HUMAN]	CHUK	0.857733	0.893883	0.978109	1	1	1
O15116	U6 snRNA-associated Sm-like protein LSm1 OS=Homo sapiens GN=LSM1 PE=1 SV=1 - [LSM1_HUMAN]	LSM1	1.08791	0.850582	0.839829	1	2	1
O15118	Niemann-Pick C1 protein OS=Homo sapiens GN=NPC1 PE=1 SV=2 - [NPC1_HUMAN]	NPC1	1.42962	1.16917	1.3999	4	7	4
O15120-2	Isoform 2 of 1-acyl-sn-glycerol-3-phosphate acyltransferase beta OS=Homo sapiens GN=AGPAT2 - [PLCB_HUMAN]	AGPAT2
O15121	Sphingolipid delta(4)-desaturase DES1 OS=Homo sapiens GN=DEGS1 PE=1 SV=1 - [DEGS1_HUMAN]	DEGS1	1.17616	1.25379	0.941265	3	2	2
O15126	Secretory carrier-associated membrane protein 1 OS=Homo sapiens GN=SCAMP1 PE=1 SV=2 - [SCAM1_HUMAN]	SCAMP1	1.24478	0.322369	1.43997	1	1	1
O15127	Secretory carrier-associated membrane protein 2 OS=Homo sapiens GN=SCAMP2 PE=1 SV=2 - [SCAM2_HUMAN]	SCAMP2	1.15608	1.52062		1	3
O15143	Actin-related protein 2/3 complex subunit 1B OS=Homo sapiens GN=ARPC1B PE=1 SV=3 - [ARC1B_HUMAN]	ARPC1B	0.961962	0.976938	0.982876	16	24	23
O15144	Actin-related protein 2/3 complex subunit 2 OS=Homo sapiens GN=ARPC2 PE=1 SV=1 - [ARPC2_HUMAN]	ARPC2	0.962144	1.07262	1.00247	12	11	13
O15145	Actin-related protein 2/3 complex subunit 3 OS=Homo sapiens GN=ARPC3 PE=1 SV=3 - [ARPC3_HUMAN]	ARPC3	0.946817	1.04686	1.00852	7	6	6
O15160-2	Isoform 2 of DNA-directed RNA polymerases I and III subunit RPAC1 OS=Homo sapiens GN=POLR1C - [RPAC1_HUMAN]	POLR1C	0.866971	1.1838	0.87237	6	6	7
O15162-2	Isoform 2 of Phospholipid scramblase 1 OS=Homo sapiens GN=PLSCR1 - [PLS1_HUMAN]	PLSCR1	0.810872	0.912	0.824236	2	1	1
O15173	Membrane-associated progesterone receptor component 2 OS=Homo sapiens GN=PGRMC2 PE=1 SV=1 - [PGRC2_HUMAN]	PGRMC2	0.75677	0.915061	0.88827	2	2	2
O15212	Prefoldin subunit 6 OS=Homo sapiens GN=PFDN6 PE=1 SV=1 - [PFD6_HUMAN]	PFDN6	0.929664	0.948736	1.02516	5	4	8
O15213	WD repeat-containing protein 46 OS=Homo sapiens GN=WDR46 PE=1 SV=3 - [WDR46_HUMAN]	WDR46	1.28282	0.646823	0.670859	3	1	1
O15226	NF-kappa-B-repressing factor OS=Homo sapiens GN=NKRF PE=1 SV=2 - [NKRF_HUMAN]	NKRF	1.01878	1.01077	0.878844	6	7	6
O15228	Dihydroxyacetone phosphate acyltransferase OS=Homo sapiens GN=GNPAT PE=1 SV=1 - [GNPAT_HUMAN]	GNPAT	1.11011		0.978784	1		1
O15235	28S ribosomal protein S12, mitochondrial OS=Homo sapiens GN=MRPS12 PE=1 SV=1 - [RT12_HUMAN]	MRPS12		1.51231	1.37679		1	1
O15247	Chloride intracellular channel protein 2 OS=Homo sapiens GN=CLIC2 PE=1 SV=3 - [CLIC2_HUMAN]	CLIC2			0.523892			1
O15254-2	Isoform 2 of Peroxisomal acyl-coenzyme A oxidase 3 OS=Homo sapiens GN=ACOX3 - [ACOX3_HUMAN]	ACOX3	1.01593		1.28367	1		1
O15258	Protein RER1 OS=Homo sapiens GN=RER1 PE=1 SV=1 - [RER1_HUMAN]	RER1	0.886444	0.866596	0.889254	4	2	4
O15260-2	Isoform 2 of Surfeit locus protein 4 OS=Homo sapiens GN=SURF4 - [SURF4_HUMAN]	SURF4	0.942649	0.979549	0.984754	12	14	13
O15269	Serine palmitoyltransferase 1 OS=Homo sapiens GN=SPTLC1 PE=1 SV=1 - [SPTC1_HUMAN]	SPTLC1	1.05544	1.02307	1.03084	6	9	7
O15294	UDP-N-acetylglucosamine--peptide N-acetylglucosaminyltransferase 110 kDa subunit OS=Homo sapiens GN=OGT PE=1 SV=3 - [OGT1_HUMAN]	OGT	0.703376	0.651106	0.745126	13	9	9
O15305	Phosphomannomutase 2 OS=Homo sapiens GN=PMM2 PE=1 SV=1 - [PMM2_HUMAN]	PMM2	1.17744	1.14714	1.63248	4	4	4
O15320-9	Isoform 10 of cTAGE family member 5 OS=Homo sapiens GN=CTAGE5 - [CTGE5_HUMAN]	CTAGE5	0.986953	0.888158	1.02575	3	6	4
O15347	High mobility group protein B3 OS=Homo sapiens GN=HMGB3 PE=1 SV=4 - [HMGB3_HUMAN]	HMGB3	0.899013	0.951971	0.986521	5	7	5
O15355	Protein phosphatase 1G OS=Homo sapiens GN=PPM1G PE=1 SV=1 - [PPM1G_HUMAN]	PPM1G	1.04504	1.05722	1.05031	13	12	9
O15357	Phosphatidylinositol 3,4,5-trisphosphate 5-phosphatase 2 OS=Homo sapiens GN=INPPL1 PE=1 SV=2 - [SHIP2_HUMAN]	INPPL1
O15371-2	Isoform 2 of Eukaryotic translation initiation factor 3 subunit D OS=Homo sapiens GN=EIF3D - [EIF3D_HUMAN]	EIF3D	0.954593	0.980369	0.954684	16	18	17
O15372	Eukaryotic translation initiation factor 3 subunit H OS=Homo sapiens GN=EIF3H PE=1 SV=1 - [EIF3H_HUMAN]	EIF3H	0.927341	0.938901	0.98428	11	11	10
O15381-2	Isoform 2 of Nuclear valosin-containing protein-like OS=Homo sapiens GN=NVL - [NVL_HUMAN]	NVL	0.809032	0.743569	0.723667	1	1	1
O15382	Branched-chain-amino-acid aminotransferase, mitochondrial OS=Homo sapiens GN=BCAT2 PE=1 SV=2 - [BCAT2_HUMAN]	BCAT2	1.22366	1.29924	1.1975	13	12	12
O15397	Importin-8 OS=Homo sapiens GN=IPO8 PE=1 SV=2 - [IPO8_HUMAN]	IPO8	0.656824	0.958357	1.14141	2	1	1
O15400-2	Isoform 2 of Syntaxin-7 OS=Homo sapiens GN=STX7 - [STX7_HUMAN]	STX7	1.04667	0.984858	1.42116	3	1	3
O15427	Monocarboxylate transporter 4 OS=Homo sapiens GN=SLC16A3 PE=1 SV=1 - [MOT4_HUMAN]	SLC16A3	0.688983	0.74727	0.781883	3	2	2
O15438	Canalicular multispecific organic anion transporter 2 OS=Homo sapiens GN=ABCC3 PE=1 SV=3 - [MRP3_HUMAN]	ABCC3	0.952654	0.853575	0.91345	3	2	4
O15440-4	Isoform 4 of Multidrug resistance-associated protein 5 OS=Homo sapiens GN=ABCC5 - [MRP5_HUMAN]	ABCC5
O15446	DNA-directed RNA polymerase I subunit RPA34 OS=Homo sapiens GN=CD3EAP PE=1 SV=1 - [RPA34_HUMAN]	CD3EAP	1.17416	1.38154	0.887555	3	4	3
O15460-2	Isoform IIa of Prolyl 4-hydroxylase subunit alpha-2 OS=Homo sapiens GN=P4HA2 - [P4HA2_HUMAN]	P4HA2	1.46844	0.982347	1.01514	1	1	1
O15484	Calpain-5 OS=Homo sapiens GN=CAPN5 PE=1 SV=2 - [CAN5_HUMAN]	CAPN5	1.56794	1.3288	1.1347	3	5	4
O15498	Synaptobrevin homolog YKT6 OS=Homo sapiens GN=YKT6 PE=1 SV=1 - [YKT6_HUMAN]	YKT6	0.941676	1.39242	1.16712	1	2	2
O15504-3	Isoform 3 of Nucleoporin-like protein 2 OS=Homo sapiens GN=NUPL2 - [NUPL2_HUMAN]	NUPL2			0.809087			1
O15511	Actin-related protein 2/3 complex subunit 5 OS=Homo sapiens GN=ARPC5 PE=1 SV=3 - [ARPC5_HUMAN]	ARPC5	0.983828	1.00653	0.97184	5	6	9
O15514	DNA-directed RNA polymerase II subunit RPB4 OS=Homo sapiens GN=POLR2D PE=1 SV=1 - [RPB4_HUMAN]	POLR2D	1.13662	1.36754	1.26127	2	2	1
O15523	ATP-dependent RNA helicase DDX3Y OS=Homo sapiens GN=DDX3Y PE=1 SV=2 - [DDX3Y_HUMAN]	DDX3Y	1.21985	1.01424	1.5174	1	1	3
O15533-2	Isoform 2 of Tapasin OS=Homo sapiens GN=TAPBP - [TPSN_HUMAN]	TAPBP	1.50184	1.38326	1.41733	1	1	1
O15541	RING finger protein 113A OS=Homo sapiens GN=RNF113A PE=1 SV=1 - [R113A_HUMAN]	RNF113A	1.05734	0.684991	0.888437	1	2	2
O15554	Intermediate conductance calcium-activated potassium channel protein 4 OS=Homo sapiens GN=KCNN4 PE=1 SV=1 - [KCNN4_HUMAN]	KCNN4	1.57833	1.64068	1.87071	2	2	2
O43143	Pre-mRNA-splicing factor ATP-dependent RNA helicase DHX15 OS=Homo sapiens GN=DHX15 PE=1 SV=2 - [DHX15_HUMAN]	DHX15	1.05766	1.11247	1.19099	24	23	23
O43148	mRNA cap guanine-N7 methyltransferase OS=Homo sapiens GN=RNMT PE=1 SV=1 - [MCES_HUMAN]	RNMT	1.31558	1.42861	1.36479	3	4	4
O43149	Zinc finger ZZ-type and EF-hand domain-containing protein 1 OS=Homo sapiens GN=ZZEF1 PE=1 SV=6 - [ZZEF1_HUMAN]	ZZEF1	0.988903	1.21489	1.42238	2	1	1
O43156	TELO2-interacting protein 1 homolog OS=Homo sapiens GN=TTI1 PE=1 SV=3 - [TTI1_HUMAN]	TTI1	0.963506	0.762267	0.833527	5	5	4
O43159	Ribosomal RNA-processing protein 8 OS=Homo sapiens GN=RRP8 PE=1 SV=2 - [RRP8_HUMAN]	RRP8	0.904983	0.97381	1.2072	5	3	4
O43169	Cytochrome b5 type B OS=Homo sapiens GN=CYB5B PE=1 SV=2 - [CYB5B_HUMAN]	CYB5B	1.05745	1.05424	1.03843	8	9	9
O43172-2	Isoform 2 of U4/U6 small nuclear ribonucleoprotein Prp4 OS=Homo sapiens GN=PRPF4 - [PRP4_HUMAN]	PRPF4	0.875181	0.902437	0.776938	10	12	13
O43175	D-3-phosphoglycerate dehydrogenase OS=Homo sapiens GN=PHGDH PE=1 SV=4 - [SERA_HUMAN]	PHGDH	0.894652	0.918397	0.924366	29	32	28
O43181	NADH dehydrogenase [ubiquinone] iron-sulfur protein 4, mitochondrial OS=Homo sapiens GN=NDUFS4 PE=1 SV=1 - [NDUS4_HUMAN]	NDUFS4	1.16494	1.26653	1.20715	2	2	2
O43237	Cytoplasmic dynein 1 light intermediate chain 2 OS=Homo sapiens GN=DYNC1LI2 PE=1 SV=1 - [DC1L2_HUMAN]	DYNC1LI2	0.966138	1.01145	0.933062	9	7	9
O43242	26S proteasome non-ATPase regulatory subunit 3 OS=Homo sapiens GN=PSMD3 PE=1 SV=2 - [PSMD3_HUMAN]	PSMD3	0.986931	0.990696	1.03585	20	22	24
O43252	Bifunctional 3'-phosphoadenosine 5'-phosphosulfate synthase 1 OS=Homo sapiens GN=PAPSS1 PE=1 SV=2 - [PAPS1_HUMAN]	PAPSS1	0.919662	0.900264	0.894293	6	6	9
O43264	Centromere/kinetochore protein zw10 homolog OS=Homo sapiens GN=ZW10 PE=1 SV=3 - [ZW10_HUMAN]	ZW10	0.760707		0.850052	6		7
O43290	U4/U6.U5 tri-snRNP-associated protein 1 OS=Homo sapiens GN=SART1 PE=1 SV=1 - [SNUT1_HUMAN]	SART1	0.910124	0.944259	0.97737	14	16	14
O43324	Eukaryotic translation elongation factor 1 epsilon-1 OS=Homo sapiens GN=EEF1E1 PE=1 SV=1 - [MCA3_HUMAN]	EEF1E1	1.03227	0.48468	0.865796	5	3	4
O43353-2	Isoform 2 of Receptor-interacting serine/threonine-protein kinase 2 OS=Homo sapiens GN=RIPK2 - [RIPK2_HUMAN]	RIPK2	0.70759	0.781234	0.711161	1	1	2
O43390	Heterogeneous nuclear ribonucleoprotein R OS=Homo sapiens GN=HNRNPR PE=1 SV=1 - [HNRPR_HUMAN]	HNRNPR	1.02179	1.26911	1.04738	29	4	30
O43395	U4/U6 small nuclear ribonucleoprotein Prp3 OS=Homo sapiens GN=PRPF3 PE=1 SV=2 - [PRPF3_HUMAN]	PRPF3	0.807912	1.04229	0.948947	17	14	15
O43396	Thioredoxin-like protein 1 OS=Homo sapiens GN=TXNL1 PE=1 SV=3 - [TXNL1_HUMAN]	TXNL1	1.04439	0.952105	1.04731	7	12	11
O43399	Tumor protein D54 OS=Homo sapiens GN=TPD52L2 PE=1 SV=2 - [TPD54_HUMAN]	TPD52L2	0.857955	0.918934	0.895728	2	2	2
O43399-2	Isoform 2 of Tumor protein D54 OS=Homo sapiens GN=TPD52L2 - [TPD54_HUMAN]	TPD52L2	1.14029	1.11162	0.916011	1	2	3
O43402	ER membrane protein complex subunit 8 OS=Homo sapiens GN=EMC8 PE=1 SV=1 - [EMC8_HUMAN]	EMC8	1.12411	0.949987	1.15374	4	3	3
O43414-3	Isoform 3 of ERI1 exoribonuclease 3 OS=Homo sapiens GN=ERI3 - [ERI3_HUMAN]	ERI3	0.930189	0.992518	0.551949	1	1	1
O43422	52 kDa repressor of the inhibitor of the protein kinase OS=Homo sapiens GN=PRKRIR PE=1 SV=2 - [P52K_HUMAN]	PRKRIR	1.12679	1.13542	0.985239	1	1	1
O43432-4	Isoform 4 of Eukaryotic translation initiation factor 4 gamma 3 OS=Homo sapiens GN=EIF4G3 - [IF4G3_HUMAN]	EIF4G3	0.985345	0.863841	0.806657	2	3	2
O43447	Peptidyl-prolyl cis-trans isomerase H OS=Homo sapiens GN=PPIH PE=1 SV=1 - [PPIH_HUMAN]	PPIH	0.941161	0.698889	0.679804	4	3	3
O43464-3	Isoform 3 of Serine protease HTRA2, mitochondrial OS=Homo sapiens GN=HTRA2 - [HTRA2_HUMAN]	HTRA2		1.09144	1.0625		1	2
O43488	Aflatoxin B1 aldehyde reductase member 2 OS=Homo sapiens GN=AKR7A2 PE=1 SV=3 - [ARK72_HUMAN]	AKR7A2	0.959914	1.00526	0.805725	4	2	1
O43491-3	Isoform 3 of Band 4.1-like protein 2 OS=Homo sapiens GN=EPB41L2 - [E41L2_HUMAN]	EPB41L2	1.00338	0.968165	0.900275	9	8	12
O43504	Ragulator complex protein LAMTOR5 OS=Homo sapiens GN=LAMTOR5 PE=1 SV=1 - [LTOR5_HUMAN]	LAMTOR5	0.986256	1.12204	0.971616	1	1	2
O43570-2	Isoform 2 of Carbonic anhydrase 12 OS=Homo sapiens GN=CA12 - [CAH12_HUMAN]	CA12	1.21778	1.19423	1.10155	11	8	10
O43572	A-kinase anchor protein 10, mitochondrial OS=Homo sapiens GN=AKAP10 PE=1 SV=2 - [AKA10_HUMAN]	AKAP10	1.01723		0.935422	1		1
O43583	Density-regulated protein OS=Homo sapiens GN=DENR PE=1 SV=2 - [DENR_HUMAN]	DENR	0.797315	1.00667	0.951512	7	6	5
O43592	Exportin-T OS=Homo sapiens GN=XPOT PE=1 SV=2 - [XPOT_HUMAN]	XPOT	0.795776	0.862268	0.875562	16	15	14
O43598	2'-deoxynucleoside 5'-phosphate N-hydrolase 1 OS=Homo sapiens GN=DNPH1 PE=1 SV=1 - [DNPH1_HUMAN]	DNPH1		0.744461	0.943268		4	2
O43615	Mitochondrial import inner membrane translocase subunit TIM44 OS=Homo sapiens GN=TIMM44 PE=1 SV=2 - [TIM44_HUMAN]	TIMM44	1.06562	1.00549	1.15327	11	17	13
O43633	Charged multivesicular body protein 2a OS=Homo sapiens GN=CHMP2A PE=1 SV=1 - [CHM2A_HUMAN]	CHMP2A		1.25772	1.71057		3	3
O43657	Tetraspanin-6 OS=Homo sapiens GN=TSPAN6 PE=1 SV=1 - [TSN6_HUMAN]	TSPAN6	1.64285	1.35064	1.52449	3	3	3
O43660-2	Isoform 2 of Pleiotropic regulator 1 OS=Homo sapiens GN=PLRG1 - [PLRG1_HUMAN]	PLRG1	0.951849	1.0783	1.01344	8	7	8
O43670-2	Isoform 2 of BUB3-interacting and GLEBS motif-containing protein ZNF207 OS=Homo sapiens GN=ZNF207 - [ZN207_HUMAN]	ZNF207	1.02701	1.06905	1.03233	5	5	7
O43678	NADH dehydrogenase [ubiquinone] 1 alpha subcomplex subunit 2 OS=Homo sapiens GN=NDUFA2 PE=1 SV=3 - [NDUA2_HUMAN]	NDUFA2	1.03732	0.999209	1.02912	4	2	2
O43681	ATPase ASNA1 OS=Homo sapiens GN=ASNA1 PE=1 SV=2 - [ASNA_HUMAN]	ASNA1	0.900666	0.799088	0.954441	9	11	12
O43683-3	Isoform 3 of Mitotic checkpoint serine/threonine-protein kinase BUB1 OS=Homo sapiens GN=BUB1 - [BUB1_HUMAN]	BUB1		0.856125	0.962213		1	1
O43684-2	Isoform 2 of Mitotic checkpoint protein BUB3 OS=Homo sapiens GN=BUB3 - [BUB3_HUMAN]	BUB3	1.06714	1.03496	1.06873	14	13	12
O43707	Alpha-actinin-4 OS=Homo sapiens GN=ACTN4 PE=1 SV=2 - [ACTN4_HUMAN]	ACTN4	1.48224	1.49124	1.4758	89	82	82
O43708-2	Isoform 2 of Maleylacetoacetate isomerase OS=Homo sapiens GN=GSTZ1 - [MAAI_HUMAN]	GSTZ1	0.955936	1.38458	0.57232	3	2	2
O43709	Probable 18S rRNA (guanine-N(7))-methyltransferase OS=Homo sapiens GN=WBSCR22 PE=1 SV=2 - [WBS22_HUMAN]	WBSCR22	1.24722			1
O43716	Glutamyl-tRNA(Gln) amidotransferase subunit C, mitochondrial OS=Homo sapiens GN=GATC PE=1 SV=1 - [GATC_HUMAN]	GATC	0.843229	0.789837	0.485274	1	1	1
O43719	HIV Tat-specific factor 1 OS=Homo sapiens GN=HTATSF1 PE=1 SV=1 - [HTSF1_HUMAN]	HTATSF1	0.970456	1.2516	1.1715	6	3	5
O43747	AP-1 complex subunit gamma-1 OS=Homo sapiens GN=AP1G1 PE=1 SV=5 - [AP1G1_HUMAN]	AP1G1	0.942528	0.838262	0.878153	10	9	11
O43752-2	Isoform 2 of Syntaxin-6 OS=Homo sapiens GN=STX6 - [STX6_HUMAN]	STX6
O43760	Synaptogyrin-2 OS=Homo sapiens GN=SYNGR2 PE=1 SV=1 - [SNG2_HUMAN]	SYNGR2		1.38993	0.578421		1	2
O43765	Small glutamine-rich tetratricopeptide repeat-containing protein alpha OS=Homo sapiens GN=SGTA PE=1 SV=1 - [SGTA_HUMAN]	SGTA	0.678329		0.725423	3		2
O43768-6	Isoform 6 of Alpha-endosulfine OS=Homo sapiens GN=ENSA - [ENSA_HUMAN]	ENSA	1.17015		1.27386	2		2
O43772	Mitochondrial carnitine/acylcarnitine carrier protein OS=Homo sapiens GN=SLC25A20 PE=1 SV=1 - [MCAT_HUMAN]	SLC25A20	1.3864		1.78152	1		1
O43776	Asparagine--tRNA ligase, cytoplasmic OS=Homo sapiens GN=NARS PE=1 SV=1 - [SYNC_HUMAN]	NARS	1.08134	1.10926	1.1058	33	33	35
O43795-2	Isoform 2 of Unconventional myosin-Ib OS=Homo sapiens GN=MYO1B - [MYO1B_HUMAN]	MYO1B	1.1995	1.21728	1.25952	26	25	24
O43809	Cleavage and polyadenylation specificity factor subunit 5 OS=Homo sapiens GN=NUDT21 PE=1 SV=1 - [CPSF5_HUMAN]	NUDT21	1.02204	1.06746	0.96795	9	10	9
O43813	LanC-like protein 1 OS=Homo sapiens GN=LANCL1 PE=1 SV=1 - [LANC1_HUMAN]	LANCL1	2.16386	1.00668	0.473118	2	2	1
O43815	Striatin OS=Homo sapiens GN=STRN PE=1 SV=4 - [STRN_HUMAN]	STRN		1.56602	1.5058		3	3
O43818	U3 small nucleolar RNA-interacting protein 2 OS=Homo sapiens GN=RRP9 PE=1 SV=1 - [U3IP2_HUMAN]	RRP9	1.04336	0.94566	1.11877	4	7	7
O43819	Protein SCO2 homolog, mitochondrial OS=Homo sapiens GN=SCO2 PE=1 SV=3 - [SCO2_HUMAN]	SCO2	1.1593	1.3328	1.27683	2	1	1
O43823	A-kinase anchor protein 8 OS=Homo sapiens GN=AKAP8 PE=1 SV=1 - [AKAP8_HUMAN]	AKAP8	1.09731	0.991259	1.02197	6	6	4
O43837	Isocitrate dehydrogenase [NAD] subunit beta, mitochondrial OS=Homo sapiens GN=IDH3B PE=1 SV=2 - [IDH3B_HUMAN]	IDH3B	1.06716	1.12408	1.07504	7	9	10
O43847	Nardilysin OS=Homo sapiens GN=NRD1 PE=1 SV=2 - [NRDC_HUMAN]	NRD1		0.518855	0.703172		1	1
O43852	Calumenin OS=Homo sapiens GN=CALU PE=1 SV=2 - [CALU_HUMAN]	CALU	1.30515	1.27183	1.20321	6	6	5
O43852-2	Isoform 2 of Calumenin OS=Homo sapiens GN=CALU - [CALU_HUMAN]	CALU	1.24936	1.12452	1.25129	1	1	1
O43865	Putative adenosylhomocysteinase 2 OS=Homo sapiens GN=AHCYL1 PE=1 SV=2 - [SAHH2_HUMAN]	AHCYL1	1.15026	1.17336	1.16734	4	5	6
O43903	Growth arrest-specific protein 2 OS=Homo sapiens GN=GAS2 PE=1 SV=1 - [GAS2_HUMAN]	GAS2		0.554011	0.620469		1	1
O43913-2	Isoform 2 of Origin recognition complex subunit 5 OS=Homo sapiens GN=ORC5 - [ORC5_HUMAN]	ORC5	0.388907		0.668628	1		1
O43920	NADH dehydrogenase [ubiquinone] iron-sulfur protein 5 OS=Homo sapiens GN=NDUFS5 PE=1 SV=3 - [NDUS5_HUMAN]	NDUFS5	1.05336	0.999131	0.910821	3	3	2
O43924	Retinal rod rhodopsin-sensitive cGMP 3',5'-cyclic phosphodiesterase subunit delta OS=Homo sapiens GN=PDE6D PE=1 SV=1 - [PDE6D_HUMAN]	PDE6D			1.41233			1
O43929-2	Isoform 2 of Origin recognition complex subunit 4 OS=Homo sapiens GN=ORC4 - [ORC4_HUMAN]	ORC4	0.737203	0.765271	0.748289	2	2	2
O60216	Double-strand-break repair protein rad21 homolog OS=Homo sapiens GN=RAD21 PE=1 SV=2 - [RAD21_HUMAN]	RAD21	1.08583	1.06145	1.01317	2	5	4
O60218	Aldo-keto reductase family 1 member B10 OS=Homo sapiens GN=AKR1B10 PE=1 SV=2 - [AK1BA_HUMAN]	AKR1B10	0.892147	0.915897	0.885261	137	136	145
O60220	Mitochondrial import inner membrane translocase subunit Tim8 A OS=Homo sapiens GN=TIMM8A PE=1 SV=1 - [TIM8A_HUMAN]	TIMM8A	1.14705	1.1416	1.0968	3	4	3
O60231	Putative pre-mRNA-splicing factor ATP-dependent RNA helicase DHX16 OS=Homo sapiens GN=DHX16 PE=1 SV=2 - [DHX16_HUMAN]	DHX16	1.15291	0.95552	1.08894	4	2	3
O60232	Sjoegren syndrome/scleroderma autoantigen 1 OS=Homo sapiens GN=SSSCA1 PE=1 SV=1 - [SSA27_HUMAN]	SSSCA1	1.06273	1.44869	1.4565	1	2	1
O60256-4	Isoform 4 of Phosphoribosyl pyrophosphate synthase-associated protein 2 OS=Homo sapiens GN=PRPSAP2 - [KPRB_HUMAN]	PRPSAP2	0.810595	0.693292	0.690322	3	3	3
O60264	SWI/SNF-related matrix-associated actin-dependent regulator of chromatin subfamily A member 5 OS=Homo sapiens GN=SMARCA5 PE=1 SV=1 - [SMCA5_HUMAN]	SMARCA5	0.826986	0.84356	0.860078	14	12	15
O60271-4	Isoform 4 of C-Jun-amino-terminal kinase-interacting protein 4 OS=Homo sapiens GN=SPAG9 - [JIP4_HUMAN]	SPAG9	1.38098	1.34741	1.40976	25	31	23
O60287	Nucleolar pre-ribosomal-associated protein 1 OS=Homo sapiens GN=URB1 PE=1 SV=4 - [NPA1P_HUMAN]	URB1	1.02468	1.09821	1.04908	3	2	1
O60292	Signal-induced proliferation-associated 1-like protein 3 OS=Homo sapiens GN=SIPA1L3 PE=1 SV=3 - [SI1L3_HUMAN]	SIPA1L3	2.85892	2.76634	2.14237	2	3	2
O60306	Intron-binding protein aquarius OS=Homo sapiens GN=AQR PE=1 SV=4 - [AQR_HUMAN]	AQR	0.810288	0.761184	0.676226	4	5	3
O60313	Dynamin-like 120 kDa protein, mitochondrial OS=Homo sapiens GN=OPA1 PE=1 SV=3 - [OPA1_HUMAN]	OPA1	0.935593	1.17534	0.93354	16	15	7
O60341	Lysine-specific histone demethylase 1A OS=Homo sapiens GN=KDM1A PE=1 SV=2 - [KDM1A_HUMAN]	KDM1A	1.0632	0.92576	0.668958	3	1	5
O60361	Putative nucleoside diphosphate kinase OS=Homo sapiens GN=NME2P1 PE=5 SV=1 - [NDK8_HUMAN]	NME2P1	0.911101	0.909073	0.976748	3	4	2
O60437	Periplakin OS=Homo sapiens GN=PPL PE=1 SV=4 - [PEPL_HUMAN]	PPL
O60443	Non-syndromic hearing impairment protein 5 OS=Homo sapiens GN=DFNA5 PE=1 SV=2 - [DFNA5_HUMAN]	DFNA5	0.681206	0.588723	0.582554	4	4	2
O60488-2	Isoform Short of Long-chain-fatty-acid--CoA ligase 4 OS=Homo sapiens GN=ACSL4 - [ACSL4_HUMAN]	ACSL4	0.982756	1.00301	1.06735	11	12	14
O60493	Sorting nexin-3 OS=Homo sapiens GN=SNX3 PE=1 SV=3 - [SNX3_HUMAN]	SNX3	1.10705	0.92161	1.0029	3	6	7
O60502-2	Isoform 2 of Protein O-GlcNAcase OS=Homo sapiens GN=MGEA5 - [OGA_HUMAN]	MGEA5			0.33156			1
O60504-2	Isoform Beta of Vinexin OS=Homo sapiens GN=SORBS3 - [VINEX_HUMAN]	SORBS3	0.991547		0.930093	1		1
O60506	Heterogeneous nuclear ribonucleoprotein Q OS=Homo sapiens GN=SYNCRIP PE=1 SV=2 - [HNRPQ_HUMAN]	SYNCRIP	1.06947		1.13433	33		28
O60508	Pre-mRNA-processing factor 17 OS=Homo sapiens GN=CDC40 PE=1 SV=1 - [PRP17_HUMAN]	CDC40		1.32474	0.96996		1	2
O60547-2	Isoform 2 of GDP-mannose 4,6 dehydratase OS=Homo sapiens GN=GMDS - [GMDS_HUMAN]	GMDS	0.409001		0.551393	1		1
O60563-2	Isoform 2 of Cyclin-T1 OS=Homo sapiens GN=CCNT1 - [CCNT1_HUMAN]	CCNT1		0.901178			1
O60568	Procollagen-lysine,2-oxoglutarate 5-dioxygenase 3 OS=Homo sapiens GN=PLOD3 PE=1 SV=1 - [PLOD3_HUMAN]	PLOD3	0.990033	0.977249	1.09103	23	13	19
O60573	Eukaryotic translation initiation factor 4E type 2 OS=Homo sapiens GN=EIF4E2 PE=1 SV=1 - [IF4E2_HUMAN]	EIF4E2	0.841876		0.811674	2		3
O60583-2	Isoform 2 of Cyclin-T2 OS=Homo sapiens GN=CCNT2 - [CCNT2_HUMAN]	CCNT2			0.995708			1
O60610-2	Isoform 2 of Protein diaphanous homolog 1 OS=Homo sapiens GN=DIAPH1 - [DIAP1_HUMAN]	DIAPH1	1.02425	0.993307	1.01671	13	14	12
O60645-2	Isoform 2 of Exocyst complex component 3 OS=Homo sapiens GN=EXOC3 - [EXOC3_HUMAN]	EXOC3	0.640672	1.02128	0.877699	3	3	2
O60664-4	Isoform 4 of Perilipin-3 OS=Homo sapiens GN=PLIN3 - [PLIN3_HUMAN]	PLIN3	0.996423	1.02567	1.00547	18	15	18
O60678	Protein arginine N-methyltransferase 3 OS=Homo sapiens GN=PRMT3 PE=1 SV=3 - [ANM3_HUMAN]	PRMT3			0.614			3
O60684	Importin subunit alpha-7 OS=Homo sapiens GN=KPNA6 PE=1 SV=1 - [IMA7_HUMAN]	KPNA6	0.560313	0.932283	0.573277	4	5	2
O60701	UDP-glucose 6-dehydrogenase OS=Homo sapiens GN=UGDH PE=1 SV=1 - [UGDH_HUMAN]	UGDH	1.02278	1.03177	1.00896	116	109	120
O60716-21	Isoform 3A of Catenin delta-1 OS=Homo sapiens GN=CTNND1 - [CTND1_HUMAN]	CTNND1	0.893671	0.857115	0.83527	41	37	38
O60749-2	Isoform 2 of Sorting nexin-2 OS=Homo sapiens GN=SNX2 - [SNX2_HUMAN]	SNX2	1.13806	1.21424	1.0264	6	7	6
O60762	Dolichol-phosphate mannosyltransferase subunit 1 OS=Homo sapiens GN=DPM1 PE=1 SV=1 - [DPM1_HUMAN]	DPM1	0.857109	0.926357	0.874047	6	6	5
O60763	General vesicular transport factor p115 OS=Homo sapiens GN=USO1 PE=1 SV=2 - [USO1_HUMAN]	USO1	0.958925	0.994202	0.99715	25	23	21
O60783	28S ribosomal protein S14, mitochondrial OS=Homo sapiens GN=MRPS14 PE=1 SV=1 - [RT14_HUMAN]	MRPS14	0.713652	0.881777	0.924979	2	2	3
O60784	Target of Myb protein 1 OS=Homo sapiens GN=TOM1 PE=1 SV=2 - [TOM1_HUMAN]	TOM1	1.25077	1.18881	1.39859	3	2	3
O60814	Histone H2B type 1-K OS=Homo sapiens GN=HIST1H2BK PE=1 SV=3 - [H2B1K_HUMAN]	HIST1H2BK	1.20788	1.14062	1.11626	5	6	6
O60825-2	Isoform 2 of 6-phosphofructo-2-kinase/fructose-2,6-bisphosphatase 2 OS=Homo sapiens GN=PFKFB2 - [F262_HUMAN]	PFKFB2	0.600521		0.596795	1		1
O60826	Coiled-coil domain-containing protein 22 OS=Homo sapiens GN=CCDC22 PE=1 SV=1 - [CCD22_HUMAN]	CCDC22	0.529519	0.729346	0.665975	4	4	5
O60828-5	Isoform 5 of Polyglutamine-binding protein 1 OS=Homo sapiens GN=PQBP1 - [PQBP1_HUMAN]	PQBP1		0.8813	0.840996		3	1
O60830	Mitochondrial import inner membrane translocase subunit Tim17-B OS=Homo sapiens GN=TIMM17B PE=1 SV=1 - [TI17B_HUMAN]	TIMM17B			0.929137			1
O60832	H/ACA ribonucleoprotein complex subunit 4 OS=Homo sapiens GN=DKC1 PE=1 SV=3 - [DKC1_HUMAN]	DKC1	0.921405	0.919484	0.877029	18	16	13
O60841	Eukaryotic translation initiation factor 5B OS=Homo sapiens GN=EIF5B PE=1 SV=4 - [IF2P_HUMAN]	EIF5B	1.0354	1.00034	1.01746	36	35	35
O60869-2	Isoform 2 of Endothelial differentiation-related factor 1 OS=Homo sapiens GN=EDF1 - [EDF1_HUMAN]	EDF1	0.881854	0.857737	1.06076	2	4	1
O60879-2	Isoform 2 of Protein diaphanous homolog 2 OS=Homo sapiens GN=DIAPH2 - [DIAP2_HUMAN]	DIAPH2	0.541712	0.504136	0.733984	3	5	3
O60884	DnaJ homolog subfamily A member 2 OS=Homo sapiens GN=DNAJA2 PE=1 SV=1 - [DNJA2_HUMAN]	DNAJA2	1.00524	1.07693	1.00029	11	7	10
O60888-3	Isoform C of Protein CutA OS=Homo sapiens GN=CUTA - [CUTA_HUMAN]	CUTA	1.04421	1.41296	0.987949	4	4	3
O60925	Prefoldin subunit 1 OS=Homo sapiens GN=PFDN1 PE=1 SV=2 - [PFD1_HUMAN]	PFDN1	1.3309	1.13706	1.26652	5	3	2
O60927	Protein phosphatase 1 regulatory subunit 11 OS=Homo sapiens GN=PPP1R11 PE=1 SV=1 - [PP1RB_HUMAN]	PPP1R11	0.829845	1.01034	1.04832	1	1	2
O60934	Nibrin OS=Homo sapiens GN=NBN PE=1 SV=1 - [NBN_HUMAN]	NBN	0.879934	0.93834	0.86047	6	5	5
O60936	Nucleolar protein 3 OS=Homo sapiens GN=NOL3 PE=1 SV=2 - [NOL3_HUMAN]	NOL3	0.955811	1.14535	0.938816	4	3	4
O75027	ATP-binding cassette sub-family B member 7, mitochondrial OS=Homo sapiens GN=ABCB7 PE=1 SV=2 - [ABCB7_HUMAN]	ABCB7	1.16424	1.04856	1.14415	6	5	4
O75051	Plexin-A2 OS=Homo sapiens GN=PLXNA2 PE=1 SV=4 - [PLXA2_HUMAN]	PLXNA2		0.308759	0.427927		1	1
O75063	Glycosaminoglycan xylosylkinase OS=Homo sapiens GN=FAM20B PE=1 SV=1 - [XYLK_HUMAN]	FAM20B		1.03649	1.25014		1	1
O75064	DENN domain-containing protein 4B OS=Homo sapiens GN=DENND4B PE=1 SV=4 - [DEN4B_HUMAN]	DENND4B	0.703204		0.492729	1		1
O75083	WD repeat-containing protein 1 OS=Homo sapiens GN=WDR1 PE=1 SV=4 - [WDR1_HUMAN]	WDR1	1.0439	1.05313	1.0835	34	41	36
O75116	Rho-associated protein kinase 2 OS=Homo sapiens GN=ROCK2 PE=1 SV=4 - [ROCK2_HUMAN]	ROCK2	0.754341	0.718597	0.733548	6	8	7
O75127	Pentatricopeptide repeat-containing protein 1, mitochondrial OS=Homo sapiens GN=PTCD1 PE=1 SV=2 - [PTCD1_HUMAN]	PTCD1	0.955649	1.07429	0.999211	2	3	3
O75131	Copine-3 OS=Homo sapiens GN=CPNE3 PE=1 SV=1 - [CPNE3_HUMAN]	CPNE3	1.08509	1.04698	1.08753	17	23	20
O75146	Huntingtin-interacting protein 1-related protein OS=Homo sapiens GN=HIP1R PE=1 SV=2 - [HIP1R_HUMAN]	HIP1R	1.42103	1.13178	1.15197	4	6	6
O75150-3	Isoform 3 of E3 ubiquitin-protein ligase BRE1B OS=Homo sapiens GN=RNF40 - [BRE1B_HUMAN]	RNF40	0.508605	1.08494	0.705409	1	2	1
O75152	Zinc finger CCCH domain-containing protein 11A OS=Homo sapiens GN=ZC3H11A PE=1 SV=3 - [ZC11A_HUMAN]	ZC3H11A	0.838747		0.675617	2		2
O75153	Clustered mitochondria protein homolog OS=Homo sapiens GN=CLUH PE=1 SV=2 - [CLU_HUMAN]	CLUH	0.91575	0.850026	0.948092	19	18	19
O75165	DnaJ homolog subfamily C member 13 OS=Homo sapiens GN=DNAJC13 PE=1 SV=5 - [DJC13_HUMAN]	DNAJC13	0.697474	0.768351	0.806718	6	9	7
O75170-6	Isoform 6 of Serine/threonine-protein phosphatase 6 regulatory subunit 2 OS=Homo sapiens GN=PPP6R2 - [PP6R2_HUMAN]	PPP6R2			0.591427			1
O75175-3	Isoform 3 of CCR4-NOT transcription complex subunit 3 OS=Homo sapiens GN=CNOT3 - [CNOT3_HUMAN]	CNOT3			1.14921			1
O75179-6	Isoform 6 of Ankyrin repeat domain-containing protein 17 OS=Homo sapiens GN=ANKRD17 - [ANR17_HUMAN]	ANKRD17	0.703087	0.886094	1.13647	2	2	1
O75190	DnaJ homolog subfamily B member 6 OS=Homo sapiens GN=DNAJB6 PE=1 SV=2 - [DNJB6_HUMAN]	DNAJB6	1.01974		1.88013	2		2
O75208	Ubiquinone biosynthesis protein COQ9, mitochondrial OS=Homo sapiens GN=COQ9 PE=1 SV=1 - [COQ9_HUMAN]	COQ9		2.45647	2.28746		3	2
O75223-3	Isoform 3 of Gamma-glutamylcyclotransferase OS=Homo sapiens GN=GGCT - [GGCT_HUMAN]	GGCT	1.04881		1.02875	3		2
O75251	NADH dehydrogenase [ubiquinone] iron-sulfur protein 7, mitochondrial OS=Homo sapiens GN=NDUFS7 PE=1 SV=3 - [NDUS7_HUMAN]	NDUFS7	0.959429		0.823927	2		1
O75306-2	Isoform 2 of NADH dehydrogenase [ubiquinone] iron-sulfur protein 2, mitochondrial OS=Homo sapiens GN=NDUFS2 - [NDUS2_HUMAN]	NDUFS2	0.998707	0.872301	0.64062	5	5	5
O75312	Zinc finger protein ZPR1 OS=Homo sapiens GN=ZPR1 PE=1 SV=1 - [ZPR1_HUMAN]	ZPR1	0.679797	0.794085	0.688936	4	5	2
O75319	RNA/RNP complex-1-interacting phosphatase OS=Homo sapiens GN=DUSP11 PE=1 SV=1 - [DUS11_HUMAN]	DUSP11	0.973685	0.854672	0.951915	2	2	2
O75323	Protein NipSnap homolog 2 OS=Homo sapiens GN=GBAS PE=1 SV=1 - [NIPS2_HUMAN]	GBAS	0.889676	0.817873	0.946747	2	3	3
O75340	Programmed cell death protein 6 OS=Homo sapiens GN=PDCD6 PE=1 SV=1 - [PDCD6_HUMAN]	PDCD6	1.04874	0.984342	1.07784	15	15	11
O75347	Tubulin-specific chaperone A OS=Homo sapiens GN=TBCA PE=1 SV=3 - [TBCA_HUMAN]	TBCA	1.15634	1.17089	1.18339	7	6	5
O75348	V-type proton ATPase subunit G 1 OS=Homo sapiens GN=ATP6V1G1 PE=1 SV=3 - [VATG1_HUMAN]	ATP6V1G1	1.10136	0.903714	0.943262	3	2	2
O75351	Vacuolar protein sorting-associated protein 4B OS=Homo sapiens GN=VPS4B PE=1 SV=2 - [VPS4B_HUMAN]	VPS4B	0.962093	0.915808	0.991359	5	5	5
O75352-2	Isoform 2 of Mannose-P-dolichol utilization defect 1 protein OS=Homo sapiens GN=MPDU1 - [MPU1_HUMAN]	MPDU1	0.864601	1.06578	1.543	1	2	3
O75356	Ectonucleoside triphosphate diphosphohydrolase 5 OS=Homo sapiens GN=ENTPD5 PE=1 SV=1 - [ENTP5_HUMAN]	ENTPD5	1.39718	1.40624	1.42366	9	7	8
O75363	Breast carcinoma-amplified sequence 1 OS=Homo sapiens GN=BCAS1 PE=1 SV=2 - [BCAS1_HUMAN]	BCAS1	0.966628	3.54196	1.14051	7	2	4
O75367-2	Isoform 1 of Core histone macro-H2A.1 OS=Homo sapiens GN=H2AFY - [H2AY_HUMAN]	H2AFY	1.16413	1.03689	1.12512	17	14	15
O75368	SH3 domain-binding glutamic acid-rich-like protein OS=Homo sapiens GN=SH3BGRL PE=1 SV=1 - [SH3L1_HUMAN]	SH3BGRL	1.01419	0.945811	1.12707	3	4	8
O75369-8	Isoform 8 of Filamin-B OS=Homo sapiens GN=FLNB - [FLNB_HUMAN]	FLNB		0.945955	0.948676		203	209
O75380	NADH dehydrogenase [ubiquinone] iron-sulfur protein 6, mitochondrial OS=Homo sapiens GN=NDUFS6 PE=1 SV=1 - [NDUS6_HUMAN]	NDUFS6	0.803887	0.9305	0.865376	1	1	2
O75390	Citrate synthase, mitochondrial OS=Homo sapiens GN=CS PE=1 SV=2 - [CISY_HUMAN]	CS	1.05443	1.12621	1.09719	25	32	28
O75396	Vesicle-trafficking protein SEC22b OS=Homo sapiens GN=SEC22B PE=1 SV=4 - [SC22B_HUMAN]	SEC22B	1.0654	1.10595	1.14588	10	9	9
O75400-3	Isoform 3 of Pre-mRNA-processing factor 40 homolog A OS=Homo sapiens GN=PRPF40A - [PR40A_HUMAN]	PRPF40A	1.4815	1.26885	1.1769	6	9	9
O75410-7	Isoform 7 of Transforming acidic coiled-coil-containing protein 1 OS=Homo sapiens GN=TACC1 - [TACC1_HUMAN]	TACC1	0.586799	0.423196	0.607779	3	1	1
O75431-2	Isoform 2 of Metaxin-2 OS=Homo sapiens GN=MTX2 - [MTX2_HUMAN]	MTX2		1.28891	1.35459		5	5
O75436	Vacuolar protein sorting-associated protein 26A OS=Homo sapiens GN=VPS26A PE=1 SV=2 - [VP26A_HUMAN]	VPS26A	1.09405	1.17183	1.15851	12	14	12
O75438	NADH dehydrogenase [ubiquinone] 1 beta subcomplex subunit 1 OS=Homo sapiens GN=NDUFB1 PE=1 SV=1 - [NDUB1_HUMAN]	NDUFB1	1.25782	2.14626	0.344007	2	1	1
O75439	Mitochondrial-processing peptidase subunit beta OS=Homo sapiens GN=PMPCB PE=1 SV=2 - [MPPB_HUMAN]	PMPCB	0.968053	1.08607	0.911633	8	8	7
O75448-2	Isoform 2 of Mediator of RNA polymerase II transcription subunit 24 OS=Homo sapiens GN=MED24 - [MED24_HUMAN]	MED24	0.642174	0.833349	0.778882	2	2	3
O75449-2	Isoform 2 of Katanin p60 ATPase-containing subunit A1 OS=Homo sapiens GN=KATNA1 - [KTNA1_HUMAN]	KATNA1	1.19398	0.631929	0.874113	1	1	1
O75475	PC4 and SFRS1-interacting protein OS=Homo sapiens GN=PSIP1 PE=1 SV=1 - [PSIP1_HUMAN]	PSIP1			1.34542			1
O75477	Erlin-1 OS=Homo sapiens GN=ERLIN1 PE=1 SV=1 - [ERLN1_HUMAN]	ERLIN1	1.39057	1.39216	1.40423	2	2	2
O75489	NADH dehydrogenase [ubiquinone] iron-sulfur protein 3, mitochondrial OS=Homo sapiens GN=NDUFS3 PE=1 SV=1 - [NDUS3_HUMAN]	NDUFS3	0.837894	0.882974	0.779242	7	10	4
O75494-5	Isoform 5 of Serine/arginine-rich splicing factor 10 OS=Homo sapiens GN=SRSF10 - [SRS10_HUMAN]	SRSF10	1.11104	0.759506	0.99632	5	4	4
O75506	Heat shock factor-binding protein 1 OS=Homo sapiens GN=HSBP1 PE=1 SV=1 - [HSBP1_HUMAN]	HSBP1	0.884781	0.81754	1.02511	4	1	2
O75521-2	Isoform 2 of Enoyl-CoA delta isomerase 2, mitochondrial OS=Homo sapiens GN=ECI2 - [ECI2_HUMAN]	ECI2	0.829693	0.940314	2.87806	3	2	3
O75528-2	Isoform 2 of Transcriptional adapter 3 OS=Homo sapiens GN=TADA3 - [TADA3_HUMAN]	TADA3	1.9386	1.69305	0.935331	1	1	1
O75530-3	Isoform 3 of Polycomb protein EED OS=Homo sapiens GN=EED - [EED_HUMAN]	EED	1.10489		1.51082	2		1
O75531	Barrier-to-autointegration factor OS=Homo sapiens GN=BANF1 PE=1 SV=1 - [BAF_HUMAN]	BANF1	1.02163	1.03092	1.04338	10	10	11
O75533	Splicing factor 3B subunit 1 OS=Homo sapiens GN=SF3B1 PE=1 SV=3 - [SF3B1_HUMAN]	SF3B1	1.12117	1.10696	1.11901	36	36	34
O75534-2	Isoform 2 of Cold shock domain-containing protein E1 OS=Homo sapiens GN=CSDE1 - [CSDE1_HUMAN]	CSDE1	0.852592	0.839685	0.85706	11	14	14
O75569-3	Isoform 3 of Interferon-inducible double-stranded RNA-dependent protein kinase activator A OS=Homo sapiens GN=PRKRA - [PRKRA_HUMAN]	PRKRA	0.57206	0.695199	0.690181	5	4	4
O75607	Nucleoplasmin-3 OS=Homo sapiens GN=NPM3 PE=1 SV=3 - [NPM3_HUMAN]	NPM3	0.80585	1.08525	0.854144	4	5	4
O75608-2	Isoform 2 of Acyl-protein thioesterase 1 OS=Homo sapiens GN=LYPLA1 - [LYPA1_HUMAN]	LYPLA1	0.954186	0.901313	1.09754	5	5	4
O75616	GTPase Era, mitochondrial OS=Homo sapiens GN=ERAL1 PE=1 SV=2 - [ERAL1_HUMAN]	ERAL1	1.12523	1.04898	1.02293	2	3	5
O75629	Protein CREG1 OS=Homo sapiens GN=CREG1 PE=1 SV=1 - [CREG1_HUMAN]	CREG1	1.21567	1.04987	1.03508	1	2	2
O75643	U5 small nuclear ribonucleoprotein 200 kDa helicase OS=Homo sapiens GN=SNRNP200 PE=1 SV=2 - [U520_HUMAN]	SNRNP200	0.919936	0.973672	0.923586	51	55	55
O75663	TIP41-like protein OS=Homo sapiens GN=TIPRL PE=1 SV=2 - [TIPRL_HUMAN]	TIPRL	0.956328	1.00466	0.920784	5	2	2
O75674-2	Isoform 2 of TOM1-like protein 1 OS=Homo sapiens GN=TOM1L1 - [TM1L1_HUMAN]	TOM1L1
O75683	Surfeit locus protein 6 OS=Homo sapiens GN=SURF6 PE=1 SV=3 - [SURF6_HUMAN]	SURF6
O75688	Protein phosphatase 1B OS=Homo sapiens GN=PPM1B PE=1 SV=1 - [PPM1B_HUMAN]	PPM1B	0.837057		0.579826	4		5
O75691	Small subunit processome component 20 homolog OS=Homo sapiens GN=UTP20 PE=1 SV=3 - [UTP20_HUMAN]	UTP20	0.94396	0.862622	0.876839	5	4	3
O75694-2	Isoform 2 of Nuclear pore complex protein Nup155 OS=Homo sapiens GN=NUP155 - [NU155_HUMAN]	NUP155			1.07393			14
O75718	Cartilage-associated protein OS=Homo sapiens GN=CRTAP PE=1 SV=1 - [CRTAP_HUMAN]	CRTAP		3.26786	3.38846		1	1
O75746	Calcium-binding mitochondrial carrier protein Aralar1 OS=Homo sapiens GN=SLC25A12 PE=1 SV=2 - [CMC1_HUMAN]	SLC25A12		1.59572	0.993829		3	5
O75787-2	Isoform 2 of Renin receptor OS=Homo sapiens GN=ATP6AP2 - [RENR_HUMAN]	ATP6AP2	0.961301	0.92842	0.843447	3	3	2
O75817	Ribonuclease P protein subunit p20 OS=Homo sapiens GN=POP7 PE=1 SV=2 - [POP7_HUMAN]	POP7			4.51411			1
O75818-2	Isoform 2 of Ribonuclease P protein subunit p40 OS=Homo sapiens GN=RPP40 - [RPP40_HUMAN]	RPP40		4.36257			1
O75821	Eukaryotic translation initiation factor 3 subunit G OS=Homo sapiens GN=EIF3G PE=1 SV=2 - [EIF3G_HUMAN]	EIF3G	0.929034	0.884367	0.786054	4	5	5
O75822-3	Isoform 3 of Eukaryotic translation initiation factor 3 subunit J OS=Homo sapiens GN=EIF3J - [EIF3J_HUMAN]	EIF3J	1.12842	1.07508	1.09718	12	9	9
O75828	Carbonyl reductase [NADPH] 3 OS=Homo sapiens GN=CBR3 PE=1 SV=3 - [CBR3_HUMAN]	CBR3	0.892162	0.980414	0.867183	3	2	2
O75832	26S proteasome non-ATPase regulatory subunit 10 OS=Homo sapiens GN=PSMD10 PE=1 SV=1 - [PSD10_HUMAN]	PSMD10	0.777324	0.815645	0.785348	5	5	6
O75844	CAAX prenyl protease 1 homolog OS=Homo sapiens GN=ZMPSTE24 PE=1 SV=2 - [FACE1_HUMAN]	ZMPSTE24	1.23175	1.29063	1.29641	7	7	7
O75874	Isocitrate dehydrogenase [NADP] cytoplasmic OS=Homo sapiens GN=IDH1 PE=1 SV=2 - [IDHC_HUMAN]	IDH1	0.943076	0.925145	0.940222	36	33	37
O75879	Glutamyl-tRNA(Gln) amidotransferase subunit B, mitochondrial OS=Homo sapiens GN=GATB PE=1 SV=1 - [GATB_HUMAN]	GATB
O75880	Protein SCO1 homolog, mitochondrial OS=Homo sapiens GN=SCO1 PE=1 SV=1 - [SCO1_HUMAN]	SCO1	1.28178	1.58413	1.61821	2	4	3
O75884-2	Isoform 2 of Putative hydrolase RBBP9 OS=Homo sapiens GN=RBBP9 - [RBBP9_HUMAN]	RBBP9	1.10569	1.14445	1.41658	1	1	1
O75907	Diacylglycerol O-acyltransferase 1 OS=Homo sapiens GN=DGAT1 PE=1 SV=2 - [DGAT1_HUMAN]	DGAT1		0.539108			1
O75911	Short-chain dehydrogenase/reductase 3 OS=Homo sapiens GN=DHRS3 PE=1 SV=2 - [DHRS3_HUMAN]	DHRS3	1.31702	1.24838	1.44855	1	1	3
O75915	PRA1 family protein 3 OS=Homo sapiens GN=ARL6IP5 PE=1 SV=1 - [PRAF3_HUMAN]	ARL6IP5	0.960953	0.949831	1.01541	8	10	9
O75928-3	Isoform 3 of E3 SUMO-protein ligase PIAS2 OS=Homo sapiens GN=PIAS2 - [PIAS2_HUMAN]	PIAS2
O75934	Pre-mRNA-splicing factor SPF27 OS=Homo sapiens GN=BCAS2 PE=1 SV=1 - [SPF27_HUMAN]	BCAS2	0.957487	0.938379	0.880459	2	5	5
O75937	DnaJ homolog subfamily C member 8 OS=Homo sapiens GN=DNAJC8 PE=1 SV=2 - [DNJC8_HUMAN]	DNAJC8	1.20426	1.00048	1.37037	5	7	4
O75940	Survival of motor neuron-related-splicing factor 30 OS=Homo sapiens GN=SMNDC1 PE=1 SV=1 - [SPF30_HUMAN]	SMNDC1	1.33499	1.30447	1.01769	1	1	2
O75947	ATP synthase subunit d, mitochondrial OS=Homo sapiens GN=ATP5H PE=1 SV=3 - [ATP5H_HUMAN]	ATP5H	1.08882	1.04187	1.11134	12	12	13
O75955	Flotillin-1 OS=Homo sapiens GN=FLOT1 PE=1 SV=3 - [FLOT1_HUMAN]	FLOT1	1.53172	1.48242	1.39773	9	7	8
O75962-5	Isoform 5 of Triple functional domain protein OS=Homo sapiens GN=TRIO - [TRIO_HUMAN]	TRIO			0.37269			1
O75964	ATP synthase subunit g, mitochondrial OS=Homo sapiens GN=ATP5L PE=1 SV=3 - [ATP5L_HUMAN]	ATP5L	0.590984	0.838173	1.02775	2	1	1
O75976	Carboxypeptidase D OS=Homo sapiens GN=CPD PE=1 SV=2 - [CBPD_HUMAN]	CPD	1.03885	1.00256	0.94489	8	10	13
O76003	Glutaredoxin-3 OS=Homo sapiens GN=GLRX3 PE=1 SV=2 - [GLRX3_HUMAN]	GLRX3	1.12508	1.17976	1.14536	12	16	11
O76021	Ribosomal L1 domain-containing protein 1 OS=Homo sapiens GN=RSL1D1 PE=1 SV=3 - [RL1D1_HUMAN]	RSL1D1	1.10478	1.12122	1.119	29	34	39
O76024	Wolframin OS=Homo sapiens GN=WFS1 PE=1 SV=2 - [WFS1_HUMAN]	WFS1	1.62536	1.1082	1.16903	1	3	3
O76031	ATP-dependent Clp protease ATP-binding subunit clpX-like, mitochondrial OS=Homo sapiens GN=CLPX PE=1 SV=2 - [CLPX_HUMAN]	CLPX	0.896658	0.865026	0.771601	5	5	6
O76041-2	Isoform 2 of Nebulette OS=Homo sapiens GN=NEBL - [NEBL_HUMAN]	NEBL		2.10987			1
O76054-5	Isoform 3 of SEC14-like protein 2 OS=Homo sapiens GN=SEC14L2 - [S14L2_HUMAN]	SEC14L2
O76070	Gamma-synuclein OS=Homo sapiens GN=SNCG PE=1 SV=2 - [SYUG_HUMAN]	SNCG	0.937108	0.98097	0.929423	11	13	11
O76071	Probable cytosolic iron-sulfur protein assembly protein CIAO1 OS=Homo sapiens GN=CIAO1 PE=1 SV=1 - [CIAO1_HUMAN]	CIAO1	1.19055	1.33846	1.20477	9	6	5
O76080	AN1-type zinc finger protein 5 OS=Homo sapiens GN=ZFAND5 PE=1 SV=1 - [ZFAN5_HUMAN]	ZFAND5
O76094	Signal recognition particle subunit SRP72 OS=Homo sapiens GN=SRP72 PE=1 SV=3 - [SRP72_HUMAN]	SRP72	0.976547	0.911832	0.909825	12	9	10
O76095-2	Isoform 2 of Protein JTB OS=Homo sapiens GN=JTB - [JTB_HUMAN]	JTB	0.6309	0.785978	0.831032	1	1	1
O94760-2	Isoform 2 of N(G),N(G)-dimethylarginine dimethylaminohydrolase 1 OS=Homo sapiens GN=DDAH1 - [DDAH1_HUMAN]	DDAH1			1.14223			1
O94763-2	Isoform 2 of Unconventional prefoldin RPB5 interactor 1 OS=Homo sapiens GN=URI1 - [RMP_HUMAN]	URI1	1.2637		1.15575	3		3
O94776	Metastasis-associated protein MTA2 OS=Homo sapiens GN=MTA2 PE=1 SV=1 - [MTA2_HUMAN]	MTA2	1.19144	1.00081	1.06691	6	10	8
O94804	Serine/threonine-protein kinase 10 OS=Homo sapiens GN=STK10 PE=1 SV=1 - [STK10_HUMAN]	STK10	1.13971	1.19282	1.06453	3	3	4
O94822	E3 ubiquitin-protein ligase listerin OS=Homo sapiens GN=LTN1 PE=1 SV=6 - [LTN1_HUMAN]	LTN1	0.990641	0.832624	0.675156	1	1	2
O94826	Mitochondrial import receptor subunit TOM70 OS=Homo sapiens GN=TOMM70A PE=1 SV=1 - [TOM70_HUMAN]	TOMM70A	1.10968	1.14058	1.16365	22	23	23
O94855	Protein transport protein Sec24D OS=Homo sapiens GN=SEC24D PE=1 SV=2 - [SC24D_HUMAN]	SEC24D	0.976791	0.506505	0.585082	1	1	1
O94874	E3 UFM1-protein ligase 1 OS=Homo sapiens GN=UFL1 PE=1 SV=2 - [UFL1_HUMAN]	UFL1			0.817466			7
O94888	UBX domain-containing protein 7 OS=Homo sapiens GN=UBXN7 PE=1 SV=2 - [UBXN7_HUMAN]	UBXN7	1.79637	1.56913	1.40118	2	4	3
O94900	Thymocyte selection-associated high mobility group box protein TOX OS=Homo sapiens GN=TOX PE=2 SV=3 - [TOX_HUMAN]	TOX			1.29744			1
O94901-6	Isoform 6 of SUN domain-containing protein 1 OS=Homo sapiens GN=SUN1 - [SUN1_HUMAN]	SUN1	1.42431	1.13346	1.13834	3	2	4
O94903	Proline synthase co-transcribed bacterial homolog protein OS=Homo sapiens GN=PROSC PE=1 SV=1 - [PROSC_HUMAN]	PROSC	1.049	1.51268	1.26237	5	4	4
O94905	Erlin-2 OS=Homo sapiens GN=ERLIN2 PE=1 SV=1 - [ERLN2_HUMAN]	ERLIN2	1.01348	1.0737	1.08724	6	5	6
O94906-2	Isoform 2 of Pre-mRNA-processing factor 6 OS=Homo sapiens GN=PRPF6 - [PRP6_HUMAN]	PRPF6	0.732745	0.853224	0.762899	7	9	8
O94915-2	Isoform 2 of Protein furry homolog-like OS=Homo sapiens GN=FRYL - [FRYL_HUMAN]	FRYL			0.969678			1
O94919	Endonuclease domain-containing 1 protein OS=Homo sapiens GN=ENDOD1 PE=1 SV=2 - [ENDD1_HUMAN]	ENDOD1	0.588408		1.26284	2		2
O94925	Glutaminase kidney isoform, mitochondrial OS=Homo sapiens GN=GLS PE=1 SV=1 - [GLSK_HUMAN]	GLS			2.2396			1
O94925-3	Isoform 3 of Glutaminase kidney isoform, mitochondrial OS=Homo sapiens GN=GLS - [GLSK_HUMAN]	GLS	1.00145	1.17693	0.574014	15	14	5
O94964-2	Isoform 2 of Protein SOGA1 OS=Homo sapiens GN=SOGA1 - [SOGA1_HUMAN]	SOGA1		1.14854			1
O94966-4	Isoform 4 of Ubiquitin carboxyl-terminal hydrolase 19 OS=Homo sapiens GN=USP19 - [UBP19_HUMAN]	USP19			0.866572			1
O94973	AP-2 complex subunit alpha-2 OS=Homo sapiens GN=AP2A2 PE=1 SV=2 - [AP2A2_HUMAN]	AP2A2	0.85193	0.86808	0.883369	13	12	11
O94979-3	Isoform 3 of Protein transport protein Sec31A OS=Homo sapiens GN=SEC31A - [SC31A_HUMAN]	SEC31A	0.883914		0.856558	16		12
O94992	Protein HEXIM1 OS=Homo sapiens GN=HEXIM1 PE=1 SV=1 - [HEXI1_HUMAN]	HEXIM1	0.787556	1.03143	0.86479	2	1	2
O95071-2	Isoform 2 of E3 ubiquitin-protein ligase UBR5 OS=Homo sapiens GN=UBR5 - [UBR5_HUMAN]	UBR5	0.858106	0.88257	0.716267	4	2	3
O95104-2	Isoform 2 of Splicing factor, arginine/serine-rich 15 OS=Homo sapiens GN=SCAF4 - [SFR15_HUMAN]	SCAF4		1.04344	1.13956		2	1
O95139	NADH dehydrogenase [ubiquinone] 1 beta subcomplex subunit 6 OS=Homo sapiens GN=NDUFB6 PE=1 SV=3 - [NDUB6_HUMAN]	NDUFB6	0.645401	2.87538	0.810203	1	2	1
O95154	Aflatoxin B1 aldehyde reductase member 3 OS=Homo sapiens GN=AKR7A3 PE=1 SV=2 - [ARK73_HUMAN]	AKR7A3	0.521108		0.855395	2		1
O95155-3	Isoform 3 of Ubiquitin conjugation factor E4 B OS=Homo sapiens GN=UBE4B - [UBE4B_HUMAN]	UBE4B	1.08895	1.09939	0.940064	1	3	1
O95159	Zinc finger protein-like 1 OS=Homo sapiens GN=ZFPL1 PE=1 SV=2 - [ZFPL1_HUMAN]	ZFPL1	1.09445	1.04249	0.995371	3	2	2
O95163	Elongator complex protein 1 OS=Homo sapiens GN=IKBKAP PE=1 SV=3 - [ELP1_HUMAN]	IKBKAP	0.0903637	1.51173	5.29851	1	3	2
O95182	NADH dehydrogenase [ubiquinone] 1 alpha subcomplex subunit 7 OS=Homo sapiens GN=NDUFA7 PE=1 SV=3 - [NDUA7_HUMAN]	NDUFA7	1.13353	1.26372	1.27428	3	4	1
O95183	Vesicle-associated membrane protein 5 OS=Homo sapiens GN=VAMP5 PE=1 SV=1 - [VAMP5_HUMAN]	VAMP5
O95197-3	Isoform 3 of Reticulon-3 OS=Homo sapiens GN=RTN3 - [RTN3_HUMAN]	RTN3	1.05792	1.04969	1.04399	5	5	5
O95202	LETM1 and EF-hand domain-containing protein 1, mitochondrial OS=Homo sapiens GN=LETM1 PE=1 SV=1 - [LETM1_HUMAN]	LETM1	1.2095	1.19755	1.12369	21	21	21
O95208-2	Isoform 2 of Epsin-2 OS=Homo sapiens GN=EPN2 - [EPN2_HUMAN]	EPN2			0.773374			1
O95210	Starch-binding domain-containing protein 1 OS=Homo sapiens GN=STBD1 PE=1 SV=1 - [STBD1_HUMAN]	STBD1			0.81557			1
O95218-2	Isoform 2 of Zinc finger Ran-binding domain-containing protein 2 OS=Homo sapiens GN=ZRANB2 - [ZRAB2_HUMAN]	ZRANB2	1.21309	0.954661	1.17115	4	3	6
O95219-2	Isoform 2 of Sorting nexin-4 OS=Homo sapiens GN=SNX4 - [SNX4_HUMAN]	SNX4	0.902375	0.99347	1.08771	3	1	4
O95232	Luc7-like protein 3 OS=Homo sapiens GN=LUC7L3 PE=1 SV=2 - [LC7L3_HUMAN]	LUC7L3	1.09009	1.13655	1.23766	13	12	9
O95239-2	Isoform 2 of Chromosome-associated kinesin KIF4A OS=Homo sapiens GN=KIF4A - [KIF4A_HUMAN]	KIF4A		0.606008			1
O95249	Golgi SNAP receptor complex member 1 OS=Homo sapiens GN=GOSR1 PE=1 SV=1 - [GOSR1_HUMAN]	GOSR1	0.839065	0.896405	0.867526	3	4	2
O95251-2	Isoform 2 of Histone acetyltransferase KAT7 OS=Homo sapiens GN=KAT7 - [KAT7_HUMAN]	KAT7
O95292	Vesicle-associated membrane protein-associated protein B/C OS=Homo sapiens GN=VAPB PE=1 SV=3 - [VAPB_HUMAN]	VAPB	0.862666	0.805369	0.863131	6	5	4
O95295	SNARE-associated protein Snapin OS=Homo sapiens GN=SNAPIN PE=1 SV=1 - [SNAPN_HUMAN]	SNAPIN	0.441675	0.865438	1.25445	1	4	3
O95297-4	Isoform 4 of Myelin protein zero-like protein 1 OS=Homo sapiens GN=MPZL1 - [MPZL1_HUMAN]	MPZL1			1.51177			1
O95298-3	Isoform 5 of NADH dehydrogenase [ubiquinone] 1 subunit C2 OS=Homo sapiens GN=NDUFC2 - [NDUC2_HUMAN]	NDUFC2
O95299	NADH dehydrogenase [ubiquinone] 1 alpha subcomplex subunit 10, mitochondrial OS=Homo sapiens GN=NDUFA10 PE=1 SV=1 - [NDUAA_HUMAN]	NDUFA10	1.019	0.675428	1.02805	3	2	3
O95302	Peptidyl-prolyl cis-trans isomerase FKBP9 OS=Homo sapiens GN=FKBP9 PE=1 SV=2 - [FKBP9_HUMAN]	FKBP9	0.7215	0.630263	0.712632	1	2	3
O95336	6-phosphogluconolactonase OS=Homo sapiens GN=PGLS PE=1 SV=2 - [6PGL_HUMAN]	PGLS	0.832212	0.898062	0.937034	13	13	14
O95340	Bifunctional 3'-phosphoadenosine 5'-phosphosulfate synthase 2 OS=Homo sapiens GN=PAPSS2 PE=1 SV=2 - [PAPS2_HUMAN]	PAPSS2	0.949537	0.982699	0.973332	10	13	12
O95347-2	Isoform 2 of Structural maintenance of chromosomes protein 2 OS=Homo sapiens GN=SMC2 - [SMC2_HUMAN]	SMC2	0.923352	0.96353	0.637556	3	6	4
O95352-3	Isoform 3 of Ubiquitin-like modifier-activating enzyme ATG7 OS=Homo sapiens GN=ATG7 - [ATG7_HUMAN]	ATG7	0.841162	0.789248	0.841476	6	4	5
O95359-3	Isoform 3 of Transforming acidic coiled-coil-containing protein 2 OS=Homo sapiens GN=TACC2 - [TACC2_HUMAN]	TACC2	1.41721	1.50887	2.27631	7	7	4
O95361	Tripartite motif-containing protein 16 OS=Homo sapiens GN=TRIM16 PE=1 SV=3 - [TRI16_HUMAN]	TRIM16	0.679352	0.791911	0.807508	10	9	10
O95365	Zinc finger and BTB domain-containing protein 7A OS=Homo sapiens GN=ZBTB7A PE=1 SV=1 - [ZBT7A_HUMAN]	ZBTB7A	1.23521	0.863875	1.30309	1	1	1
O95372	Acyl-protein thioesterase 2 OS=Homo sapiens GN=LYPLA2 PE=1 SV=1 - [LYPA2_HUMAN]	LYPLA2	0.934292	0.922841	1.00184	5	4	8
O95373	Importin-7 OS=Homo sapiens GN=IPO7 PE=1 SV=1 - [IPO7_HUMAN]	IPO7	1.01246	1.02348	1.00745	31	30	30
O95376	E3 ubiquitin-protein ligase ARIH2 OS=Homo sapiens GN=ARIH2 PE=1 SV=1 - [ARI2_HUMAN]	ARIH2	1.366	1.34525	1.33303	1	1	1
O95379-3	Isoform 3 of Tumor necrosis factor alpha-induced protein 8 OS=Homo sapiens GN=TNFAIP8 - [TFIP8_HUMAN]	TNFAIP8	1.18338		0.802356	1		1
O95394	Phosphoacetylglucosamine mutase OS=Homo sapiens GN=PGM3 PE=1 SV=1 - [AGM1_HUMAN]	PGM3	0.933298	1.00046	1.18316	3	6	4
O95395	Beta-1,3-galactosyl-O-glycosyl-glycoprotein beta-1,6-N-acetylglucosaminyltransferase 3 OS=Homo sapiens GN=GCNT3 PE=2 SV=1 - [GCNT3_HUMAN]	GCNT3	1.15603	1.27448	0.993667	2	2	2
O95396	Adenylyltransferase and sulfurtransferase MOCS3 OS=Homo sapiens GN=MOCS3 PE=1 SV=1 - [MOCS3_HUMAN]	MOCS3	1.32013	0.954083	0.511974	1	1	4
O95400	CD2 antigen cytoplasmic tail-binding protein 2 OS=Homo sapiens GN=CD2BP2 PE=1 SV=1 - [CD2B2_HUMAN]	CD2BP2	0.91005	1.08359	0.770501	2	1	2
O95415	Brain protein I3 OS=Homo sapiens GN=BRI3 PE=2 SV=1 - [BRI3_HUMAN]	BRI3	1.9945	1.63523	1.70252	1	1	1
O95433	Activator of 90 kDa heat shock protein ATPase homolog 1 OS=Homo sapiens GN=AHSA1 PE=1 SV=1 - [AHSA1_HUMAN]	AHSA1	0.993439	0.913669	0.968243	10	13	12
O95453-2	Isoform 2 of Poly(A)-specific ribonuclease PARN OS=Homo sapiens GN=PARN - [PARN_HUMAN]	PARN		1.26939			4
O95456-2	Isoform 2 of Proteasome assembly chaperone 1 OS=Homo sapiens GN=PSMG1 - [PSMG1_HUMAN]	PSMG1	0.847328	0.975353	0.953201	2	2	3
O95470	Sphingosine-1-phosphate lyase 1 OS=Homo sapiens GN=SGPL1 PE=1 SV=3 - [SGPL1_HUMAN]	SGPL1			1.26679			1
O95478	Ribosome biogenesis protein NSA2 homolog OS=Homo sapiens GN=NSA2 PE=1 SV=1 - [NSA2_HUMAN]	NSA2	1.50028	2.05233	1.42949	4	3	4
O95486	Protein transport protein Sec24A OS=Homo sapiens GN=SEC24A PE=1 SV=2 - [SC24A_HUMAN]	SEC24A	1.05771	0.899141	0.955945	4	5	5
O95487-2	Isoform 2 of Protein transport protein Sec24B OS=Homo sapiens GN=SEC24B - [SC24B_HUMAN]	SEC24B	0.799621	0.777416	0.880405	2	2	3
O95497	Pantetheinase OS=Homo sapiens GN=VNN1 PE=1 SV=2 - [VNN1_HUMAN]	VNN1	1.24355	1.21593	1.34228	2	4	2
O95551	Tyrosyl-DNA phosphodiesterase 2 OS=Homo sapiens GN=TDP2 PE=1 SV=1 - [TYDP2_HUMAN]	TDP2	1.59851	1.48527	1.70318	1	2	2
O95563	Mitochondrial pyruvate carrier 2 OS=Homo sapiens GN=MPC2 PE=1 SV=1 - [MPC2_HUMAN]	MPC2		0.784843	3.55686		1	1
O95571	Persulfide dioxygenase ETHE1, mitochondrial OS=Homo sapiens GN=ETHE1 PE=1 SV=2 - [ETHE1_HUMAN]	ETHE1	0.535002	0.333187	1.30934	1	2	1
O95573	Long-chain-fatty-acid--CoA ligase 3 OS=Homo sapiens GN=ACSL3 PE=1 SV=3 - [ACSL3_HUMAN]	ACSL3	1.22263	1.14499	1.03403	18	13	17
O95602	DNA-directed RNA polymerase I subunit RPA1 OS=Homo sapiens GN=POLR1A PE=1 SV=2 - [RPA1_HUMAN]	POLR1A	0.851616	0.904	0.817063	4	5	3
O95630	STAM-binding protein OS=Homo sapiens GN=STAMBP PE=1 SV=1 - [STABP_HUMAN]	STAMBP	0.862082	1.4933	0.702488	3	2	3
O95639-3	Isoform 3 of Cleavage and polyadenylation specificity factor subunit 4 OS=Homo sapiens GN=CPSF4 - [CPSF4_HUMAN]	CPSF4	1.14471	1.59202	1.42156	2	2	2
O95674	Phosphatidate cytidylyltransferase 2 OS=Homo sapiens GN=CDS2 PE=1 SV=1 - [CDS2_HUMAN]	CDS2	0.849848	1.06316	1.52368	2	2	1
O95721	Synaptosomal-associated protein 29 OS=Homo sapiens GN=SNAP29 PE=1 SV=1 - [SNP29_HUMAN]	SNAP29	1.78715	1.87366	1.11382	3	5	3
O95747	Serine/threonine-protein kinase OSR1 OS=Homo sapiens GN=OXSR1 PE=1 SV=1 - [OXSR1_HUMAN]	OXSR1	0.814731	0.613596	0.895359	3	2	3
O95749-2	Isoform 2 of Geranylgeranyl pyrophosphate synthase OS=Homo sapiens GN=GGPS1 - [GGPPS_HUMAN]	GGPS1			0.909421			1
O95757	Heat shock 70 kDa protein 4L OS=Homo sapiens GN=HSPA4L PE=1 SV=3 - [HS74L_HUMAN]	HSPA4L	0.938646	1.25628	1.38014	7	7	7
O95758-1	Isoform 1 of Polypyrimidine tract-binding protein 3 OS=Homo sapiens GN=PTBP3 - [PTBP3_HUMAN]	PTBP3	0.853691	0.878344	0.814167	4	6	6
O95777	U6 snRNA-associated Sm-like protein LSm8 OS=Homo sapiens GN=LSM8 PE=1 SV=3 - [LSM8_HUMAN]	LSM8	0.830644	0.732394	0.941957	4	3	5
O95782-2	Isoform B of AP-2 complex subunit alpha-1 OS=Homo sapiens GN=AP2A1 - [AP2A1_HUMAN]	AP2A1	1.03805	0.975526	1.09615	10	11	8
O95793-2	Isoform Short of Double-stranded RNA-binding protein Staufen homolog 1 OS=Homo sapiens GN=STAU1 - [STAU1_HUMAN]	STAU1	0.85375	0.89595	0.882313	14	12	15
O95810	Serum deprivation-response protein OS=Homo sapiens GN=SDPR PE=1 SV=3 - [SDPR_HUMAN]	SDPR	0.991477	1.0269	1.07297	4	3	4
O95816	BAG family molecular chaperone regulator 2 OS=Homo sapiens GN=BAG2 PE=1 SV=1 - [BAG2_HUMAN]	BAG2	0.90908	0.939205	0.962995	13	11	10
O95817	BAG family molecular chaperone regulator 3 OS=Homo sapiens GN=BAG3 PE=1 SV=3 - [BAG3_HUMAN]	BAG3	1.11845	1.10272	1.12593	22	21	20
O95831-3	Isoform 3 of Apoptosis-inducing factor 1, mitochondrial OS=Homo sapiens GN=AIFM1 - [AIFM1_HUMAN]	AIFM1	1.1693	1.16628	1.17617	22	23	24
O95834	Echinoderm microtubule-associated protein-like 2 OS=Homo sapiens GN=EML2 PE=1 SV=1 - [EMAL2_HUMAN]	EML2	1.09015		0.697333	1		2
O95861	3'(2'),5'-bisphosphate nucleotidase 1 OS=Homo sapiens GN=BPNT1 PE=1 SV=1 - [BPNT1_HUMAN]	BPNT1	0.959431	0.989375	0.905688	8	8	7
O95864	Fatty acid desaturase 2 OS=Homo sapiens GN=FADS2 PE=1 SV=1 - [FADS2_HUMAN]	FADS2	0.519478	0.275478	0.677893	3	1	3
O95865	N(G),N(G)-dimethylarginine dimethylaminohydrolase 2 OS=Homo sapiens GN=DDAH2 PE=1 SV=1 - [DDAH2_HUMAN]	DDAH2	1.78257			2
O95881	Thioredoxin domain-containing protein 12 OS=Homo sapiens GN=TXNDC12 PE=1 SV=1 - [TXD12_HUMAN]	TXNDC12	0.662633		0.927473	3		1
O95983-2	Isoform 2 of Methyl-CpG-binding domain protein 3 OS=Homo sapiens GN=MBD3 - [MBD3_HUMAN]	MBD3	1.47348	1.35642	0.859014	4	4	3
O95989	Diphosphoinositol polyphosphate phosphohydrolase 1 OS=Homo sapiens GN=NUDT3 PE=1 SV=1 - [NUDT3_HUMAN]	NUDT3			0.450469			1
O95994	Anterior gradient protein 2 homolog OS=Homo sapiens GN=AGR2 PE=1 SV=1 - [AGR2_HUMAN]	AGR2	0.648307	0.639434	0.64969	13	22	23
O96000	NADH dehydrogenase [ubiquinone] 1 beta subcomplex subunit 10 OS=Homo sapiens GN=NDUFB10 PE=1 SV=3 - [NDUBA_HUMAN]	NDUFB10	1.00271	1.09913	1.01766	9	7	6
O96005-3	Isoform 2 of Cleft lip and palate transmembrane protein 1 OS=Homo sapiens GN=CLPTM1 - [CLPT1_HUMAN]	CLPTM1	1.19787	1.07043	1.0168	5	3	4
O96008	Mitochondrial import receptor subunit TOM40 homolog OS=Homo sapiens GN=TOMM40 PE=1 SV=1 - [TOM40_HUMAN]	TOMM40	1.18725	1.1337	1.37601	10	7	6
O96009	Napsin-A OS=Homo sapiens GN=NAPSA PE=1 SV=1 - [NAPSA_HUMAN]	NAPSA			0.877009			1
O96011-2	Isoform 2 of Peroxisomal membrane protein 11B OS=Homo sapiens GN=PEX11B - [PX11B_HUMAN]	PEX11B	2.21873	1.03685		2	1
O96013	Serine/threonine-protein kinase PAK 4 OS=Homo sapiens GN=PAK4 PE=1 SV=1 - [PAK4_HUMAN]	PAK4			1.50917			4
O96019	Actin-like protein 6A OS=Homo sapiens GN=ACTL6A PE=1 SV=1 - [ACL6A_HUMAN]	ACTL6A	1.10442	1.10172	0.994134	7	5	7
P00156	Cytochrome b OS=Homo sapiens GN=MT-CYB PE=1 SV=2 - [CYB_HUMAN]	MT-CYB	1.25406	1.06695	1.14575	1	1	1
P00326	Alcohol dehydrogenase 1C OS=Homo sapiens GN=ADH1C PE=1 SV=2 - [ADH1G_HUMAN]	ADH1C	1.85112	1.90769	1.96201	10	11	11
P00338	L-lactate dehydrogenase A chain OS=Homo sapiens GN=LDHA PE=1 SV=2 - [LDHA_HUMAN]	LDHA	0.869269	0.826449	0.820316	38	39	42
P00352	Retinal dehydrogenase 1 OS=Homo sapiens GN=ALDH1A1 PE=1 SV=2 - [AL1A1_HUMAN]	ALDH1A1	1.25598	1.24307	1.24912	120	125	113
P00367	Glutamate dehydrogenase 1, mitochondrial OS=Homo sapiens GN=GLUD1 PE=1 SV=2 - [DHE3_HUMAN]	GLUD1	1.03364	1.16697	1.08282	23	24	25
P00374	Dihydrofolate reductase OS=Homo sapiens GN=DHFR PE=1 SV=2 - [DYR_HUMAN]	DHFR	1.3211		1.59855	3		5
P00387-2	Isoform 2 of NADH-cytochrome b5 reductase 3 OS=Homo sapiens GN=CYB5R3 - [NB5R3_HUMAN]	CYB5R3	1.04009	1.061	0.837702	14	11	12
P00390-2	Isoform Cytoplasmic of Glutathione reductase, mitochondrial OS=Homo sapiens GN=GSR - [GSHR_HUMAN]	GSR	1.01133	1.06722	1.05437	29	31	38
P00403	Cytochrome c oxidase subunit 2 OS=Homo sapiens GN=MT-CO2 PE=1 SV=1 - [COX2_HUMAN]	MT-CO2	1.12167	1.13167	1.06083	7	7	7
P00441	Superoxide dismutase [Cu-Zn] OS=Homo sapiens GN=SOD1 PE=1 SV=2 - [SODC_HUMAN]	SOD1	1.34173	1.28506	1.37586	16	15	19
P00450	Ceruloplasmin OS=Homo sapiens GN=CP PE=1 SV=1 - [CERU_HUMAN]	CP	0.724531	0.806503	0.716161	4	2	3
P00491	Purine nucleoside phosphorylase OS=Homo sapiens GN=PNP PE=1 SV=2 - [PNPH_HUMAN]	PNP	0.934535	0.915833	0.95733	20	18	22
P00492	Hypoxanthine-guanine phosphoribosyltransferase OS=Homo sapiens GN=HPRT1 PE=1 SV=2 - [HPRT_HUMAN]	HPRT1	0.787072	0.764797	0.784607	13	14	14
P00505	Aspartate aminotransferase, mitochondrial OS=Homo sapiens GN=GOT2 PE=1 SV=3 - [AATM_HUMAN]	GOT2	1.01465	1.05934	1.04594	21	19	22
P00533	Epidermal growth factor receptor OS=Homo sapiens GN=EGFR PE=1 SV=2 - [EGFR_HUMAN]	EGFR	1.2037	1.33239	1.24368	7	6	8
P00558	Phosphoglycerate kinase 1 OS=Homo sapiens GN=PGK1 PE=1 SV=3 - [PGK1_HUMAN]	PGK1	0.850258	0.84926	0.836275	111	107	107
P00568	Adenylate kinase isoenzyme 1 OS=Homo sapiens GN=AK1 PE=1 SV=3 - [KAD1_HUMAN]	AK1	0.932046	0.958074	0.983366	10	8	10
P00813	Adenosine deaminase OS=Homo sapiens GN=ADA PE=1 SV=3 - [ADA_HUMAN]	ADA	0.88346	1.60344	0.918952	2	3	4
P00846	ATP synthase subunit a OS=Homo sapiens GN=MT-ATP6 PE=1 SV=1 - [ATP6_HUMAN]	MT-ATP6	0.919474	0.971999	1.00672	2	2	1
P00918	Carbonic anhydrase 2 OS=Homo sapiens GN=CA2 PE=1 SV=2 - [CAH2_HUMAN]	CA2	2.97145	2.77903	2.76478	8	9	13
P00966	Argininosuccinate synthase OS=Homo sapiens GN=ASS1 PE=1 SV=2 - [ASSY_HUMAN]	ASS1	1.58479	2.45779	2.19292	6	2	7
P00973-2	Isoform p41 of 2'-5'-oligoadenylate synthase 1 OS=Homo sapiens GN=OAS1 - [OAS1_HUMAN]	OAS1	2.26899	2.04846	2.12126	11	11	10
P01023	Alpha-2-macroglobulin OS=Homo sapiens GN=A2M PE=1 SV=3 - [A2MG_HUMAN]	A2M
P01116-2	Isoform 2B of GTPase KRas OS=Homo sapiens GN=KRAS - [RASK_HUMAN]	KRAS	1.12897	1.0579	0.99863	5	4	4
P01130-2	Isoform 2 of Low-density lipoprotein receptor OS=Homo sapiens GN=LDLR - [LDLR_HUMAN]	LDLR	0.557493	0.647342	0.671213	3	4	2
P01892	HLA class I histocompatibility antigen, A-2 alpha chain OS=Homo sapiens GN=HLA-A PE=1 SV=1 - [1A02_HUMAN]	HLA-A	1.65698	1.5406	1.88021	3	5	4
P02545	Prelamin-A/C OS=Homo sapiens GN=LMNA PE=1 SV=1 - [LMNA_HUMAN]	LMNA	0.925567	0.924672	0.914957	11	12	11
P02545-2	Isoform C of Prelamin-A/C OS=Homo sapiens GN=LMNA - [LMNA_HUMAN]	LMNA	1.23255	1.25233	1.23792	4	7	6
P02751-17	Isoform 17 of Fibronectin OS=Homo sapiens GN=FN1 - [FINC_HUMAN]	FN1			0.723249			18
P02768	Serum albumin OS=Homo sapiens GN=ALB PE=1 SV=2 - [ALBU_HUMAN]	ALB	0.544974		0.506399	1		1
P02786	Transferrin receptor protein 1 OS=Homo sapiens GN=TFRC PE=1 SV=2 - [TFR1_HUMAN]	TFRC	1.0308	0.998448	1.00191	22	23	26
P02787	Serotransferrin OS=Homo sapiens GN=TF PE=1 SV=3 - [TRFE_HUMAN]	TF	0.538619			1
P02788-2	Isoform DeltaLf of Lactotransferrin OS=Homo sapiens GN=LTF - [TRFL_HUMAN]	LTF
P02792	Ferritin light chain OS=Homo sapiens GN=FTL PE=1 SV=2 - [FRIL_HUMAN]	FTL	3.29338	3.22459	3.0418	13	13	13
P02794	Ferritin heavy chain OS=Homo sapiens GN=FTH1 PE=1 SV=2 - [FRIH_HUMAN]	FTH1	1.81932	2.10832	1.84587	6	6	8
P03886	NADH-ubiquinone oxidoreductase chain 1 OS=Homo sapiens GN=MT-ND1 PE=1 SV=1 - [NU1M_HUMAN]	MT-ND1	0.858666	0.822653	0.751512	1	1	1
P03891	NADH-ubiquinone oxidoreductase chain 2 OS=Homo sapiens GN=MT-ND2 PE=1 SV=2 - [NU2M_HUMAN]	MT-ND2	0.420875		0.60723	1		1
P03928	ATP synthase protein 8 OS=Homo sapiens GN=MT-ATP8 PE=1 SV=1 - [ATP8_HUMAN]	MT-ATP8	1.1657	0.991069	1.12194	1	1	1
P04004	Vitronectin OS=Homo sapiens GN=VTN PE=1 SV=1 - [VTNC_HUMAN]	VTN
P04040	Catalase OS=Homo sapiens GN=CAT PE=1 SV=3 - [CATA_HUMAN]	CAT	0.82421	0.561993	0.717642	9	10	9
P04062-4	Isoform 4 of Glucosylceramidase OS=Homo sapiens GN=GBA - [GLCM_HUMAN]	GBA	1.66551	1.53132	1.4214	3	6	8
P04066	Tissue alpha-L-fucosidase OS=Homo sapiens GN=FUCA1 PE=1 SV=4 - [FUCO_HUMAN]	FUCA1	1.03839	1.9972	1.08948	4	2	3
P04075	Fructose-bisphosphate aldolase A OS=Homo sapiens GN=ALDOA PE=1 SV=2 - [ALDOA_HUMAN]	ALDOA	1.04734	1.06569	1.04034	52	57	62
P04080	Cystatin-B OS=Homo sapiens GN=CSTB PE=1 SV=2 - [CYTB_HUMAN]	CSTB	1.39799	1.39288	1.42787	11	12	12
P04083	Annexin A1 OS=Homo sapiens GN=ANXA1 PE=1 SV=2 - [ANXA1_HUMAN]	ANXA1	1.29825	1.27951	1.32036	79	68	72
P04150-7	Isoform GR-A beta of Glucocorticoid receptor OS=Homo sapiens GN=NR3C1 - [GCR_HUMAN]	NR3C1
P04150-9	Isoform Beta-B of Glucocorticoid receptor OS=Homo sapiens GN=NR3C1 - [GCR_HUMAN]	NR3C1			1.27362			1
P04156-2	Isoform 2 of Major prion protein OS=Homo sapiens GN=PRNP - [PRIO_HUMAN]	PRNP	0.938409	0.895837	0.871319	1	1	1
P04179-4	Isoform 4 of Superoxide dismutase [Mn], mitochondrial OS=Homo sapiens GN=SOD2 - [SODM_HUMAN]	SOD2	1.00525	1.06217	0.836266	6	7	9
P04181	Ornithine aminotransferase, mitochondrial OS=Homo sapiens GN=OAT PE=1 SV=1 - [OAT_HUMAN]	OAT	0.917466	1.01992	1.00101	6	5	7
P04183	Thymidine kinase, cytosolic OS=Homo sapiens GN=TK1 PE=1 SV=2 - [KITH_HUMAN]	TK1	1.25799	1.24793	1.22833	10	13	13
P04264	Keratin, type II cytoskeletal 1 OS=Homo sapiens GN=KRT1 PE=1 SV=6 - [K2C1_HUMAN]	KRT1
P04350	Tubulin beta-4A chain OS=Homo sapiens GN=TUBB4A PE=1 SV=2 - [TBB4A_HUMAN]	TUBB4A
P04406	Glyceraldehyde-3-phosphate dehydrogenase OS=Homo sapiens GN=GAPDH PE=1 SV=3 - [G3P_HUMAN]	GAPDH	1.08932	1.13813	0.914249	3	2	2
P04406-2	Isoform 2 of Glyceraldehyde-3-phosphate dehydrogenase OS=Homo sapiens GN=GAPDH - [G3P_HUMAN]	GAPDH	1.083	0.99075	0.990526	2	1	2
P04424-2	Isoform 2 of Argininosuccinate lyase OS=Homo sapiens GN=ASL - [ARLY_HUMAN]	ASL	0.683689	1.1769	0.776154	5	5	3
P04632	Calpain small subunit 1 OS=Homo sapiens GN=CAPNS1 PE=1 SV=1 - [CPNS1_HUMAN]	CAPNS1	0.886591	0.906433	0.939179	27	25	25
P04792	Heat shock protein beta-1 OS=Homo sapiens GN=HSPB1 PE=1 SV=2 - [HSPB1_HUMAN]	HSPB1	1.29972	1.32946	1.28959	31	32	29
P04818-3	Isoform 3 of Thymidylate synthase OS=Homo sapiens GN=TYMS - [TYSY_HUMAN]	TYMS		0.952071	0.728033		2	2
P04843	Dolichyl-diphosphooligosaccharide--protein glycosyltransferase subunit 1 OS=Homo sapiens GN=RPN1 PE=1 SV=1 - [RPN1_HUMAN]	RPN1	1.11818	1.11719	1.17163	30	32	31
P04844-2	Isoform 2 of Dolichyl-diphosphooligosaccharide--protein glycosyltransferase subunit 2 OS=Homo sapiens GN=RPN2 - [RPN2_HUMAN]	RPN2	1.01832	1.02713	1.07469	27	27	28
P04899	Guanine nucleotide-binding protein G(i) subunit alpha-2 OS=Homo sapiens GN=GNAI2 PE=1 SV=3 - [GNAI2_HUMAN]	GNAI2	1.16704	1.10559	1.03845	5	5	4
P04920-2	Isoform B1 of Anion exchange protein 2 OS=Homo sapiens GN=SLC4A2 - [B3A2_HUMAN]	SLC4A2	1.01217	0.666716	2.51077	1	1	1
P05023-3	Isoform 3 of Sodium/potassium-transporting ATPase subunit alpha-1 OS=Homo sapiens GN=ATP1A1 - [AT1A1_HUMAN]	ATP1A1	1.06455	1.03219	1.0969	35	37	35
P05026-2	Isoform 2 of Sodium/potassium-transporting ATPase subunit beta-1 OS=Homo sapiens GN=ATP1B1 - [AT1B1_HUMAN]	ATP1B1	1.17021	1.00739	1.06119	11	9	9
P05067-2	Isoform APP305 of Amyloid beta A4 protein OS=Homo sapiens GN=APP - [A4_HUMAN]	APP	0.809929		0.805503	2		2
P05091	Aldehyde dehydrogenase, mitochondrial OS=Homo sapiens GN=ALDH2 PE=1 SV=2 - [ALDH2_HUMAN]	ALDH2	1.0815	1.10395	1.10097	49	47	58
P05121-2	Isoform 2 of Plasminogen activator inhibitor 1 OS=Homo sapiens GN=SERPINE1 - [PAI1_HUMAN]	SERPINE1	1.07251	0.769023	1.08677	3	2	2
P05141	ADP/ATP translocase 2 OS=Homo sapiens GN=SLC25A5 PE=1 SV=7 - [ADT2_HUMAN]	SLC25A5	1.14991	1.11982	1.1396	38	37	37
P05161	Ubiquitin-like protein ISG15 OS=Homo sapiens GN=ISG15 PE=1 SV=5 - [ISG15_HUMAN]	ISG15	0.987518	1.05842	1.03467	4	4	5
P05166	Propionyl-CoA carboxylase beta chain, mitochondrial OS=Homo sapiens GN=PCCB PE=1 SV=3 - [PCCB_HUMAN]	PCCB	0.632281		0.827729	2		1
P05198	Eukaryotic translation initiation factor 2 subunit 1 OS=Homo sapiens GN=EIF2S1 PE=1 SV=3 - [IF2A_HUMAN]	EIF2S1	0.831554	0.879121	0.849873	20	18	23
P05362	Intercellular adhesion molecule 1 OS=Homo sapiens GN=ICAM1 PE=1 SV=2 - [ICAM1_HUMAN]	ICAM1	0.788635	0.910062	0.741919	6	6	4
P05386	60S acidic ribosomal protein P1 OS=Homo sapiens GN=RPLP1 PE=1 SV=1 - [RLA1_HUMAN]	RPLP1	1.21513	1.07153	1.08381	6	3	5
P05387	60S acidic ribosomal protein P2 OS=Homo sapiens GN=RPLP2 PE=1 SV=1 - [RLA2_HUMAN]	RPLP2	1.01507	0.998133	1.00731	19	20	19
P05388	60S acidic ribosomal protein P0 OS=Homo sapiens GN=RPLP0 PE=1 SV=1 - [RLA0_HUMAN]	RPLP0	1.04062	1.08159	1.02757	32	23	31
P05413	Fatty acid-binding protein, heart OS=Homo sapiens GN=FABP3 PE=1 SV=4 - [FABPH_HUMAN]	FABP3	7.61586	8.80054	8.76959	3	2	2
P05423	DNA-directed RNA polymerase III subunit RPC4 OS=Homo sapiens GN=POLR3D PE=1 SV=2 - [RPC4_HUMAN]	POLR3D	0.895691	0.887079	0.980634	2	2	1
P05455	Lupus La protein OS=Homo sapiens GN=SSB PE=1 SV=2 - [LA_HUMAN]	SSB	0.917111	0.945051	0.937037	49	44	47
P05534	HLA class I histocompatibility antigen, A-24 alpha chain OS=Homo sapiens GN=HLA-A PE=1 SV=2 - [1A24_HUMAN]	HLA-A	1.19378	1.21643	1.15764	4	6	4
P05556	Integrin beta-1 OS=Homo sapiens GN=ITGB1 PE=1 SV=2 - [ITB1_HUMAN]	ITGB1	0.852653	0.895605	0.823889	15	21	17
P05771	Protein kinase C beta type OS=Homo sapiens GN=PRKCB PE=1 SV=4 - [KPCB_HUMAN]	PRKCB	0.84949	0.945012	0.973021	3	2	1
P05783	Keratin, type I cytoskeletal 18 OS=Homo sapiens GN=KRT18 PE=1 SV=2 - [K1C18_HUMAN]	KRT18	0.719457	0.681025	0.710999	94	106	94
P05787	Keratin, type II cytoskeletal 8 OS=Homo sapiens GN=KRT8 PE=1 SV=7 - [K2C8_HUMAN]	KRT8	0.912636	0.940291	0.934892	125	125	139
P06132	Uroporphyrinogen decarboxylase OS=Homo sapiens GN=UROD PE=1 SV=2 - [DCUP_HUMAN]	UROD	0.666418	1.3122	0.728267	2	2	2
P06280	Alpha-galactosidase A OS=Homo sapiens GN=GLA PE=1 SV=1 - [AGAL_HUMAN]	GLA	1.26011	1.38256	1.0529	5	3	5
P06396-2	Isoform 2 of Gelsolin OS=Homo sapiens GN=GSN - [GELS_HUMAN]	GSN	0.777702	0.853556	0.726985	9	8	9
P06493	Cyclin-dependent kinase 1 OS=Homo sapiens GN=CDK1 PE=1 SV=3 - [CDK1_HUMAN]	CDK1	1.17256	1.30449	1.27096	9	14	10
P06576	ATP synthase subunit beta, mitochondrial OS=Homo sapiens GN=ATP5B PE=1 SV=3 - [ATPB_HUMAN]	ATP5B	1.09046	1.10502	1.08852	77	66	67
P06703	Protein S100-A6 OS=Homo sapiens GN=S100A6 PE=1 SV=1 - [S10A6_HUMAN]	S100A6	0.914087	0.907075	0.912664	25	28	19
P06730	Eukaryotic translation initiation factor 4E OS=Homo sapiens GN=EIF4E PE=1 SV=2 - [IF4E_HUMAN]	EIF4E	0.992665	0.849957	0.90284	3	4	6
P06731-2	Isoform 2 of Carcinoembryonic antigen-related cell adhesion molecule 5 OS=Homo sapiens GN=CEACAM5 - [CEAM5_HUMAN]	CEACAM5	2.89762	2.93535		2	1
P06733	Alpha-enolase OS=Homo sapiens GN=ENO1 PE=1 SV=2 - [ENOA_HUMAN]	ENO1	0.81082	0.858309	0.822214	102	22	95
P06737-2	Isoform 2 of Glycogen phosphorylase, liver form OS=Homo sapiens GN=PYGL - [PYGL_HUMAN]	PYGL	1.12315	0.958343	1.15957	6	6	5
P06744	Glucose-6-phosphate isomerase OS=Homo sapiens GN=GPI PE=1 SV=4 - [G6PI_HUMAN]	GPI	1.17903	1.20456	1.21666	65	59	62
P06748-2	Isoform 2 of Nucleophosmin OS=Homo sapiens GN=NPM1 - [NPM_HUMAN]	NPM1	1.20827	1.20033	1.19137	34	39	34
P06753-2	Isoform 2 of Tropomyosin alpha-3 chain OS=Homo sapiens GN=TPM3 - [TPM3_HUMAN]	TPM3	1.16578	1.20224	1.14584	37	36	35
P06756-3	Isoform 3 of Integrin alpha-V OS=Homo sapiens GN=ITGAV - [ITAV_HUMAN]	ITGAV	0.99469	0.911783	0.844878	9	8	7
P06865	Beta-hexosaminidase subunit alpha OS=Homo sapiens GN=HEXA PE=1 SV=2 - [HEXA_HUMAN]	HEXA	1.41366	1.63334	1.54939	9	9	6
P06899	Histone H2B type 1-J OS=Homo sapiens GN=HIST1H2BJ PE=1 SV=3 - [H2B1J_HUMAN]	HIST1H2BJ	1.27499	1.20929	1.20976	3	5	5
P07099	Epoxide hydrolase 1 OS=Homo sapiens GN=EPHX1 PE=1 SV=1 - [HYEP_HUMAN]	EPHX1	1.32175	1.3252	1.32973	45	38	46
P07108	Acyl-CoA-binding protein OS=Homo sapiens GN=DBI PE=1 SV=2 - [ACBP_HUMAN]	DBI	1.07764	1.10686	1.07251	19	20	16
P07195	L-lactate dehydrogenase B chain OS=Homo sapiens GN=LDHB PE=1 SV=2 - [LDHB_HUMAN]	LDHB	0.91195	0.906515	0.936598	71	72	67
P07199	Major centromere autoantigen B OS=Homo sapiens GN=CENPB PE=1 SV=2 - [CENPB_HUMAN]	CENPB	0.776711	1.24852	1.32338	1	1	1
P07237	Protein disulfide-isomerase OS=Homo sapiens GN=P4HB PE=1 SV=3 - [PDIA1_HUMAN]	P4HB	0.961299	0.947884	0.923614	93	95	89
P07305	Histone H1.0 OS=Homo sapiens GN=H1F0 PE=1 SV=3 - [H10_HUMAN]	H1F0	1.39922	1.28539	1.37942	6	3	6
P07311	Acylphosphatase-1 OS=Homo sapiens GN=ACYP1 PE=1 SV=2 - [ACYP1_HUMAN]	ACYP1	0.809262	0.572354		1	1
P07339	Cathepsin D OS=Homo sapiens GN=CTSD PE=1 SV=1 - [CATD_HUMAN]	CTSD	1.62446	1.5971	1.58447	39	37	39
P07355	Annexin A2 OS=Homo sapiens GN=ANXA2 PE=1 SV=2 - [ANXA2_HUMAN]	ANXA2	0.895684	0.913984	0.913779	145	134	144
P07384	Calpain-1 catalytic subunit OS=Homo sapiens GN=CAPN1 PE=1 SV=1 - [CAN1_HUMAN]	CAPN1	0.773164	0.856555	0.838321	14	16	14
P07437	Tubulin beta chain OS=Homo sapiens GN=TUBB PE=1 SV=2 - [TBB5_HUMAN]	TUBB	1.05799	1.11029	1.12275	20	14	12
P07477	Trypsin-1 OS=Homo sapiens GN=PRSS1 PE=1 SV=1 - [TRY1_HUMAN]	PRSS1
P07602	Prosaposin OS=Homo sapiens GN=PSAP PE=1 SV=2 - [SAP_HUMAN]	PSAP	1.35087	1.36176	1.30986	41	44	39
P07686	Beta-hexosaminidase subunit beta OS=Homo sapiens GN=HEXB PE=1 SV=3 - [HEXB_HUMAN]	HEXB	1.53452	1.52008	1.34224	7	5	10
P07711	Cathepsin L1 OS=Homo sapiens GN=CTSL PE=1 SV=2 - [CATL1_HUMAN]	CTSL	1.20533	1.22415	1.54866	3	3	1
P07737	Profilin-1 OS=Homo sapiens GN=PFN1 PE=1 SV=2 - [PROF1_HUMAN]	PFN1	1.0071	0.989609	1.04834	47	46	50
P07741	Adenine phosphoribosyltransferase OS=Homo sapiens GN=APRT PE=1 SV=2 - [APT_HUMAN]	APRT	1.03971	1.04517	0.986407	15	14	14
P07814	Bifunctional glutamate/proline--tRNA ligase OS=Homo sapiens GN=EPRS PE=1 SV=5 - [SYEP_HUMAN]	EPRS	0.868594	0.892943	0.875722	56	65	70
P07858	Cathepsin B OS=Homo sapiens GN=CTSB PE=1 SV=3 - [CATB_HUMAN]	CTSB	1.30214	1.35579	1.26532	23	26	26
P07900	Heat shock protein HSP 90-alpha OS=Homo sapiens GN=HSP90AA1 PE=1 SV=5 - [HS90A_HUMAN]	HSP90AA1	1.14943	1.10463	1.12046	70	71	84
P07910-2	Isoform C1 of Heterogeneous nuclear ribonucleoproteins C1/C2 OS=Homo sapiens GN=HNRNPC - [HNRPC_HUMAN]	HNRNPC	1.00755	1.04741	1.03639	32	34	36
P07919	Cytochrome b-c1 complex subunit 6, mitochondrial OS=Homo sapiens GN=UQCRH PE=1 SV=2 - [QCR6_HUMAN]	UQCRH	1.05318	1.16288	1.18311	4	4	5
P07942	Laminin subunit beta-1 OS=Homo sapiens GN=LAMB1 PE=1 SV=2 - [LAMB1_HUMAN]	LAMB1	1.00783	1.00159	0.986442	12	11	11
P07947	Tyrosine-protein kinase Yes OS=Homo sapiens GN=YES1 PE=1 SV=3 - [YES_HUMAN]	YES1	0.882231	3.83048	1.0984	2	1	1
P07948-2	Isoform 2 of Tyrosine-protein kinase Lyn OS=Homo sapiens GN=LYN - [LYN_HUMAN]	LYN	1.22941	1.12275	0.958782	3	6	2
P07951-2	Isoform 2 of Tropomyosin beta chain OS=Homo sapiens GN=TPM2 - [TPM2_HUMAN]	TPM2	0.610235	0.660077	0.624559	3	4	3
P07954-2	Isoform Cytoplasmic of Fumarate hydratase, mitochondrial OS=Homo sapiens GN=FH - [FUMH_HUMAN]	FH	0.95027	0.974981	0.934665	19	24	19
P08047-3	Isoform 3 of Transcription factor Sp1 OS=Homo sapiens GN=SP1 - [SP1_HUMAN]	SP1		0.55081	1.13834		1	1
P08133-2	Isoform 2 of Annexin A6 OS=Homo sapiens GN=ANXA6 - [ANXA6_HUMAN]	ANXA6	0.708409		0.468224	1		1
P08134	Rho-related GTP-binding protein RhoC OS=Homo sapiens GN=RHOC PE=1 SV=1 - [RHOC_HUMAN]	RHOC	1.12558	1.17092	1.10491	1	1	1
P08174-4	Isoform 4 of Complement decay-accelerating factor OS=Homo sapiens GN=CD55 - [DAF_HUMAN]	CD55
P08183-2	Isoform 2 of Multidrug resistance protein 1 OS=Homo sapiens GN=ABCB1 - [MDR1_HUMAN]	ABCB1	2.11306	2.24472	2.05977	3	4	3
P08195-2	Isoform 2 of 4F2 cell-surface antigen heavy chain OS=Homo sapiens GN=SLC3A2 - [4F2_HUMAN]	SLC3A2	1.03987	1.02498	1.00704	28	35	34
P08236-3	Isoform 3 of Beta-glucuronidase OS=Homo sapiens GN=GUSB - [BGLR_HUMAN]	GUSB			0.907245			2
P08237	ATP-dependent 6-phosphofructokinase, muscle type OS=Homo sapiens GN=PFKM PE=1 SV=2 - [PFKAM_HUMAN]	PFKM			0.710108			15
P08238	Heat shock protein HSP 90-beta OS=Homo sapiens GN=HSP90AB1 PE=1 SV=4 - [HS90B_HUMAN]	HSP90AB1	1.03023	1.00024	1.02701	75	67	71
P08240-2	Isoform 2 of Signal recognition particle receptor subunit alpha OS=Homo sapiens GN=SRPR - [SRPR_HUMAN]	SRPR	1.28598	1.24062	1.19459	2	2	2
P08243-2	Isoform 2 of Asparagine synthetase [glutamine-hydrolyzing] OS=Homo sapiens GN=ASNS - [ASNS_HUMAN]	ASNS	0.659318	0.514387	0.603506	16	14	14
P08263	Glutathione S-transferase A1 OS=Homo sapiens GN=GSTA1 PE=1 SV=3 - [GSTA1_HUMAN]	GSTA1	0.876503	0.963231	0.985521	5	5	7
P08397-2	Isoform 2 of Porphobilinogen deaminase OS=Homo sapiens GN=HMBS - [HEM3_HUMAN]	HMBS	0.734117	0.942599	0.828357	5	5	3
P08559	Pyruvate dehydrogenase E1 component subunit alpha, somatic form, mitochondrial OS=Homo sapiens GN=PDHA1 PE=1 SV=3 - [ODPA_HUMAN]	PDHA1		0.787353	0.894837		8	10
P08574	Cytochrome c1, heme protein, mitochondrial OS=Homo sapiens GN=CYC1 PE=1 SV=3 - [CY1_HUMAN]	CYC1	1.09362	1.12544	1.20545	7	6	9
P08579	U2 small nuclear ribonucleoprotein B'' OS=Homo sapiens GN=SNRPB2 PE=1 SV=1 - [RU2B_HUMAN]	SNRPB2	0.978554	0.823379	0.71195	2	3	5
P08581	Hepatocyte growth factor receptor OS=Homo sapiens GN=MET PE=1 SV=4 - [MET_HUMAN]	MET	0.941404	0.971751	0.90325	36	45	36
P08621	U1 small nuclear ribonucleoprotein 70 kDa OS=Homo sapiens GN=SNRNP70 PE=1 SV=2 - [RU17_HUMAN]	SNRNP70	0.975334	1.04432	1.02819	9	11	10
P08648	Integrin alpha-5 OS=Homo sapiens GN=ITGA5 PE=1 SV=2 - [ITA5_HUMAN]	ITGA5
P08651-4	Isoform 3 of Nuclear factor 1 C-type OS=Homo sapiens GN=NFIC - [NFIC_HUMAN]	NFIC	0.911775		1.06497	3		2
P08727	Keratin, type I cytoskeletal 19 OS=Homo sapiens GN=KRT19 PE=1 SV=4 - [K1C19_HUMAN]	KRT19	0.629137	0.646665	0.629349	49	44	44
P08729	Keratin, type II cytoskeletal 7 OS=Homo sapiens GN=KRT7 PE=1 SV=5 - [K2C7_HUMAN]	KRT7	0.777817	0.717736	0.809729	11	9	12
P08754	Guanine nucleotide-binding protein G(k) subunit alpha OS=Homo sapiens GN=GNAI3 PE=1 SV=3 - [GNAI3_HUMAN]	GNAI3	1.11358	1.05793	0.865721	1	1	2
P08758	Annexin A5 OS=Homo sapiens GN=ANXA5 PE=1 SV=2 - [ANXA5_HUMAN]	ANXA5	0.926973	0.964429	0.948392	58	51	51
P08865	40S ribosomal protein SA OS=Homo sapiens GN=RPSA PE=1 SV=4 - [RSSA_HUMAN]	RPSA	0.991042	0.976131	1.06064	29	29	33
P08962-3	Isoform 3 of CD63 antigen OS=Homo sapiens GN=CD63 - [CD63_HUMAN]	CD63	2.23728	2.03156	2.504	2	1	5
P09001	39S ribosomal protein L3, mitochondrial OS=Homo sapiens GN=MRPL3 PE=1 SV=1 - [RM03_HUMAN]	MRPL3	0.979187	0.944415	0.578875	3	6	3
P09012	U1 small nuclear ribonucleoprotein A OS=Homo sapiens GN=SNRPA PE=1 SV=3 - [SNRPA_HUMAN]	SNRPA	1.01271	0.993332	0.896805	6	4	3
P09104-2	Isoform 2 of Gamma-enolase OS=Homo sapiens GN=ENO2 - [ENOG_HUMAN]	ENO2	1.24541	1.46847	1.29565	3	3	3
P09110	3-ketoacyl-CoA thiolase, peroxisomal OS=Homo sapiens GN=ACAA1 PE=1 SV=2 - [THIK_HUMAN]	ACAA1	1.21215	1.18789	1.1634	12	12	10
P09132	Signal recognition particle 19 kDa protein OS=Homo sapiens GN=SRP19 PE=1 SV=3 - [SRP19_HUMAN]	SRP19			1.5193			2
P09211	Glutathione S-transferase P OS=Homo sapiens GN=GSTP1 PE=1 SV=2 - [GSTP1_HUMAN]	GSTP1	1.06634	1.01879	1.03875	19	20	23
P09234	U1 small nuclear ribonucleoprotein C OS=Homo sapiens GN=SNRPC PE=1 SV=1 - [RU1C_HUMAN]	SNRPC	1.14463	1.2149	1.1734	4	2	3
P09327	Villin-1 OS=Homo sapiens GN=VIL1 PE=1 SV=4 - [VILI_HUMAN]	VIL1	0.857227	0.835363	0.785185	8	9	9
P09382	Galectin-1 OS=Homo sapiens GN=LGALS1 PE=1 SV=2 - [LEG1_HUMAN]	LGALS1	0.538798	0.580369	0.569095	21	19	13
P09417	Dihydropteridine reductase OS=Homo sapiens GN=QDPR PE=1 SV=2 - [DHPR_HUMAN]	QDPR	1.10259	1.0256	1.20172	2	4	3
P09429	High mobility group protein B1 OS=Homo sapiens GN=HMGB1 PE=1 SV=3 - [HMGB1_HUMAN]	HMGB1	1.10465	1.14927	1.15022	21	19	19
P09467	Fructose-1,6-bisphosphatase 1 OS=Homo sapiens GN=FBP1 PE=1 SV=5 - [F16P1_HUMAN]	FBP1	1.60989	1.35342	1.71951	1	1	1
P09493-3	Isoform 3 of Tropomyosin alpha-1 chain OS=Homo sapiens GN=TPM1 - [TPM1_HUMAN]	TPM1	1.49597		1.47147	2		2
P09493-5	Isoform 5 of Tropomyosin alpha-1 chain OS=Homo sapiens GN=TPM1 - [TPM1_HUMAN]	TPM1		0.758017	0.59114		1	1
P09496-5	Isoform 5 of Clathrin light chain A OS=Homo sapiens GN=CLTA - [CLCA_HUMAN]	CLTA	0.956799	1.02554	0.979351	5	6	4
P09497-2	Isoform Non-brain of Clathrin light chain B OS=Homo sapiens GN=CLTB - [CLCB_HUMAN]	CLTB			0.735298			1
P09525	Annexin A4 OS=Homo sapiens GN=ANXA4 PE=1 SV=4 - [ANXA4_HUMAN]	ANXA4	0.889054	0.913562	0.906317	33	32	35
P09543-2	Isoform CNPI of 2',3'-cyclic-nucleotide 3'-phosphodiesterase OS=Homo sapiens GN=CNP - [CN37_HUMAN]	CNP	1.21786	1.36896	1.40976	10	12	13
P09601	Heme oxygenase 1 OS=Homo sapiens GN=HMOX1 PE=1 SV=1 - [HMOX1_HUMAN]	HMOX1	1.25279	1.174	1.23181	28	22	23
P09622-3	Isoform 3 of Dihydrolipoyl dehydrogenase, mitochondrial OS=Homo sapiens GN=DLD - [DLDH_HUMAN]	DLD	1.02487	1.0251	1.04875	23	30	29
P09651-3	Isoform 2 of Heterogeneous nuclear ribonucleoprotein A1 OS=Homo sapiens GN=HNRNPA1 - [ROA1_HUMAN]	HNRNPA1	1.02964	1.02718	1.0664	57	61	61
P09661	U2 small nuclear ribonucleoprotein A' OS=Homo sapiens GN=SNRPA1 PE=1 SV=2 - [RU2A_HUMAN]	SNRPA1	1.18247	1.22216	1.19945	10	7	9
P09669	Cytochrome c oxidase subunit 6C OS=Homo sapiens GN=COX6C PE=1 SV=2 - [COX6C_HUMAN]	COX6C	1.13956	0.915882	1.00328	4	6	7
P09874	Poly [ADP-ribose] polymerase 1 OS=Homo sapiens GN=PARP1 PE=1 SV=4 - [PARP1_HUMAN]	PARP1	0.851509	0.852883	0.835634	45	36	39
P09936	Ubiquitin carboxyl-terminal hydrolase isozyme L1 OS=Homo sapiens GN=UCHL1 PE=1 SV=2 - [UCHL1_HUMAN]	UCHL1	0.891417	0.916682	0.90244	36	38	31
P09960	Leukotriene A-4 hydrolase OS=Homo sapiens GN=LTA4H PE=1 SV=2 - [LKHA4_HUMAN]	LTA4H	1.01283	0.99154	1.00362	23	23	24
P09972	Fructose-bisphosphate aldolase C OS=Homo sapiens GN=ALDOC PE=1 SV=2 - [ALDOC_HUMAN]	ALDOC	0.917261	0.99214	1.01355	21	18	18
P0C0S5	Histone H2A.Z OS=Homo sapiens GN=H2AFZ PE=1 SV=2 - [H2AZ_HUMAN]	H2AFZ	1.25004	1.30378	1.28557	6	7	6
P0CG12	Chromosome transmission fidelity protein 8 homolog isoform 2 OS=Homo sapiens GN=CHTF8 PE=1 SV=1 - [CTF8A_HUMAN]	CHTF8		0.801837	0.465702		1	1
P0CG29	Glutathione S-transferase theta-2 OS=Homo sapiens GN=GSTT2 PE=1 SV=1 - [GST2_HUMAN]	GSTT2	0.760647		0.662773	1		1
P0CW22	40S ribosomal protein S17-like OS=Homo sapiens GN=RPS17L PE=1 SV=1 - [RS17L_HUMAN]	RPS17L	1.00987	1.05208	1.10516	24	21	18
P0DI82	Trafficking protein particle complex subunit 2B OS=Homo sapiens GN=TRAPPC2B PE=1 SV=1 - [TPC2B_HUMAN]	TRAPPC2B			0.822586			2
P0DMN0	Sulfotransferase 1A4 OS=Homo sapiens GN=SULT1A4 PE=1 SV=1 - [ST1A4_HUMAN]	SULT1A4	1.05978	1.01256	1.09463	3	3	3
P0DMP2	SLIT-ROBO Rho GTPase-activating protein 2B OS=Homo sapiens GN=SRGAP2B PE=3 SV=1 - [SRG2B_HUMAN]	SRGAP2B	0.968113	1.49578	1.26902	3	1	2
P0DMV8	Heat shock 70 kDa protein 1A OS=Homo sapiens GN=HSPA1A PE=1 SV=1 - [HS71A_HUMAN]	HSPA1A	1.14702	1.13247	1.11157	84	63	68
P10155	60 kDa SS-A/Ro ribonucleoprotein OS=Homo sapiens GN=TROVE2 PE=1 SV=2 - [RO60_HUMAN]	TROVE2	0.907932	0.962624	0.919447	9	8	8
P10253	Lysosomal alpha-glucosidase OS=Homo sapiens GN=GAA PE=1 SV=4 - [LYAG_HUMAN]	GAA	0.825219	0.74588	0.591869	1	4	3
P10301	Ras-related protein R-Ras OS=Homo sapiens GN=RRAS PE=1 SV=1 - [RRAS_HUMAN]	RRAS	1.99508	1.96398	2.05795	1	1	1
P10398	Serine/threonine-protein kinase A-Raf OS=Homo sapiens GN=ARAF PE=1 SV=2 - [ARAF_HUMAN]	ARAF	0.902193	1.02805	0.817076	4	2	3
P10412	Histone H1.4 OS=Homo sapiens GN=HIST1H1E PE=1 SV=2 - [H14_HUMAN]	HIST1H1E	1.16383	1.17405	1.19036	6	5	5
P10451-3	Isoform C of Osteopontin OS=Homo sapiens GN=SPP1 - [OSTP_HUMAN]	SPP1	0.962524	0.911628	1.03543	1	1	1
P10515	Dihydrolipoyllysine-residue acetyltransferase component of pyruvate dehydrogenase complex, mitochondrial OS=Homo sapiens GN=DLAT PE=1 SV=3 - [ODP2_HUMAN]	DLAT	1.06315	1.09532	1.07629	13	11	14
P10599	Thioredoxin OS=Homo sapiens GN=TXN PE=1 SV=3 - [THIO_HUMAN]	TXN	1.15272	1.23397	1.19788	23	22	24
P10606	Cytochrome c oxidase subunit 5B, mitochondrial OS=Homo sapiens GN=COX5B PE=1 SV=2 - [COX5B_HUMAN]	COX5B	1.08929	1.05585	0.894232	8	10	5
P10619-2	Isoform 2 of Lysosomal protective protein OS=Homo sapiens GN=CTSA - [PPGB_HUMAN]	CTSA	1.35679	1.37527	1.42927	9	4	7
P10620	Microsomal glutathione S-transferase 1 OS=Homo sapiens GN=MGST1 PE=1 SV=1 - [MGST1_HUMAN]	MGST1			1.23467			13
P10644	cAMP-dependent protein kinase type I-alpha regulatory subunit OS=Homo sapiens GN=PRKAR1A PE=1 SV=1 - [KAP0_HUMAN]	PRKAR1A	0.878278	0.967437	1.03432	8	9	6
P10768	S-formylglutathione hydrolase OS=Homo sapiens GN=ESD PE=1 SV=2 - [ESTD_HUMAN]	ESD	0.974033	1.01618	1.08872	7	8	7
P10809	60 kDa heat shock protein, mitochondrial OS=Homo sapiens GN=HSPD1 PE=1 SV=2 - [CH60_HUMAN]	HSPD1	1.1265	1.12141	1.12513	188	190	198
P10909-3	Isoform 3 of Clusterin OS=Homo sapiens GN=CLU - [CLUS_HUMAN]	CLU	0.821175	0.896056	0.801465	2	3	4
P11021	78 kDa glucose-regulated protein OS=Homo sapiens GN=HSPA5 PE=1 SV=2 - [GRP78_HUMAN]	HSPA5	0.921482	0.916787	0.908992	87	80	85
P11047	Laminin subunit gamma-1 OS=Homo sapiens GN=LAMC1 PE=1 SV=3 - [LAMC1_HUMAN]	LAMC1	0.970127		0.394336	2		1
P11137-2	Isoform 2 of Microtubule-associated protein 2 OS=Homo sapiens GN=MAP2 - [MTAP2_HUMAN]	MAP2	0.804047	0.844975	0.832407	2	1	3
P11142	Heat shock cognate 71 kDa protein OS=Homo sapiens GN=HSPA8 PE=1 SV=1 - [HSP7C_HUMAN]	HSPA8	0.884815	0.910256	0.909093	94	89	96
P11166	Solute carrier family 2, facilitated glucose transporter member 1 OS=Homo sapiens GN=SLC2A1 PE=1 SV=2 - [GTR1_HUMAN]	SLC2A1	0.976773	1.08598	1.08409	7	8	8
P11171-6	Isoform 6 of Protein 4.1 OS=Homo sapiens GN=EPB41 - [41_HUMAN]	EPB41	1.14899			1
P11172	Uridine 5'-monophosphate synthase OS=Homo sapiens GN=UMPS PE=1 SV=1 - [UMPS_HUMAN]	UMPS	0.922318	0.893561	0.842467	7	11	11
P11177-2	Isoform 2 of Pyruvate dehydrogenase E1 component subunit beta, mitochondrial OS=Homo sapiens GN=PDHB - [ODPB_HUMAN]	PDHB	1.08734	1.14071	1.25061	11	11	10
P11182	Lipoamide acyltransferase component of branched-chain alpha-keto acid dehydrogenase complex, mitochondrial OS=Homo sapiens GN=DBT PE=1 SV=3 - [ODB2_HUMAN]	DBT	1.04473	1.26574	0.752849	1	1	1
P11216	Glycogen phosphorylase, brain form OS=Homo sapiens GN=PYGB PE=1 SV=5 - [PYGB_HUMAN]	PYGB	0.880452	0.870228	0.892304	107	112	99
P11217	Glycogen phosphorylase, muscle form OS=Homo sapiens GN=PYGM PE=1 SV=6 - [PYGM_HUMAN]	PYGM
P11233	Ras-related protein Ral-A OS=Homo sapiens GN=RALA PE=1 SV=1 - [RALA_HUMAN]	RALA	1.47001	1.02252	1.00617	2	1	2
P11234	Ras-related protein Ral-B OS=Homo sapiens GN=RALB PE=1 SV=1 - [RALB_HUMAN]	RALB	1.2973	1.13242	1.31003	3	3	2
P11279	Lysosome-associated membrane glycoprotein 1 OS=Homo sapiens GN=LAMP1 PE=1 SV=3 - [LAMP1_HUMAN]	LAMP1			1.58396			3
P11310	Medium-chain specific acyl-CoA dehydrogenase, mitochondrial OS=Homo sapiens GN=ACADM PE=1 SV=1 - [ACADM_HUMAN]	ACADM	1.6225	1.52936	1.32646	4	3	5
P11387	DNA topoisomerase 1 OS=Homo sapiens GN=TOP1 PE=1 SV=2 - [TOP1_HUMAN]	TOP1	1.00465	0.957973	0.804592	13	12	14
P11388	DNA topoisomerase 2-alpha OS=Homo sapiens GN=TOP2A PE=1 SV=3 - [TOP2A_HUMAN]	TOP2A	1.43349	1.30994	1.34872	14	12	13
P11413	Glucose-6-phosphate 1-dehydrogenase OS=Homo sapiens GN=G6PD PE=1 SV=4 - [G6PD_HUMAN]	G6PD	1.03909	1.04392	1.04445	158	154	157
P11498	Pyruvate carboxylase, mitochondrial OS=Homo sapiens GN=PC PE=1 SV=2 - [PYC_HUMAN]	PC	0.754226	0.769449	0.754204	37	39	38
P11586	C-1-tetrahydrofolate synthase, cytoplasmic OS=Homo sapiens GN=MTHFD1 PE=1 SV=3 - [C1TC_HUMAN]	MTHFD1	0.934893	0.948236	0.908224	25	26	31
P11717	Cation-independent mannose-6-phosphate receptor OS=Homo sapiens GN=IGF2R PE=1 SV=3 - [MPRI_HUMAN]	IGF2R	0.946339	0.986033	1.04441	17	18	20
P11766	Alcohol dehydrogenase class-3 OS=Homo sapiens GN=ADH5 PE=1 SV=4 - [ADHX_HUMAN]	ADH5	1.05725	0.998017	1.00048	16	16	16
P11908	Ribose-phosphate pyrophosphokinase 2 OS=Homo sapiens GN=PRPS2 PE=1 SV=2 - [PRPS2_HUMAN]	PRPS2	1.06639	1.17011		1	1
P11940	Polyadenylate-binding protein 1 OS=Homo sapiens GN=PABPC1 PE=1 SV=2 - [PABP1_HUMAN]	PABPC1	1.0416	0.990307	0.959412	28	36	34
P12004	Proliferating cell nuclear antigen OS=Homo sapiens GN=PCNA PE=1 SV=1 - [PCNA_HUMAN]	PCNA	1.133	1.09209	1.15713	17	17	16
P12081-4	Isoform 4 of Histidine--tRNA ligase, cytoplasmic OS=Homo sapiens GN=HARS - [SYHC_HUMAN]	HARS	0.948829	1.02102	0.843068	9	12	11
P12109	Collagen alpha-1(VI) chain OS=Homo sapiens GN=COL6A1 PE=1 SV=3 - [CO6A1_HUMAN]	COL6A1	1.07103	1.20471	1.24548	21	19	18
P12235	ADP/ATP translocase 1 OS=Homo sapiens GN=SLC25A4 PE=1 SV=4 - [ADT1_HUMAN]	SLC25A4	1.09375	1.0446	1.0529	3	2	2
P12236	ADP/ATP translocase 3 OS=Homo sapiens GN=SLC25A6 PE=1 SV=4 - [ADT3_HUMAN]	SLC25A6	1.09838	1.19475	0.971098	10	8	9
P12268	Inosine-5'-monophosphate dehydrogenase 2 OS=Homo sapiens GN=IMPDH2 PE=1 SV=2 - [IMDH2_HUMAN]	IMPDH2	1.00077	1.03467	1.02508	27	30	29
P12270	Nucleoprotein TPR OS=Homo sapiens GN=TPR PE=1 SV=3 - [TPR_HUMAN]	TPR	1.08985	1.03511	1.01137	46	42	48
P12429	Annexin A3 OS=Homo sapiens GN=ANXA3 PE=1 SV=3 - [ANXA3_HUMAN]	ANXA3	1.75558	1.93468	1.55638	4	1	2
P12814	Alpha-actinin-1 OS=Homo sapiens GN=ACTN1 PE=1 SV=2 - [ACTN1_HUMAN]	ACTN1	1.07956	1.01642	1.04687	24	31	27
P12931	Proto-oncogene tyrosine-protein kinase Src OS=Homo sapiens GN=SRC PE=1 SV=3 - [SRC_HUMAN]	SRC	1.06966	1.0967	1.1226	16	15	14
P12955	Xaa-Pro dipeptidase OS=Homo sapiens GN=PEPD PE=1 SV=3 - [PEPD_HUMAN]	PEPD	1.82168	1.91195	1.85495	15	17	15
P12956	X-ray repair cross-complementing protein 6 OS=Homo sapiens GN=XRCC6 PE=1 SV=2 - [XRCC6_HUMAN]	XRCC6	1.04109	1.03859	1.0291	46	45	47
P13010	X-ray repair cross-complementing protein 5 OS=Homo sapiens GN=XRCC5 PE=1 SV=3 - [XRCC5_HUMAN]	XRCC5	0.998057	0.997797	0.973764	53	53	54
P13051-2	Isoform 1 of Uracil-DNA glycosylase OS=Homo sapiens GN=UNG - [UNG_HUMAN]	UNG	0.843017		1.48404	1		1
P13073	Cytochrome c oxidase subunit 4 isoform 1, mitochondrial OS=Homo sapiens GN=COX4I1 PE=1 SV=1 - [COX41_HUMAN]	COX4I1	0.990199	0.989792	1.00758	9	12	12
P13473	Lysosome-associated membrane glycoprotein 2 OS=Homo sapiens GN=LAMP2 PE=1 SV=2 - [LAMP2_HUMAN]	LAMP2	1.64839	1.64287	1.68428	6	8	7
P13489	Ribonuclease inhibitor OS=Homo sapiens GN=RNH1 PE=1 SV=2 - [RINI_HUMAN]	RNH1	1.03154	0.987464	1.01191	26	30	29
P13639	Elongation factor 2 OS=Homo sapiens GN=EEF2 PE=1 SV=4 - [EF2_HUMAN]	EEF2	0.97104	0.961561	0.961131	96	101	94
P13645	Keratin, type I cytoskeletal 10 OS=Homo sapiens GN=KRT10 PE=1 SV=6 - [K1C10_HUMAN]	KRT10
P13667	Protein disulfide-isomerase A4 OS=Homo sapiens GN=PDIA4 PE=1 SV=2 - [PDIA4_HUMAN]	PDIA4	0.919998	0.94286	0.912765	44	40	43
P13674-3	Isoform 3 of Prolyl 4-hydroxylase subunit alpha-1 OS=Homo sapiens GN=P4HA1 - [P4HA1_HUMAN]	P4HA1	0.937404	1.07224	1.30304	1	2	1
P13688-2	Isoform 2 of Carcinoembryonic antigen-related cell adhesion molecule 1 OS=Homo sapiens GN=CEACAM1 - [CEAM1_HUMAN]	CEACAM1	1.74998	1.38057	1.4439	4	3	2
P13693	Translationally-controlled tumor protein OS=Homo sapiens GN=TPT1 PE=1 SV=1 - [TCTP_HUMAN]	TPT1	1.19731	1.14153	1.15631	9	8	9
P13716	Delta-aminolevulinic acid dehydratase OS=Homo sapiens GN=ALAD PE=1 SV=1 - [HEM2_HUMAN]	ALAD			0.515436			2
P13796	Plastin-2 OS=Homo sapiens GN=LCP1 PE=1 SV=6 - [PLSL_HUMAN]	LCP1	5.32072	5.27983	3.80572	2	3	3
P13797	Plastin-3 OS=Homo sapiens GN=PLS3 PE=1 SV=4 - [PLST_HUMAN]	PLS3	0.87696	0.848262	0.874691	37	41	45
P13798	Acylamino-acid-releasing enzyme OS=Homo sapiens GN=APEH PE=1 SV=4 - [ACPH_HUMAN]	APEH	0.88223	0.971139	0.805975	2	2	2
P13804	Electron transfer flavoprotein subunit alpha, mitochondrial OS=Homo sapiens GN=ETFA PE=1 SV=1 - [ETFA_HUMAN]	ETFA	1.28302	1.30942	1.29092	36	40	38
P13807-2	Isoform 2 of Glycogen [starch] synthase, muscle OS=Homo sapiens GN=GYS1 - [GYS1_HUMAN]	GYS1	0.860222	1.13112	0.953532	1	2	1
P13861-2	Isoform 2 of cAMP-dependent protein kinase type II-alpha regulatory subunit OS=Homo sapiens GN=PRKAR2A - [KAP2_HUMAN]	PRKAR2A	1.00431	1.11051	1.23125	16	13	16
P13984	General transcription factor IIF subunit 2 OS=Homo sapiens GN=GTF2F2 PE=1 SV=2 - [T2FB_HUMAN]	GTF2F2	1.02474	1.05467	0.972786	2	1	2
P13987	CD59 glycoprotein OS=Homo sapiens GN=CD59 PE=1 SV=1 - [CD59_HUMAN]	CD59	1.10245	1.23975	1.15173	5	6	5
P14174	Macrophage migration inhibitory factor OS=Homo sapiens GN=MIF PE=1 SV=4 - [MIF_HUMAN]	MIF	0.807033	0.731741	0.74212	17	14	12
P14314-2	Isoform 2 of Glucosidase 2 subunit beta OS=Homo sapiens GN=PRKCSH - [GLU2B_HUMAN]	PRKCSH	1.12838	1.05397	1.04341	20	20	22
P14324-2	Isoform 2 of Farnesyl pyrophosphate synthase OS=Homo sapiens GN=FDPS - [FPPS_HUMAN]	FDPS	1.00785	1.03077	1.01811	11	11	14
P14373-2	Isoform Beta of Zinc finger protein RFP OS=Homo sapiens GN=TRIM27 - [TRI27_HUMAN]	TRIM27			1.01626			5
P14406	Cytochrome c oxidase subunit 7A2, mitochondrial OS=Homo sapiens GN=COX7A2 PE=1 SV=1 - [CX7A2_HUMAN]	COX7A2	1.14745	0.719261	0.912529	2	1	2
P14550	Alcohol dehydrogenase [NADP(+)] OS=Homo sapiens GN=AKR1A1 PE=1 SV=3 - [AK1A1_HUMAN]	AKR1A1	1.04502	1.05811	0.883118	8	5	5
P14618	Pyruvate kinase PKM OS=Homo sapiens GN=PKM PE=1 SV=4 - [KPYM_HUMAN]	PKM	0.886166	0.891654	0.877819	205	21	23
P14618-2	Isoform M1 of Pyruvate kinase PKM OS=Homo sapiens GN=PKM - [KPYM_HUMAN]	PKM
P14625	Endoplasmin OS=Homo sapiens GN=HSP90B1 PE=1 SV=1 - [ENPL_HUMAN]	HSP90B1	0.917973	0.941856	0.937047	79	76	77
P14635-2	Isoform 2 of G2/mitotic-specific cyclin-B1 OS=Homo sapiens GN=CCNB1 - [CCNB1_HUMAN]	CCNB1	1.25652		1.05146	1		2
P14678-2	Isoform SM-B of Small nuclear ribonucleoprotein-associated proteins B and B' OS=Homo sapiens GN=SNRPB - [RSMB_HUMAN]	SNRPB	1.00849	1.07386	1.04534	13	13	14
P14735	Insulin-degrading enzyme OS=Homo sapiens GN=IDE PE=1 SV=4 - [IDE_HUMAN]	IDE	0.607031	0.605609	0.80173	8	5	8
P14854	Cytochrome c oxidase subunit 6B1 OS=Homo sapiens GN=COX6B1 PE=1 SV=2 - [CX6B1_HUMAN]	COX6B1	0.978695	1.08853	1.02391	6	6	6
P14866	Heterogeneous nuclear ribonucleoprotein L OS=Homo sapiens GN=HNRNPL PE=1 SV=2 - [HNRPL_HUMAN]	HNRNPL	1.13332	1.11263	1.18576	21	21	21
P14868	Aspartate--tRNA ligase, cytoplasmic OS=Homo sapiens GN=DARS PE=1 SV=2 - [SYDC_HUMAN]	DARS	0.925433	0.932448	0.878434	31	30	29
P14923	Junction plakoglobin OS=Homo sapiens GN=JUP PE=1 SV=3 - [PLAK_HUMAN]	JUP	0.904213	0.869862	0.890098	19	17	18
P14927	Cytochrome b-c1 complex subunit 7 OS=Homo sapiens GN=UQCRB PE=1 SV=2 - [QCR7_HUMAN]	UQCRB	1.0512	1.06143	1.05914	6	5	5
P15104	Glutamine synthetase OS=Homo sapiens GN=GLUL PE=1 SV=4 - [GLNA_HUMAN]	GLUL	0.918881	0.885238	0.930954	6	6	9
P15121	Aldose reductase OS=Homo sapiens GN=AKR1B1 PE=1 SV=3 - [ALDR_HUMAN]	AKR1B1	0.76787	0.779791	0.792114	41	44	47
P15144	Aminopeptidase N OS=Homo sapiens GN=ANPEP PE=1 SV=4 - [AMPN_HUMAN]	ANPEP	1.99823	0.771896	1.94629	3	1	2
P15151-3	Isoform Gamma of Poliovirus receptor OS=Homo sapiens GN=PVR - [PVR_HUMAN]	PVR		0.746438	0.95282		2	1
P15170-2	Isoform 2 of Eukaryotic peptide chain release factor GTP-binding subunit ERF3A OS=Homo sapiens GN=GSPT1 - [ERF3A_HUMAN]	GSPT1	0.978364	1.16432	1.08655	13	6	7
P15289-2	Isoform 2 of Arylsulfatase A OS=Homo sapiens GN=ARSA - [ARSA_HUMAN]	ARSA			2.14804			1
P15291-2	Isoform Short of Beta-1,4-galactosyltransferase 1 OS=Homo sapiens GN=B4GALT1 - [B4GT1_HUMAN]	B4GALT1		0.812564	1.02496		2	1
P15311	Ezrin OS=Homo sapiens GN=EZR PE=1 SV=4 - [EZRI_HUMAN]	EZR	1.3744	1.39682	1.37483	27	24	28
P15374	Ubiquitin carboxyl-terminal hydrolase isozyme L3 OS=Homo sapiens GN=UCHL3 PE=1 SV=1 - [UCHL3_HUMAN]	UCHL3	0.682197	0.782743	0.703042	2	1	3
P15407	Fos-related antigen 1 OS=Homo sapiens GN=FOSL1 PE=1 SV=1 - [FOSL1_HUMAN]	FOSL1			2.07821			1
P15428-5	Isoform 5 of 15-hydroxyprostaglandin dehydrogenase [NAD(+)] OS=Homo sapiens GN=HPGD - [PGDH_HUMAN]	HPGD	0.662032	0.737118	0.702394	4	3	4
P15559-3	Isoform 3 of NAD(P)H dehydrogenase [quinone] 1 OS=Homo sapiens GN=NQO1 - [NQO1_HUMAN]	NQO1	0.729169	0.586908	0.72842	7	5	9
P15586	N-acetylglucosamine-6-sulfatase OS=Homo sapiens GN=GNS PE=1 SV=3 - [GNS_HUMAN]	GNS	1.42043	1.41091	1.38611	13	14	14
P15880	40S ribosomal protein S2 OS=Homo sapiens GN=RPS2 PE=1 SV=2 - [RS2_HUMAN]	RPS2	1.00305	0.998065	1.00664	31	33	37
P15924	Desmoplakin OS=Homo sapiens GN=DSP PE=1 SV=3 - [DESP_HUMAN]	DSP	0.974558	0.883244	0.869097	32	35	35
P15927	Replication protein A 32 kDa subunit OS=Homo sapiens GN=RPA2 PE=1 SV=1 - [RFA2_HUMAN]	RPA2	0.899445	0.909013	0.939392	2	2	3
P15954	Cytochrome c oxidase subunit 7C, mitochondrial OS=Homo sapiens GN=COX7C PE=1 SV=1 - [COX7C_HUMAN]	COX7C
P16070-18	Isoform 18 of CD44 antigen OS=Homo sapiens GN=CD44 - [CD44_HUMAN]	CD44	1.4735	1.49336	1.47697	8	10	9
P16083	Ribosyldihydronicotinamide dehydrogenase [quinone] OS=Homo sapiens GN=NQO2 PE=1 SV=5 - [NQO2_HUMAN]	NQO2	1.39461	1.81643	1.42409	2	1	2
P16104	Histone H2AX OS=Homo sapiens GN=H2AFX PE=1 SV=2 - [H2AX_HUMAN]	H2AFX	1.26943	1.24746	1.29587	8	9	7
P16144-4	Isoform Beta-4D of Integrin beta-4 OS=Homo sapiens GN=ITGB4 - [ITB4_HUMAN]	ITGB4	0.833439	0.834431	0.858397	13	15	12
P16152	Carbonyl reductase [NADPH] 1 OS=Homo sapiens GN=CBR1 PE=1 SV=3 - [CBR1_HUMAN]	CBR1	1.14399	1.12004	1.14667	35	29	35
P16219	Short-chain specific acyl-CoA dehydrogenase, mitochondrial OS=Homo sapiens GN=ACADS PE=1 SV=1 - [ACADS_HUMAN]	ACADS	1.28949	1.01922	1.01078	2	2	1
P16278-3	Isoform 3 of Beta-galactosidase OS=Homo sapiens GN=GLB1 - [BGAL_HUMAN]	GLB1	1.04016	1.14647	1.11085	7	7	7
P16284-5	Isoform Delta14-15 of Platelet endothelial cell adhesion molecule OS=Homo sapiens GN=PECAM1 - [PECA1_HUMAN]	PECAM1		0.990514			2
P16333	Cytoplasmic protein NCK1 OS=Homo sapiens GN=NCK1 PE=1 SV=1 - [NCK1_HUMAN]	NCK1	0.841926	0.632459	1.09527	1	1	2
P16401	Histone H1.5 OS=Homo sapiens GN=HIST1H1B PE=1 SV=3 - [H15_HUMAN]	HIST1H1B	1.49091	1.45621	1.42565	16	19	18
P16402	Histone H1.3 OS=Homo sapiens GN=HIST1H1D PE=1 SV=2 - [H13_HUMAN]	HIST1H1D	0.691192	1.18047	1.13411	2	2	1
P16403	Histone H1.2 OS=Homo sapiens GN=HIST1H1C PE=1 SV=2 - [H12_HUMAN]	HIST1H1C	0.470562		0.985291	2		1
P16435	NADPH--cytochrome P450 reductase OS=Homo sapiens GN=POR PE=1 SV=2 - [NCPR_HUMAN]	POR	1.3452	1.34881	1.31903	47	44	40
P16455	Methylated-DNA--protein-cysteine methyltransferase OS=Homo sapiens GN=MGMT PE=1 SV=1 - [MGMT_HUMAN]	MGMT	1.09617	0.861586	1.02834	1	2	1
P16615	Sarcoplasmic/endoplasmic reticulum calcium ATPase 2 OS=Homo sapiens GN=ATP2A2 PE=1 SV=1 - [AT2A2_HUMAN]	ATP2A2	0.882282	0.914596	0.890189	54	56	52
P16662	UDP-glucuronosyltransferase 2B7 OS=Homo sapiens GN=UGT2B7 PE=1 SV=1 - [UD2B7_HUMAN]	UGT2B7	0.658965	0.60836		1	1
P16930	Fumarylacetoacetase OS=Homo sapiens GN=FAH PE=1 SV=2 - [FAAA_HUMAN]	FAH	1.22733	1.34871	1.16051	13	10	14
P17096	High mobility group protein HMG-I/HMG-Y OS=Homo sapiens GN=HMGA1 PE=1 SV=3 - [HMGA1_HUMAN]	HMGA1	0.894641	0.932499	0.858376	6	8	8
P17096-2	Isoform HMG-Y of High mobility group protein HMG-I/HMG-Y OS=Homo sapiens GN=HMGA1 - [HMGA1_HUMAN]	HMGA1	0.832394	0.790724	0.761458	1	1	1
P17174	Aspartate aminotransferase, cytoplasmic OS=Homo sapiens GN=GOT1 PE=1 SV=3 - [AATC_HUMAN]	GOT1	0.890666	0.866892	0.815299	15	18	21
P17252	Protein kinase C alpha type OS=Homo sapiens GN=PRKCA PE=1 SV=4 - [KPCA_HUMAN]	PRKCA	0.775777	0.742938	0.813294	10	6	5
P17301	Integrin alpha-2 OS=Homo sapiens GN=ITGA2 PE=1 SV=1 - [ITA2_HUMAN]	ITGA2	0.79653	0.443512	0.49046	1	3	3
P17480-2	Isoform UBF2 of Nucleolar transcription factor 1 OS=Homo sapiens GN=UBTF - [UBF1_HUMAN]	UBTF	0.697293	0.739957	0.793266	9	8	8
P17568	NADH dehydrogenase [ubiquinone] 1 beta subcomplex subunit 7 OS=Homo sapiens GN=NDUFB7 PE=1 SV=4 - [NDUB7_HUMAN]	NDUFB7			0.692548			1
P17612-2	Isoform 2 of cAMP-dependent protein kinase catalytic subunit alpha OS=Homo sapiens GN=PRKACA - [KAPCA_HUMAN]	PRKACA		0.711347	0.452024		1	1
P17655	Calpain-2 catalytic subunit OS=Homo sapiens GN=CAPN2 PE=1 SV=6 - [CAN2_HUMAN]	CAPN2	0.946884	0.961676	0.981979	36	33	35
P17676-3	Isoform 3 of CCAAT/enhancer-binding protein beta OS=Homo sapiens GN=CEBPB - [CEBPB_HUMAN]	CEBPB
P17706-3	Isoform 3 of Tyrosine-protein phosphatase non-receptor type 2 OS=Homo sapiens GN=PTPN2 - [PTN2_HUMAN]	PTPN2		0.506714	0.353514		3	1
P17812	CTP synthase 1 OS=Homo sapiens GN=CTPS1 PE=1 SV=2 - [PYRG1_HUMAN]	CTPS1	0.744044	0.837149	0.843367	15	13	12
P17844	Probable ATP-dependent RNA helicase DDX5 OS=Homo sapiens GN=DDX5 PE=1 SV=1 - [DDX5_HUMAN]	DDX5	1.03023	1.01355	1.0157	31	31	31
P17858	ATP-dependent 6-phosphofructokinase, liver type OS=Homo sapiens GN=PFKL PE=1 SV=6 - [PFKAL_HUMAN]	PFKL	1.01361	0.863158	0.942632	11	10	9
P17900	Ganglioside GM2 activator OS=Homo sapiens GN=GM2A PE=1 SV=4 - [SAP3_HUMAN]	GM2A	1.49652		1.38062	1		1
P17931	Galectin-3 OS=Homo sapiens GN=LGALS3 PE=1 SV=5 - [LEG3_HUMAN]	LGALS3	1.04698	1.07722	1.11895	11	14	13
P17980	26S protease regulatory subunit 6A OS=Homo sapiens GN=PSMC3 PE=1 SV=3 - [PRS6A_HUMAN]	PSMC3	1.0249	0.985881	0.955053	24	25	26
P17987	T-complex protein 1 subunit alpha OS=Homo sapiens GN=TCP1 PE=1 SV=1 - [TCPA_HUMAN]	TCP1	1.03197	1.00626	1.03114	53	41	50
P18031	Tyrosine-protein phosphatase non-receptor type 1 OS=Homo sapiens GN=PTPN1 PE=1 SV=1 - [PTN1_HUMAN]	PTPN1	0.825592	0.848479	0.775834	12	13	16
P18065	Insulin-like growth factor-binding protein 2 OS=Homo sapiens GN=IGFBP2 PE=1 SV=2 - [IBP2_HUMAN]	IGFBP2			0.799078			1
P18077	60S ribosomal protein L35a OS=Homo sapiens GN=RPL35A PE=1 SV=2 - [RL35A_HUMAN]	RPL35A	1.06663	1.19555	1.03247	3	2	4
P18084	Integrin beta-5 OS=Homo sapiens GN=ITGB5 PE=1 SV=1 - [ITB5_HUMAN]	ITGB5
P18085	ADP-ribosylation factor 4 OS=Homo sapiens GN=ARF4 PE=1 SV=3 - [ARF4_HUMAN]	ARF4	1.17681	1.24127	1.20041	10	8	6
P18124	60S ribosomal protein L7 OS=Homo sapiens GN=RPL7 PE=1 SV=1 - [RL7_HUMAN]	RPL7	1.04165	1.04465	1.0463	41	45	47
P18206-2	Isoform 1 of Vinculin OS=Homo sapiens GN=VCL - [VINC_HUMAN]	VCL	0.84419	0.914847	0.926173	38	36	36
P18283	Glutathione peroxidase 2 OS=Homo sapiens GN=GPX2 PE=1 SV=3 - [GPX2_HUMAN]	GPX2	0.516458	1.07064	1.32413	1	2	1
P18440	Arylamine N-acetyltransferase 1 OS=Homo sapiens GN=NAT1 PE=1 SV=2 - [ARY1_HUMAN]	NAT1	0.891122	1.2376	1.28826	1	1	1
P18583-2	Isoform A of Protein SON OS=Homo sapiens GN=SON - [SON_HUMAN]	SON	0.937583	1.21701	1.08377	3	2	4
P18615-4	Isoform 3 of Negative elongation factor E OS=Homo sapiens GN=NELFE - [NELFE_HUMAN]	NELFE	0.789634		1.34859	2		2
P18621	60S ribosomal protein L17 OS=Homo sapiens GN=RPL17 PE=1 SV=3 - [RL17_HUMAN]	RPL17	1.06164	1.0957	1.06443	24	22	24
P18669	Phosphoglycerate mutase 1 OS=Homo sapiens GN=PGAM1 PE=1 SV=2 - [PGAM1_HUMAN]	PGAM1	0.807095	0.881319	0.882909	30	25	32
P18754	Regulator of chromosome condensation OS=Homo sapiens GN=RCC1 PE=1 SV=1 - [RCC1_HUMAN]	RCC1	1.19424	1.13949	1.19429	13	16	15
P18827	Syndecan-1 OS=Homo sapiens GN=SDC1 PE=1 SV=3 - [SDC1_HUMAN]	SDC1	1.15561	1.24998	1.18888	1	3	2
P18858-2	Isoform 2 of DNA ligase 1 OS=Homo sapiens GN=LIG1 - [DNLI1_HUMAN]	LIG1	1.7792	1.59903	2.07872	2	1	2
P18859	ATP synthase-coupling factor 6, mitochondrial OS=Homo sapiens GN=ATP5J PE=1 SV=1 - [ATP5J_HUMAN]	ATP5J	1.07162	1.10289	1.05615	5	5	5
P18887	DNA repair protein XRCC1 OS=Homo sapiens GN=XRCC1 PE=1 SV=2 - [XRCC1_HUMAN]	XRCC1	1.28496	1.18595	1.30902	4	2	3
P19022-2	Isoform 2 of Cadherin-2 OS=Homo sapiens GN=CDH2 - [CADH2_HUMAN]	CDH2	1.10924		0.704768	5		3
P19075	Tetraspanin-8 OS=Homo sapiens GN=TSPAN8 PE=1 SV=1 - [TSN8_HUMAN]	TSPAN8	1.60767	1.75352	1.84736	2	2	2
P19105	Myosin regulatory light chain 12A OS=Homo sapiens GN=MYL12A PE=1 SV=2 - [ML12A_HUMAN]	MYL12A	0.988079	0.958687	1.06024	16	20	21
P19224-3	Isoform 3 of UDP-glucuronosyltransferase 1-6 OS=Homo sapiens GN=UGT1A6 - [UD16_HUMAN]	UGT1A6	1.3562	1.27893	1.22567	14	11	9
P19338	Nucleolin OS=Homo sapiens GN=NCL PE=1 SV=3 - [NUCL_HUMAN]	NCL	1.05235	1.08577	1.07281	43	44	46
P19367	Hexokinase-1 OS=Homo sapiens GN=HK1 PE=1 SV=3 - [HXK1_HUMAN]	HK1	0.944606	0.991455	0.940009	26	29	31
P19387	DNA-directed RNA polymerase II subunit RPB3 OS=Homo sapiens GN=POLR2C PE=1 SV=2 - [RPB3_HUMAN]	POLR2C	0.896532	0.918473	0.902404	1	1	1
P19388	DNA-directed RNA polymerases I, II, and III subunit RPABC1 OS=Homo sapiens GN=POLR2E PE=1 SV=4 - [RPAB1_HUMAN]	POLR2E	0.918365	0.700773	1.05453	3	2	2
P19404	NADH dehydrogenase [ubiquinone] flavoprotein 2, mitochondrial OS=Homo sapiens GN=NDUFV2 PE=1 SV=2 - [NDUV2_HUMAN]	NDUFV2	0.822342	0.918625	2.45838	4	4	3
P19447	TFIIH basal transcription factor complex helicase XPB subunit OS=Homo sapiens GN=ERCC3 PE=1 SV=1 - [ERCC3_HUMAN]	ERCC3			0.681729			1
P19474	E3 ubiquitin-protein ligase TRIM21 OS=Homo sapiens GN=TRIM21 PE=1 SV=1 - [RO52_HUMAN]	TRIM21	1.10049	0.70852	0.626084	2	2	1
P19525	Interferon-induced, double-stranded RNA-activated protein kinase OS=Homo sapiens GN=EIF2AK2 PE=1 SV=2 - [E2AK2_HUMAN]	EIF2AK2		0.963811	0.974523		16	10
P19623	Spermidine synthase OS=Homo sapiens GN=SRM PE=1 SV=1 - [SPEE_HUMAN]	SRM	0.961872	0.834788	0.879687	9	5	12
P19784	Casein kinase II subunit alpha' OS=Homo sapiens GN=CSNK2A2 PE=1 SV=1 - [CSK22_HUMAN]	CSNK2A2	1.12857	1.16174	1.28413	3	2	4
P19823	Inter-alpha-trypsin inhibitor heavy chain H2 OS=Homo sapiens GN=ITIH2 PE=1 SV=2 - [ITIH2_HUMAN]	ITIH2	0.239721			1
P19838	Nuclear factor NF-kappa-B p105 subunit OS=Homo sapiens GN=NFKB1 PE=1 SV=2 - [NFKB1_HUMAN]	NFKB1	1.03397	0.844345	0.724857	2	5	3
P20020-6	Isoform K of Plasma membrane calcium-transporting ATPase 1 OS=Homo sapiens GN=ATP2B1 - [AT2B1_HUMAN]	ATP2B1	0.958452	1.02367	0.899857	12	18	12
P20042	Eukaryotic translation initiation factor 2 subunit 2 OS=Homo sapiens GN=EIF2S2 PE=1 SV=2 - [IF2B_HUMAN]	EIF2S2	0.874551	0.907025	0.803256	15	14	16
P20073-2	Isoform 2 of Annexin A7 OS=Homo sapiens GN=ANXA7 - [ANXA7_HUMAN]	ANXA7	1.02555	1.04852	0.966201	7	10	12
P20226-2	Isoform 2 of TATA-box-binding protein OS=Homo sapiens GN=TBP - [TBP_HUMAN]	TBP	0.863179		0.806381	1		1
P20290-2	Isoform 2 of Transcription factor BTF3 OS=Homo sapiens GN=BTF3 - [BTF3_HUMAN]	BTF3			0.842741			5
P20337	Ras-related protein Rab-3B OS=Homo sapiens GN=RAB3B PE=1 SV=2 - [RAB3B_HUMAN]	RAB3B	0.950192	0.839709	0.856992	4	2	3
P20338	Ras-related protein Rab-4A OS=Homo sapiens GN=RAB4A PE=1 SV=3 - [RAB4A_HUMAN]	RAB4A		0.646178			1
P20340	Ras-related protein Rab-6A OS=Homo sapiens GN=RAB6A PE=1 SV=3 - [RAB6A_HUMAN]	RAB6A	1.02799	1.03747	0.883402	3	2	4
P20618	Proteasome subunit beta type-1 OS=Homo sapiens GN=PSMB1 PE=1 SV=2 - [PSB1_HUMAN]	PSMB1	0.906311	0.905833	0.953318	15	13	13
P20645	Cation-dependent mannose-6-phosphate receptor OS=Homo sapiens GN=M6PR PE=1 SV=1 - [MPRD_HUMAN]	M6PR	1.14311	1.25409	1.14893	4	5	5
P20674	Cytochrome c oxidase subunit 5A, mitochondrial OS=Homo sapiens GN=COX5A PE=1 SV=2 - [COX5A_HUMAN]	COX5A	0.934278	0.991119	1.00448	9	11	8
P20700	Lamin-B1 OS=Homo sapiens GN=LMNB1 PE=1 SV=2 - [LMNB1_HUMAN]	LMNB1	1.22184	1.19226	1.21029	21	23	25
P20711-4	Isoform 4 of Aromatic-L-amino-acid decarboxylase OS=Homo sapiens GN=DDC - [DDC_HUMAN]	DDC	0.642114	0.736486	0.701601	2	1	2
P20810-4	Isoform 4 of Calpastatin OS=Homo sapiens GN=CAST - [ICAL_HUMAN]	CAST	1.05391	1.0513	1.07272	18	19	22
P20823-8	Isoform 8 of Hepatocyte nuclear factor 1-alpha OS=Homo sapiens GN=HNF1A - [HNF1A_HUMAN]	HNF1A		1.5921	1.2672		1	1
P20839	Inosine-5'-monophosphate dehydrogenase 1 OS=Homo sapiens GN=IMPDH1 PE=1 SV=2 - [IMDH1_HUMAN]	IMPDH1	0.931554	0.929661	1.03936	10	10	9
P20933	N(4)-(beta-N-acetylglucosaminyl)-L-asparaginase OS=Homo sapiens GN=AGA PE=1 SV=2 - [ASPG_HUMAN]	AGA	0.594591	0.575361	0.693408	1	1	1
P20962	Parathymosin OS=Homo sapiens GN=PTMS PE=1 SV=2 - [PTMS_HUMAN]	PTMS	1.4733			1
P21127-12	Isoform 7 of Cyclin-dependent kinase 11B OS=Homo sapiens GN=CDK11B - [CD11B_HUMAN]	CDK11B		1.45046	0.956107		3	4
P21266	Glutathione S-transferase Mu 3 OS=Homo sapiens GN=GSTM3 PE=1 SV=3 - [GSTM3_HUMAN]	GSTM3	1.02055	1.0143	1.05613	12	15	16
P21281	V-type proton ATPase subunit B, brain isoform OS=Homo sapiens GN=ATP6V1B2 PE=1 SV=3 - [VATB2_HUMAN]	ATP6V1B2	1.04783	0.844268	0.936756	3	3	6
P21283	V-type proton ATPase subunit C 1 OS=Homo sapiens GN=ATP6V1C1 PE=1 SV=4 - [VATC1_HUMAN]	ATP6V1C1	1.03629	1.20432	1.18612	5	8	8
P21291	Cysteine and glycine-rich protein 1 OS=Homo sapiens GN=CSRP1 PE=1 SV=3 - [CSRP1_HUMAN]	CSRP1	0.964442	1.03893	0.989083	11	11	12
P21333-2	Isoform 2 of Filamin-A OS=Homo sapiens GN=FLNA - [FLNA_HUMAN]	FLNA	1.10097	1.09994	1.10095	207	202	207
P21397	Amine oxidase [flavin-containing] A OS=Homo sapiens GN=MAOA PE=1 SV=1 - [AOFA_HUMAN]	MAOA	0.777211	0.643916	0.732832	12	8	9
P21399	Cytoplasmic aconitate hydratase OS=Homo sapiens GN=ACO1 PE=1 SV=3 - [ACOC_HUMAN]	ACO1	0.902936	0.987825	0.909658	21	18	19
P21549	Serine--pyruvate aminotransferase OS=Homo sapiens GN=AGXT PE=1 SV=1 - [SPYA_HUMAN]	AGXT
P21589-2	Isoform 2 of 5'-nucleotidase OS=Homo sapiens GN=NT5E - [5NTD_HUMAN]	NT5E	1.02258	0.510681	0.960124	1	1	2
P21675-8	Isoform 2e of Transcription initiation factor TFIID subunit 1 OS=Homo sapiens GN=TAF1 - [TAF1_HUMAN]	TAF1			1.28451			2
P21796	Voltage-dependent anion-selective channel protein 1 OS=Homo sapiens GN=VDAC1 PE=1 SV=2 - [VDAC1_HUMAN]	VDAC1	1.30906	1.28767	1.32772	41	34	36
P21912	Succinate dehydrogenase [ubiquinone] iron-sulfur subunit, mitochondrial OS=Homo sapiens GN=SDHB PE=1 SV=3 - [SDHB_HUMAN]	SDHB	0.969516	0.986724	1.0424	4	7	5
P21926	CD9 antigen OS=Homo sapiens GN=CD9 PE=1 SV=4 - [CD9_HUMAN]	CD9	1.34359	1.31215	1.32459	6	6	7
P21964-2	Isoform Soluble of Catechol O-methyltransferase OS=Homo sapiens GN=COMT - [COMT_HUMAN]	COMT	1.09589	1.02858	1.0937	16	13	15
P21980	Protein-glutamine gamma-glutamyltransferase 2 OS=Homo sapiens GN=TGM2 PE=1 SV=2 - [TGM2_HUMAN]	TGM2	0.505165	0.51116	0.451469	12	13	14
P22059	Oxysterol-binding protein 1 OS=Homo sapiens GN=OSBP PE=1 SV=1 - [OSBP1_HUMAN]	OSBP	0.890048	0.874653	0.777764	12	9	12
P22061	Protein-L-isoaspartate(D-aspartate) O-methyltransferase OS=Homo sapiens GN=PCMT1 PE=1 SV=4 - [PIMT_HUMAN]	PCMT1	1.04413	1.07345	1.18667	7	10	11
P22087	rRNA 2'-O-methyltransferase fibrillarin OS=Homo sapiens GN=FBL PE=1 SV=2 - [FBRL_HUMAN]	FBL	1.0535	1.03663	1.04306	28	31	30
P22102	Trifunctional purine biosynthetic protein adenosine-3 OS=Homo sapiens GN=GART PE=1 SV=1 - [PUR2_HUMAN]	GART	0.9151	0.939828	0.93681	20	21	26
P22234	Multifunctional protein ADE2 OS=Homo sapiens GN=PAICS PE=1 SV=3 - [PUR6_HUMAN]	PAICS	0.776672	0.811379	0.821026	21	18	22
P22307-6	Isoform 6 of Non-specific lipid-transfer protein OS=Homo sapiens GN=SCP2 - [NLTP_HUMAN]	SCP2	1.13812	1.21495	1.16399	13	15	12
P22309-2	Isoform 2 of UDP-glucuronosyltransferase 1-1 OS=Homo sapiens GN=UGT1A1 - [UD11_HUMAN]	UGT1A1	1.3358	1.04108	1.26392	2	2	2
P22314-2	Isoform 2 of Ubiquitin-like modifier-activating enzyme 1 OS=Homo sapiens GN=UBA1 - [UBA1_HUMAN]	UBA1	0.951737	0.934086	0.964144	72	69	70
P22392-2	Isoform 3 of Nucleoside diphosphate kinase B OS=Homo sapiens GN=NME2 - [NDKB_HUMAN]	NME2	0.860829	0.83545	0.868389	28	28	28
P22570-5	Isoform 5 of NADPH:adrenodoxin oxidoreductase, mitochondrial OS=Homo sapiens GN=FDXR - [ADRO_HUMAN]	FDXR			1.04563			3
P22626	Heterogeneous nuclear ribonucleoproteins A2/B1 OS=Homo sapiens GN=HNRNPA2B1 PE=1 SV=2 - [ROA2_HUMAN]	HNRNPA2B1	1.09231	1.1077	1.10471	70	64	77
P22676	Calretinin OS=Homo sapiens GN=CALB2 PE=2 SV=2 - [CALB2_HUMAN]	CALB2	1.3349	1.26609	1.39312	9	8	8
P22692-2	Isoform 2 of Insulin-like growth factor-binding protein 4 OS=Homo sapiens GN=IGFBP4 - [IBP4_HUMAN]	IGFBP4	1.06249	0.905968	0.890025	1	1	1
P22694-10	Isoform 10 of cAMP-dependent protein kinase catalytic subunit beta OS=Homo sapiens GN=PRKACB - [KAPCB_HUMAN]	PRKACB		0.941391	0.974468		1	1
P22695	Cytochrome b-c1 complex subunit 2, mitochondrial OS=Homo sapiens GN=UQCRC2 PE=1 SV=3 - [QCR2_HUMAN]	UQCRC2	1.12491	1.10914	1.11631	20	22	24
P22830	Ferrochelatase, mitochondrial OS=Homo sapiens GN=FECH PE=1 SV=2 - [HEMH_HUMAN]	FECH	0.62928	0.823078	0.494516	6	3	5
P23141	Liver carboxylesterase 1 OS=Homo sapiens GN=CES1 PE=1 SV=2 - [EST1_HUMAN]	CES1	1.27002	1.28764	1.275	96	101	98
P23193	Transcription elongation factor A protein 1 OS=Homo sapiens GN=TCEA1 PE=1 SV=2 - [TCEA1_HUMAN]	TCEA1	0.977859	0.961028	0.951646	11	10	12
P23229-4	Isoform Alpha-6X2A of Integrin alpha-6 OS=Homo sapiens GN=ITGA6 - [ITA6_HUMAN]	ITGA6	0.732179	0.767977	0.77784	6	9	10
P23246	Splicing factor, proline- and glutamine-rich OS=Homo sapiens GN=SFPQ PE=1 SV=2 - [SFPQ_HUMAN]	SFPQ	1.06066	1.1084	1.03442	35	33	33
P23258	Tubulin gamma-1 chain OS=Homo sapiens GN=TUBG1 PE=1 SV=2 - [TBG1_HUMAN]	TUBG1	1.07026	0.943234	0.739477	2	5	4
P23284	Peptidyl-prolyl cis-trans isomerase B OS=Homo sapiens GN=PPIB PE=1 SV=2 - [PPIB_HUMAN]	PPIB	1.01605	1.03507	1.03317	35	30	36
P23368	NAD-dependent malic enzyme, mitochondrial OS=Homo sapiens GN=ME2 PE=1 SV=1 - [MAOM_HUMAN]	ME2	1.06651	1.03238	1.1319	8	11	11
P23381	Tryptophan--tRNA ligase, cytoplasmic OS=Homo sapiens GN=WARS PE=1 SV=2 - [SYWC_HUMAN]	WARS	0.928098	0.887634	0.864721	15	15	12
P23396	40S ribosomal protein S3 OS=Homo sapiens GN=RPS3 PE=1 SV=2 - [RS3_HUMAN]	RPS3	1.03273	1.02963	1.01457	46	40	39
P23434	Glycine cleavage system H protein, mitochondrial OS=Homo sapiens GN=GCSH PE=1 SV=2 - [GCSH_HUMAN]	GCSH	1.17033	0.902228	0.884561	2	2	2
P23458	Tyrosine-protein kinase JAK1 OS=Homo sapiens GN=JAK1 PE=1 SV=2 - [JAK1_HUMAN]	JAK1	0.996167	0.994579	0.999148	2	3	3
P23526	Adenosylhomocysteinase OS=Homo sapiens GN=AHCY PE=1 SV=4 - [SAHH_HUMAN]	AHCY	0.901692	0.887947	0.930544	36	35	33
P23528	Cofilin-1 OS=Homo sapiens GN=CFL1 PE=1 SV=3 - [COF1_HUMAN]	CFL1	1.03977	1.12999	1.1062	33	32	33
P23588	Eukaryotic translation initiation factor 4B OS=Homo sapiens GN=EIF4B PE=1 SV=2 - [IF4B_HUMAN]	EIF4B	0.84609	0.939639	0.934791	15	19	16
P23634-5	Isoform ZK of Plasma membrane calcium-transporting ATPase 4 OS=Homo sapiens GN=ATP2B4 - [AT2B4_HUMAN]	ATP2B4	1.28785			2
P23677	Inositol-trisphosphate 3-kinase A OS=Homo sapiens GN=ITPKA PE=1 SV=1 - [IP3KA_HUMAN]	ITPKA	0.762158	0.85423	0.709343	6	7	5
P23786	Carnitine O-palmitoyltransferase 2, mitochondrial OS=Homo sapiens GN=CPT2 PE=1 SV=2 - [CPT2_HUMAN]	CPT2	0.534632	0.975554	0.90551	2	4	3
P23919-2	Isoform 2 of Thymidylate kinase OS=Homo sapiens GN=DTYMK - [KTHY_HUMAN]	DTYMK	1.22489	1.11264	1.32073	7	7	7
P23921	Ribonucleoside-diphosphate reductase large subunit OS=Homo sapiens GN=RRM1 PE=1 SV=1 - [RIR1_HUMAN]	RRM1	0.938457	0.92859	0.682698	7	5	5
P24347	Stromelysin-3 OS=Homo sapiens GN=MMP11 PE=1 SV=3 - [MMP11_HUMAN]	MMP11
P24386	Rab proteins geranylgeranyltransferase component A 1 OS=Homo sapiens GN=CHM PE=1 SV=3 - [RAE1_HUMAN]	CHM	0.779195	0.725217	0.773957	1	3	1
P24534	Elongation factor 1-beta OS=Homo sapiens GN=EEF1B2 PE=1 SV=3 - [EF1B_HUMAN]	EEF1B2	1.03604	0.97215	0.96551	16	14	13
P24539	ATP synthase F(0) complex subunit B1, mitochondrial OS=Homo sapiens GN=ATP5F1 PE=1 SV=2 - [AT5F1_HUMAN]	ATP5F1	0.977343	0.893771	1.09652	8	6	8
P24557-4	Isoform 4 of Thromboxane-A synthase OS=Homo sapiens GN=TBXAS1 - [THAS_HUMAN]	TBXAS1	1.0181	0.707547	0.894304	1	1	1
P24666	Low molecular weight phosphotyrosine protein phosphatase OS=Homo sapiens GN=ACP1 PE=1 SV=3 - [PPAC_HUMAN]	ACP1	1.15042	1.01597	0.853399	9	8	6
P24752	Acetyl-CoA acetyltransferase, mitochondrial OS=Homo sapiens GN=ACAT1 PE=1 SV=1 - [THIL_HUMAN]	ACAT1	1.0826	1.12857	1.11918	20	22	23
P24928	DNA-directed RNA polymerase II subunit RPB1 OS=Homo sapiens GN=POLR2A PE=1 SV=2 - [RPB1_HUMAN]	POLR2A	0.97305	0.901646	0.878175	8	10	8
P24941-2	Isoform 2 of Cyclin-dependent kinase 2 OS=Homo sapiens GN=CDK2 - [CDK2_HUMAN]	CDK2	1.45896	0.988259	0.526531	1	4	2
P25205	DNA replication licensing factor MCM3 OS=Homo sapiens GN=MCM3 PE=1 SV=3 - [MCM3_HUMAN]	MCM3	1.2214	1.21254	1.18885	26	28	25
P25208	Nuclear transcription factor Y subunit beta OS=Homo sapiens GN=NFYB PE=1 SV=2 - [NFYB_HUMAN]	NFYB	1.11654	1.09155	0.524887	1	2	1
P25325	3-mercaptopyruvate sulfurtransferase OS=Homo sapiens GN=MPST PE=1 SV=3 - [THTM_HUMAN]	MPST	1.25404	1.28877	1.26799	10	9	11
P25398	40S ribosomal protein S12 OS=Homo sapiens GN=RPS12 PE=1 SV=3 - [RS12_HUMAN]	RPS12	1.04406	1.02964	1.06025	29	38	32
P25440-4	Isoform 4 of Bromodomain-containing protein 2 OS=Homo sapiens GN=BRD2 - [BRD2_HUMAN]	BRD2			1.01337			1
P25490	Transcriptional repressor protein YY1 OS=Homo sapiens GN=YY1 PE=1 SV=2 - [TYY1_HUMAN]	YY1	1.48308	1.06926	1.02923	2	2	2
P25685	DnaJ homolog subfamily B member 1 OS=Homo sapiens GN=DNAJB1 PE=1 SV=4 - [DNJB1_HUMAN]	DNAJB1	0.883473	0.951244	0.89021	9	10	11
P25705	ATP synthase subunit alpha, mitochondrial OS=Homo sapiens GN=ATP5A1 PE=1 SV=1 - [ATPA_HUMAN]	ATP5A1	1.12192	1.09944	1.09965	44	44	51
P25774-2	Isoform 2 of Cathepsin S OS=Homo sapiens GN=CTSS - [CATS_HUMAN]	CTSS	0.819158	0.811448	0.83046	2	1	1
P25786	Proteasome subunit alpha type-1 OS=Homo sapiens GN=PSMA1 PE=1 SV=1 - [PSA1_HUMAN]	PSMA1	0.932064	0.966205	0.937427	18	15	15
P25787	Proteasome subunit alpha type-2 OS=Homo sapiens GN=PSMA2 PE=1 SV=2 - [PSA2_HUMAN]	PSMA2	1.03981	0.96268	0.938222	9	7	7
P25788-2	Isoform 2 of Proteasome subunit alpha type-3 OS=Homo sapiens GN=PSMA3 - [PSA3_HUMAN]	PSMA3	0.995164	1.00174	0.970987	8	11	10
P25789	Proteasome subunit alpha type-4 OS=Homo sapiens GN=PSMA4 PE=1 SV=1 - [PSA4_HUMAN]	PSMA4	1.01618	1.02828	1.00043	19	17	18
P25815	Protein S100-P OS=Homo sapiens GN=S100P PE=1 SV=2 - [S100P_HUMAN]	S100P	1.01559	1.00863	1.00708	27	25	27
P26006	Integrin alpha-3 OS=Homo sapiens GN=ITGA3 PE=1 SV=5 - [ITA3_HUMAN]	ITGA3	0.946888	0.993314	0.832209	7	6	8
P26038	Moesin OS=Homo sapiens GN=MSN PE=1 SV=3 - [MOES_HUMAN]	MSN	0.936431	0.959364	0.941931	52	48	48
P26196	Probable ATP-dependent RNA helicase DDX6 OS=Homo sapiens GN=DDX6 PE=1 SV=2 - [DDX6_HUMAN]	DDX6	0.893585	1.12932	0.88097	13	13	14
P26358	DNA (cytosine-5)-methyltransferase 1 OS=Homo sapiens GN=DNMT1 PE=1 SV=2 - [DNMT1_HUMAN]	DNMT1	0.624339	0.578202	0.781026	8	6	9
P26368-2	Isoform 2 of Splicing factor U2AF 65 kDa subunit OS=Homo sapiens GN=U2AF2 - [U2AF2_HUMAN]	U2AF2	1.17636	1.08781	1.18458	15	17	13
P26373	60S ribosomal protein L13 OS=Homo sapiens GN=RPL13 PE=1 SV=4 - [RL13_HUMAN]	RPL13	0.974017	1.03696	1.01671	22	19	19
P26440-2	Isoform 2 of Isovaleryl-CoA dehydrogenase, mitochondrial OS=Homo sapiens GN=IVD - [IVD_HUMAN]	IVD		0.872403	1.0513		6	4
P26447	Protein S100-A4 OS=Homo sapiens GN=S100A4 PE=1 SV=1 - [S10A4_HUMAN]	S100A4	0.878063	0.834664	0.833146	28	21	25
P26572	Alpha-1,3-mannosyl-glycoprotein 2-beta-N-acetylglucosaminyltransferase OS=Homo sapiens GN=MGAT1 PE=1 SV=2 - [MGAT1_HUMAN]	MGAT1
P26583	High mobility group protein B2 OS=Homo sapiens GN=HMGB2 PE=1 SV=2 - [HMGB2_HUMAN]	HMGB2	1.25845	1.23054	1.24176	11	13	13
P26599	Polypyrimidine tract-binding protein 1 OS=Homo sapiens GN=PTBP1 PE=1 SV=1 - [PTBP1_HUMAN]	PTBP1	1.11153	1.12751	1.12349	30	31	31
P26639	Threonine--tRNA ligase, cytoplasmic OS=Homo sapiens GN=TARS PE=1 SV=3 - [SYTC_HUMAN]	TARS	0.84303	0.814379	0.786735	23	22	20
P26640	Valine--tRNA ligase OS=Homo sapiens GN=VARS PE=1 SV=4 - [SYVC_HUMAN]	VARS	1.06033	1.01669	1.08434	33	29	33
P26641	Elongation factor 1-gamma OS=Homo sapiens GN=EEF1G PE=1 SV=3 - [EF1G_HUMAN]	EEF1G	0.856836	0.846348	0.870968	44	40	42
P26885	Peptidyl-prolyl cis-trans isomerase FKBP2 OS=Homo sapiens GN=FKBP2 PE=1 SV=2 - [FKBP2_HUMAN]	FKBP2	0.887408	0.809219	0.622353	4	3	3
P27105	Erythrocyte band 7 integral membrane protein OS=Homo sapiens GN=STOM PE=1 SV=3 - [STOM_HUMAN]	STOM		0.995623	0.977231		2	2
P27144	Adenylate kinase 4, mitochondrial OS=Homo sapiens GN=AK4 PE=1 SV=1 - [KAD4_HUMAN]	AK4	0.722438	0.554398	0.689077	3	3	5
P27338	Amine oxidase [flavin-containing] B OS=Homo sapiens GN=MAOB PE=1 SV=3 - [AOFB_HUMAN]	MAOB	0.751543	0.776246	0.684686	8	9	10
P27348	14-3-3 protein theta OS=Homo sapiens GN=YWHAQ PE=1 SV=1 - [1433T_HUMAN]	YWHAQ	1.04092	1.03001	1.02128	26	21	23
P27361	Mitogen-activated protein kinase 3 OS=Homo sapiens GN=MAPK3 PE=1 SV=4 - [MK03_HUMAN]	MAPK3			1.54811			1
P27448-8	Isoform 7 of MAP/microtubule affinity-regulating kinase 3 OS=Homo sapiens GN=MARK3 - [MARK3_HUMAN]	MARK3	0.827098	0.340901	0.840213	1	1	1
P27487	Dipeptidyl peptidase 4 OS=Homo sapiens GN=DPP4 PE=1 SV=2 - [DPP4_HUMAN]	DPP4	1.59488	1.66729	1.45737	7	13	12
P27540-2	Isoform 2 of Aryl hydrocarbon receptor nuclear translocator OS=Homo sapiens GN=ARNT - [ARNT_HUMAN]	ARNT
P27635	60S ribosomal protein L10 OS=Homo sapiens GN=RPL10 PE=1 SV=4 - [RL10_HUMAN]	RPL10	1.03706	0.999322	1.02124	19	27	26
P27694	Replication protein A 70 kDa DNA-binding subunit OS=Homo sapiens GN=RPA1 PE=1 SV=2 - [RFA1_HUMAN]	RPA1	0.988783	0.967783	1.00851	12	10	14
P27695	DNA-(apurinic or apyrimidinic site) lyase OS=Homo sapiens GN=APEX1 PE=1 SV=2 - [APEX1_HUMAN]	APEX1	1.22016	1.18805	1.22692	14	14	10
P27707	Deoxycytidine kinase OS=Homo sapiens GN=DCK PE=1 SV=1 - [DCK_HUMAN]	DCK	0.904522	1.35687	0.689916	2	4	1
P27708	CAD protein OS=Homo sapiens GN=CAD PE=1 SV=3 - [PYR1_HUMAN]	CAD	0.793909	0.810791	0.790967	35	35	35
P27797	Calreticulin OS=Homo sapiens GN=CALR PE=1 SV=1 - [CALR_HUMAN]	CALR	0.98761	0.980709	0.986599	47	39	40
P27816	Microtubule-associated protein 4 OS=Homo sapiens GN=MAP4 PE=1 SV=3 - [MAP4_HUMAN]	MAP4			1.02927			23
P27816-4	Isoform 4 of Microtubule-associated protein 4 OS=Homo sapiens GN=MAP4 - [MAP4_HUMAN]	MAP4	0.617957		0.888718	1		2
P27824	Calnexin OS=Homo sapiens GN=CANX PE=1 SV=2 - [CALX_HUMAN]	CANX	1.06074	1.0987	1.05262	37	39	36
P27986-5	Isoform 5 of Phosphatidylinositol 3-kinase regulatory subunit alpha OS=Homo sapiens GN=PIK3R1 - [P85A_HUMAN]	PIK3R1			0.482397			1
P28062-2	Isoform 2 of Proteasome subunit beta type-8 OS=Homo sapiens GN=PSMB8 - [PSB8_HUMAN]	PSMB8	0.791468	1.01298	1.17324	3	4	3
P28066	Proteasome subunit alpha type-5 OS=Homo sapiens GN=PSMA5 PE=1 SV=3 - [PSA5_HUMAN]	PSMA5	0.995612	0.969491	0.945139	12	15	11
P28070	Proteasome subunit beta type-4 OS=Homo sapiens GN=PSMB4 PE=1 SV=4 - [PSB4_HUMAN]	PSMB4	0.900189	0.986558	1.13235	8	8	7
P28072	Proteasome subunit beta type-6 OS=Homo sapiens GN=PSMB6 PE=1 SV=4 - [PSB6_HUMAN]	PSMB6	0.981327	0.807053	0.87139	3	4	3
P28074	Proteasome subunit beta type-5 OS=Homo sapiens GN=PSMB5 PE=1 SV=3 - [PSB5_HUMAN]	PSMB5	0.978757	0.981516	0.941097	6	10	9
P28288	ATP-binding cassette sub-family D member 3 OS=Homo sapiens GN=ABCD3 PE=1 SV=1 - [ABCD3_HUMAN]	ABCD3	0.926524	1.00539	0.850996	17	15	17
P28290-2	Isoform 2 of Sperm-specific antigen 2 OS=Homo sapiens GN=SSFA2 - [SSFA2_HUMAN]	SSFA2	0.944738	1.20466	1.15774	2	1	1
P28331	NADH-ubiquinone oxidoreductase 75 kDa subunit, mitochondrial OS=Homo sapiens GN=NDUFS1 PE=1 SV=3 - [NDUS1_HUMAN]	NDUFS1	0.947879	0.865577	0.855704	18	12	13
P28340	DNA polymerase delta catalytic subunit OS=Homo sapiens GN=POLD1 PE=1 SV=2 - [DPOD1_HUMAN]	POLD1	1.01425		1.09542	2		4
P28370-2	Isoform 2 of Probable global transcription activator SNF2L1 OS=Homo sapiens GN=SMARCA1 - [SMCA1_HUMAN]	SMARCA1	1.22339	1.19805		1	1
P28482	Mitogen-activated protein kinase 1 OS=Homo sapiens GN=MAPK1 PE=1 SV=3 - [MK01_HUMAN]	MAPK1	1.14531	1.11955	1.07195	9	8	8
P28676	Grancalcin OS=Homo sapiens GN=GCA PE=1 SV=2 - [GRAN_HUMAN]	GCA	1.4364	0.931917		1	1
P28799	Granulins OS=Homo sapiens GN=GRN PE=1 SV=2 - [GRN_HUMAN]	GRN	1.8525	1.88677	1.87346	19	16	19
P28838-2	Isoform 2 of Cytosol aminopeptidase OS=Homo sapiens GN=LAP3 - [AMPL_HUMAN]	LAP3	1.00001	1.00127	1.02639	19	17	16
P29083	General transcription factor IIE subunit 1 OS=Homo sapiens GN=GTF2E1 PE=1 SV=2 - [T2EA_HUMAN]	GTF2E1	0.823179	1.07497	0.788062	1	1	1
P29084	Transcription initiation factor IIE subunit beta OS=Homo sapiens GN=GTF2E2 PE=1 SV=1 - [T2EB_HUMAN]	GTF2E2	0.870186	0.969617	0.812105	3	3	2
P29144	Tripeptidyl-peptidase 2 OS=Homo sapiens GN=TPP2 PE=1 SV=4 - [TPP2_HUMAN]	TPP2		0.621043	0.965144		1	2
P29218	Inositol monophosphatase 1 OS=Homo sapiens GN=IMPA1 PE=1 SV=1 - [IMPA1_HUMAN]	IMPA1	1.07346	1.29235	1.21461	7	7	8
P29317	Ephrin type-A receptor 2 OS=Homo sapiens GN=EPHA2 PE=1 SV=2 - [EPHA2_HUMAN]	EPHA2		0.905033			1
P29350-2	Isoform 3 of Tyrosine-protein phosphatase non-receptor type 6 OS=Homo sapiens GN=PTPN6 - [PTN6_HUMAN]	PTPN6	0.665925	0.995912	0.694877	3	3	2
P29353-5	Isoform 5 of SHC-transforming protein 1 OS=Homo sapiens GN=SHC1 - [SHC1_HUMAN]	SHC1			0.90341			3
P29372-5	Isoform 4 of DNA-3-methyladenine glycosylase OS=Homo sapiens GN=MPG - [3MG_HUMAN]	MPG			1.11223			2
P29373	Cellular retinoic acid-binding protein 2 OS=Homo sapiens GN=CRABP2 PE=1 SV=2 - [RABP2_HUMAN]	CRABP2	0.610498	0.617887	0.614218	5	4	4
P29401	Transketolase OS=Homo sapiens GN=TKT PE=1 SV=3 - [TKT_HUMAN]	TKT	1.15162	1.18152	1.1638	129	115	131
P29558-2	Isoform 2 of RNA-binding motif, single-stranded-interacting protein 1 OS=Homo sapiens GN=RBMS1 - [RBMS1_HUMAN]	RBMS1	0.916865	1.0577		1	3
P29590-2	Isoform PML-5 of Protein PML OS=Homo sapiens GN=PML - [PML_HUMAN]	PML	1.06885	1.40281	0.991148	8	1	7
P29692	Elongation factor 1-delta OS=Homo sapiens GN=EEF1D PE=1 SV=5 - [EF1D_HUMAN]	EEF1D	1.00264	0.94534	0.999097	4	5	5
P29692-3	Isoform 3 of Elongation factor 1-delta OS=Homo sapiens GN=EEF1D - [EF1D_HUMAN]	EEF1D	1.22521	1.21126	1.25886	3	3	3
P29966	Myristoylated alanine-rich C-kinase substrate OS=Homo sapiens GN=MARCKS PE=1 SV=4 - [MARCS_HUMAN]	MARCKS	0.962467	0.99243	1.01983	6	7	8
P29992	Guanine nucleotide-binding protein subunit alpha-11 OS=Homo sapiens GN=GNA11 PE=1 SV=2 - [GNA11_HUMAN]	GNA11	0.917822	0.784664	0.829932	2	4	3
P30038-2	Isoform 2 of Delta-1-pyrroline-5-carboxylate dehydrogenase, mitochondrial OS=Homo sapiens GN=ALDH4A1 - [AL4A1_HUMAN]	ALDH4A1	0.766319	0.508173	0.592509	1	1	2
P30040	Endoplasmic reticulum resident protein 29 OS=Homo sapiens GN=ERP29 PE=1 SV=4 - [ERP29_HUMAN]	ERP29	1.27362	1.22946	1.27184	15	12	12
P30041	Peroxiredoxin-6 OS=Homo sapiens GN=PRDX6 PE=1 SV=3 - [PRDX6_HUMAN]	PRDX6	0.663623	0.662758	0.657388	38	44	42
P30042-2	Isoform Short of ES1 protein homolog, mitochondrial OS=Homo sapiens GN=C21orf33 - [ES1_HUMAN]	C21orf33	0.967823	1.24244	1.06808	4	4	5
P30043	Flavin reductase (NADPH) OS=Homo sapiens GN=BLVRB PE=1 SV=3 - [BLVRB_HUMAN]	BLVRB	1.22796	1.25224	1.2184	19	18	17
P30044-2	Isoform Cytoplasmic+peroxisomal of Peroxiredoxin-5, mitochondrial OS=Homo sapiens GN=PRDX5 - [PRDX5_HUMAN]	PRDX5	0.949024	1.00101	1.02002	22	20	18
P30046	D-dopachrome decarboxylase OS=Homo sapiens GN=DDT PE=1 SV=3 - [DOPD_HUMAN]	DDT	0.871068	0.792563	0.847542	17	15	15
P30047-2	Isoform 2 of GTP cyclohydrolase 1 feedback regulatory protein OS=Homo sapiens GN=GCHFR - [GFRP_HUMAN]	GCHFR	1.08859	0.978444	1.05348	1	1	1
P30048-2	Isoform 2 of Thioredoxin-dependent peroxide reductase, mitochondrial OS=Homo sapiens GN=PRDX3 - [PRDX3_HUMAN]	PRDX3	1.10508	1.0881	1.10688	10	17	15
P30049	ATP synthase subunit delta, mitochondrial OS=Homo sapiens GN=ATP5D PE=1 SV=2 - [ATPD_HUMAN]	ATP5D	1.25345	1.23361	1.11006	4	3	2
P30050	60S ribosomal protein L12 OS=Homo sapiens GN=RPL12 PE=1 SV=1 - [RL12_HUMAN]	RPL12	1.06206	1.0858	1.00437	13	15	17
P30084	Enoyl-CoA hydratase, mitochondrial OS=Homo sapiens GN=ECHS1 PE=1 SV=4 - [ECHM_HUMAN]	ECHS1	1.29603	1.29576	1.29297	24	25	25
P30085	UMP-CMP kinase OS=Homo sapiens GN=CMPK1 PE=1 SV=3 - [KCY_HUMAN]	CMPK1	0.907703	0.945771	0.896812	11	11	12
P30086	Phosphatidylethanolamine-binding protein 1 OS=Homo sapiens GN=PEBP1 PE=1 SV=3 - [PEBP1_HUMAN]	PEBP1	1.113	1.08045	1.08548	25	24	28
P30101	Protein disulfide-isomerase A3 OS=Homo sapiens GN=PDIA3 PE=1 SV=4 - [PDIA3_HUMAN]	PDIA3	0.920043	0.915585	0.93021	59	54	61
P30153	Serine/threonine-protein phosphatase 2A 65 kDa regulatory subunit A alpha isoform OS=Homo sapiens GN=PPP2R1A PE=1 SV=4 - [2AAA_HUMAN]	PPP2R1A	0.999889	0.976416	1.01921	37	30	39
P30154-5	Isoform 5 of Serine/threonine-protein phosphatase 2A 65 kDa regulatory subunit A beta isoform OS=Homo sapiens GN=PPP2R1B - [2AAB_HUMAN]	PPP2R1B	0.53389	0.591141	0.651967	1	1	1
P30260	Cell division cycle protein 27 homolog OS=Homo sapiens GN=CDC27 PE=1 SV=2 - [CDC27_HUMAN]	CDC27
P30405	Peptidyl-prolyl cis-trans isomerase F, mitochondrial OS=Homo sapiens GN=PPIF PE=1 SV=1 - [PPIF_HUMAN]	PPIF	0.533912	1.21773	0.832143	1	1	3
P30419-2	Isoform Short of Glycylpeptide N-tetradecanoyltransferase 1 OS=Homo sapiens GN=NMT1 - [NMT1_HUMAN]	NMT1	0.848755	1.0363	0.977716	9	9	10
P30519-2	Isoform 2 of Heme oxygenase 2 OS=Homo sapiens GN=HMOX2 - [HMOX2_HUMAN]	HMOX2	0.890284	0.999008	0.866214	3	5	3
P30520	Adenylosuccinate synthetase isozyme 2 OS=Homo sapiens GN=ADSS PE=1 SV=3 - [PURA2_HUMAN]	ADSS	1.07577	1.08959	1.01605	14	13	12
P30533	Alpha-2-macroglobulin receptor-associated protein OS=Homo sapiens GN=LRPAP1 PE=1 SV=1 - [AMRP_HUMAN]	LRPAP1	1.00011	0.772823	1.26278	4	7	1
P30566	Adenylosuccinate lyase OS=Homo sapiens GN=ADSL PE=1 SV=2 - [PUR8_HUMAN]	ADSL	0.651366		0.648	4		3
P30622-2	Isoform 3 of CAP-Gly domain-containing linker protein 1 OS=Homo sapiens GN=CLIP1 - [CLIP1_HUMAN]	CLIP1	1.11856	1.18135	1.21435	26	27	30
P30626-3	Isoform 3 of Sorcin OS=Homo sapiens GN=SRI - [SORCN_HUMAN]	SRI	1.02684	1.02038	1.00089	6	6	7
P30740	Leukocyte elastase inhibitor OS=Homo sapiens GN=SERPINB1 PE=1 SV=1 - [ILEU_HUMAN]	SERPINB1	0.577309	0.596757	0.569706	22	21	21
P30837	Aldehyde dehydrogenase X, mitochondrial OS=Homo sapiens GN=ALDH1B1 PE=1 SV=3 - [AL1B1_HUMAN]	ALDH1B1	1.17897	1.16606	1.24147	13	10	11
P30838	Aldehyde dehydrogenase, dimeric NADP-preferring OS=Homo sapiens GN=ALDH3A1 PE=1 SV=3 - [AL3A1_HUMAN]	ALDH3A1	0.554905	0.556937	0.567001	44	40	47
P30876	DNA-directed RNA polymerase II subunit RPB2 OS=Homo sapiens GN=POLR2B PE=1 SV=1 - [RPB2_HUMAN]	POLR2B	1.08087	0.945445	0.994667	6	6	7
P31040	Succinate dehydrogenase [ubiquinone] flavoprotein subunit, mitochondrial OS=Homo sapiens GN=SDHA PE=1 SV=2 - [SDHA_HUMAN]	SDHA	1.05938	1.08882	1.0641	25	17	25
P31150	Rab GDP dissociation inhibitor alpha OS=Homo sapiens GN=GDI1 PE=1 SV=2 - [GDIA_HUMAN]	GDI1	0.831463	0.868232	0.876655	18	18	17
P31153	S-adenosylmethionine synthase isoform type-2 OS=Homo sapiens GN=MAT2A PE=1 SV=1 - [METK2_HUMAN]	MAT2A	1.04562	1.04335	0.925796	10	11	11
P31350	Ribonucleoside-diphosphate reductase subunit M2 OS=Homo sapiens GN=RRM2 PE=1 SV=1 - [RIR2_HUMAN]	RRM2	0.692231	0.603484	0.728041	4	6	2
P31641	Sodium- and chloride-dependent taurine transporter OS=Homo sapiens GN=SLC6A6 PE=1 SV=2 - [SC6A6_HUMAN]	SLC6A6
P31689	DnaJ homolog subfamily A member 1 OS=Homo sapiens GN=DNAJA1 PE=1 SV=2 - [DNJA1_HUMAN]	DNAJA1	1.01665	0.969901	0.960734	25	23	18
P31751	RAC-beta serine/threonine-protein kinase OS=Homo sapiens GN=AKT2 PE=1 SV=2 - [AKT2_HUMAN]	AKT2	0.917692	0.866228	0.726269	2	1	2
P31930	Cytochrome b-c1 complex subunit 1, mitochondrial OS=Homo sapiens GN=UQCRC1 PE=1 SV=3 - [QCR1_HUMAN]	UQCRC1	1.15422	1.18287	1.14527	20	24	20
P31937	3-hydroxyisobutyrate dehydrogenase, mitochondrial OS=Homo sapiens GN=HIBADH PE=1 SV=2 - [3HIDH_HUMAN]	HIBADH	0.889451	1.11245	1.05402	15	10	12
P31939	Bifunctional purine biosynthesis protein PURH OS=Homo sapiens GN=ATIC PE=1 SV=3 - [PUR9_HUMAN]	ATIC	0.763254	0.770575	0.784379	41	40	45
P31942	Heterogeneous nuclear ribonucleoprotein H3 OS=Homo sapiens GN=HNRNPH3 PE=1 SV=2 - [HNRH3_HUMAN]	HNRNPH3		0.979466	0.98338		9	11
P31943	Heterogeneous nuclear ribonucleoprotein H OS=Homo sapiens GN=HNRNPH1 PE=1 SV=4 - [HNRH1_HUMAN]	HNRNPH1	1.16605	1.14339	1.14625	11	11	9
P31946	14-3-3 protein beta/alpha OS=Homo sapiens GN=YWHAB PE=1 SV=3 - [1433B_HUMAN]	YWHAB	0.590148	0.772358	0.955789	1	2	1
P31946-2	Isoform Short of 14-3-3 protein beta/alpha OS=Homo sapiens GN=YWHAB - [1433B_HUMAN]	YWHAB	1.07722	0.459493	0.924281	2	2	3
P31947	14-3-3 protein sigma OS=Homo sapiens GN=SFN PE=1 SV=1 - [1433S_HUMAN]	SFN	1.22552	1.29063	1.20671	24	26	21
P31948	Stress-induced-phosphoprotein 1 OS=Homo sapiens GN=STIP1 PE=1 SV=1 - [STIP1_HUMAN]	STIP1	0.880057	0.87078	0.896483	50	51	51
P31949	Protein S100-A11 OS=Homo sapiens GN=S100A11 PE=1 SV=2 - [S10AB_HUMAN]	S100A11	0.962271	0.911983	0.928833	27	31	34
P32119	Peroxiredoxin-2 OS=Homo sapiens GN=PRDX2 PE=1 SV=5 - [PRDX2_HUMAN]	PRDX2	0.750018	0.813536	0.832351	11	12	11
P32321	Deoxycytidylate deaminase OS=Homo sapiens GN=DCTD PE=1 SV=2 - [DCTD_HUMAN]	DCTD	0.864939	0.991729	0.924346	3	4	4
P32456	Interferon-induced guanylate-binding protein 2 OS=Homo sapiens GN=GBP2 PE=1 SV=3 - [GBP2_HUMAN]	GBP2	1.16076	1.47024	1.21321	1	1	1
P32754-2	Isoform 2 of 4-hydroxyphenylpyruvate dioxygenase OS=Homo sapiens GN=HPD - [HPPD_HUMAN]	HPD	0.704159		1.30707	1		1
P32780-2	Isoform 2 of General transcription factor IIH subunit 1 OS=Homo sapiens GN=GTF2H1 - [TF2H1_HUMAN]	GTF2H1	1.43076	1.6	1.08423	2	1	3
P32929	Cystathionine gamma-lyase OS=Homo sapiens GN=CTH PE=1 SV=3 - [CGL_HUMAN]	CTH	0.678258	0.684066	0.612638	9	9	8
P32969	60S ribosomal protein L9 OS=Homo sapiens GN=RPL9 PE=1 SV=1 - [RL9_HUMAN]	RPL9	1.08601	1.01513	1.04262	24	26	22
P33121	Long-chain-fatty-acid--CoA ligase 1 OS=Homo sapiens GN=ACSL1 PE=1 SV=1 - [ACSL1_HUMAN]	ACSL1	1.35693	1.73769	1.56428	10	5	8
P33176	Kinesin-1 heavy chain OS=Homo sapiens GN=KIF5B PE=1 SV=1 - [KINH_HUMAN]	KIF5B	0.949727	0.909476	0.910333	26	26	29
P33240-2	Isoform 2 of Cleavage stimulation factor subunit 2 OS=Homo sapiens GN=CSTF2 - [CSTF2_HUMAN]	CSTF2	0.958256	0.931337	0.935303	10	13	6
P33316	Deoxyuridine 5'-triphosphate nucleotidohydrolase, mitochondrial OS=Homo sapiens GN=DUT PE=1 SV=4 - [DUT_HUMAN]	DUT	0.99644	1.12691	0.905093	6	7	10
P33527-7	Isoform 7 of Multidrug resistance-associated protein 1 OS=Homo sapiens GN=ABCC1 - [MRP1_HUMAN]	ABCC1			1.11255			6
P33764	Protein S100-A3 OS=Homo sapiens GN=S100A3 PE=1 SV=1 - [S10A3_HUMAN]	S100A3	0.742846	0.713124	0.740534	7	5	5
P33897	ATP-binding cassette sub-family D member 1 OS=Homo sapiens GN=ABCD1 PE=1 SV=2 - [ABCD1_HUMAN]	ABCD1	1.22249	1.29403	1.2285	3	6	5
P33981-2	Isoform 2 of Dual specificity protein kinase TTK OS=Homo sapiens GN=TTK - [TTK_HUMAN]	TTK		1.54719	1.22231		1	1
P33991	DNA replication licensing factor MCM4 OS=Homo sapiens GN=MCM4 PE=1 SV=5 - [MCM4_HUMAN]	MCM4	1.09958	1.10423	1.1432	26	25	22
P33992	DNA replication licensing factor MCM5 OS=Homo sapiens GN=MCM5 PE=1 SV=5 - [MCM5_HUMAN]	MCM5	1.2822	1.26844	1.32956	20	20	21
P33993	DNA replication licensing factor MCM7 OS=Homo sapiens GN=MCM7 PE=1 SV=4 - [MCM7_HUMAN]	MCM7	1.00679	1.05945	1.10621	25	29	29
P34096	Ribonuclease 4 OS=Homo sapiens GN=RNASE4 PE=1 SV=3 - [RNAS4_HUMAN]	RNASE4	1.1034		0.997167	1		1
P34896-2	Isoform 2 of Serine hydroxymethyltransferase, cytosolic OS=Homo sapiens GN=SHMT1 - [GLYC_HUMAN]	SHMT1	1.20871	1.04636	0.799432	6	5	6
P34897-3	Isoform 3 of Serine hydroxymethyltransferase, mitochondrial OS=Homo sapiens GN=SHMT2 - [GLYM_HUMAN]	SHMT2	1.05019	1.05327	1.0508	40	39	46
P34931	Heat shock 70 kDa protein 1-like OS=Homo sapiens GN=HSPA1L PE=1 SV=2 - [HS71L_HUMAN]	HSPA1L
P34932	Heat shock 70 kDa protein 4 OS=Homo sapiens GN=HSPA4 PE=1 SV=4 - [HSP74_HUMAN]	HSPA4	1.06899	1.06063	1.05699	38	40	40
P34949	Mannose-6-phosphate isomerase OS=Homo sapiens GN=MPI PE=1 SV=2 - [MPI_HUMAN]	MPI	1.14213		0.764656	1		2
P35052	Glypican-1 OS=Homo sapiens GN=GPC1 PE=1 SV=2 - [GPC1_HUMAN]	GPC1		1.24986	0.735443		1	1
P35080-2	Isoform IIb of Profilin-2 OS=Homo sapiens GN=PFN2 - [PROF2_HUMAN]	PFN2	0.890171		0.668668	4		4
P35221	Catenin alpha-1 OS=Homo sapiens GN=CTNNA1 PE=1 SV=1 - [CTNA1_HUMAN]	CTNNA1	1.10169	1.14596	1.18745	36	37	41
P35222	Catenin beta-1 OS=Homo sapiens GN=CTNNB1 PE=1 SV=1 - [CTNB1_HUMAN]	CTNNB1	1.18801	1.1486	1.1023	10	10	16
P35232	Prohibitin OS=Homo sapiens GN=PHB PE=1 SV=1 - [PHB_HUMAN]	PHB	1.13825	1.13227	1.14277	21	19	20
P35237	Serpin B6 OS=Homo sapiens GN=SERPINB6 PE=1 SV=3 - [SPB6_HUMAN]	SERPINB6	0.942586	1.0286	1.02302	7	9	11
P35241	Radixin OS=Homo sapiens GN=RDX PE=1 SV=1 - [RADI_HUMAN]	RDX	0.885042	0.96182	0.85801	13	7	8
P35244	Replication protein A 14 kDa subunit OS=Homo sapiens GN=RPA3 PE=1 SV=1 - [RFA3_HUMAN]	RPA3	1.05121	1.17274	1.08329	1	3	1
P35249	Replication factor C subunit 4 OS=Homo sapiens GN=RFC4 PE=1 SV=2 - [RFC4_HUMAN]	RFC4	0.903575	0.916125	0.874147	6	6	3
P35250-2	Isoform 2 of Replication factor C subunit 2 OS=Homo sapiens GN=RFC2 - [RFC2_HUMAN]	RFC2			0.60228			1
P35251-2	Isoform 2 of Replication factor C subunit 1 OS=Homo sapiens GN=RFC1 - [RFC1_HUMAN]	RFC1	1.15235	0.839519	1.01703	1	2	1
P35268	60S ribosomal protein L22 OS=Homo sapiens GN=RPL22 PE=1 SV=2 - [RL22_HUMAN]	RPL22	1.02793	1.04932	1.09114	12	11	11
P35270	Sepiapterin reductase OS=Homo sapiens GN=SPR PE=1 SV=1 - [SPRE_HUMAN]	SPR	1.00556	0.982126	1.00565	17	19	17
P35520	Cystathionine beta-synthase OS=Homo sapiens GN=CBS PE=1 SV=2 - [CBS_HUMAN]	CBS	0.538733	0.383476	0.367139	3	2	2
P35573-2	Isoform 5 of Glycogen debranching enzyme OS=Homo sapiens GN=AGL - [GDE_HUMAN]	AGL	0.882329	1.13375	0.97381	3	2	1
P35579	Myosin-9 OS=Homo sapiens GN=MYH9 PE=1 SV=4 - [MYH9_HUMAN]	MYH9	1.05201	1.07783	1.05111	174	155	166
P35580	Myosin-10 OS=Homo sapiens GN=MYH10 PE=1 SV=3 - [MYH10_HUMAN]	MYH10	1.03454	1.1235	1.06676	27	30	27
P35606-2	Isoform 2 of Coatomer subunit beta' OS=Homo sapiens GN=COPB2 - [COPB2_HUMAN]	COPB2	0.885251	0.885596	0.81878	30	35	30
P35610-3	Isoform 3 of Sterol O-acyltransferase 1 OS=Homo sapiens GN=SOAT1 - [SOAT1_HUMAN]	SOAT1		1.28905	1.07209		1	1
P35611-2	Isoform 2 of Alpha-adducin OS=Homo sapiens GN=ADD1 - [ADDA_HUMAN]	ADD1	0.983453	1.24089	0.884469	4	5	4
P35613-2	Isoform 2 of Basigin OS=Homo sapiens GN=BSG - [BASI_HUMAN]	BSG	0.822477	0.832326	0.782158	10	12	11
P35637-2	Isoform Short of RNA-binding protein FUS OS=Homo sapiens GN=FUS - [FUS_HUMAN]	FUS	1.23447	1.20626	1.18316	20	18	24
P35658-2	Isoform 2 of Nuclear pore complex protein Nup214 OS=Homo sapiens GN=NUP214 - [NU214_HUMAN]	NUP214	0.982089	1.01094	1.01248	7	9	13
P35659	Protein DEK OS=Homo sapiens GN=DEK PE=1 SV=1 - [DEK_HUMAN]	DEK	1.06617	1.01407	0.941655	12	14	10
P35754	Glutaredoxin-1 OS=Homo sapiens GN=GLRX PE=1 SV=2 - [GLRX1_HUMAN]	GLRX	1.12601	1.17313	1.15906	10	11	10
P35790-2	Isoform 2 of Choline kinase alpha OS=Homo sapiens GN=CHKA - [CHKA_HUMAN]	CHKA		0.794795	0.632743		1	1
P35813-2	Isoform Alpha-2 of Protein phosphatase 1A OS=Homo sapiens GN=PPM1A - [PPM1A_HUMAN]	PPM1A	0.782114	0.768493	0.738997	3	1	2
P35869	Aryl hydrocarbon receptor OS=Homo sapiens GN=AHR PE=1 SV=2 - [AHR_HUMAN]	AHR	0.839501	2.01353	1.09328	3	1	1
P35900	Keratin, type I cytoskeletal 20 OS=Homo sapiens GN=KRT20 PE=1 SV=1 - [K1C20_HUMAN]	KRT20	1.47932	1.49051	1.48048	105	103	99
P35914	Hydroxymethylglutaryl-CoA lyase, mitochondrial OS=Homo sapiens GN=HMGCL PE=1 SV=2 - [HMGCL_HUMAN]	HMGCL	0.913671	1.06809	1.1693	6	7	8
P35998	26S protease regulatory subunit 7 OS=Homo sapiens GN=PSMC2 PE=1 SV=3 - [PRS7_HUMAN]	PSMC2	0.869269	0.880943	0.917357	20	23	20
P36404	ADP-ribosylation factor-like protein 2 OS=Homo sapiens GN=ARL2 PE=1 SV=4 - [ARL2_HUMAN]	ARL2	1.02984	0.980351	0.933929	5	4	4
P36405	ADP-ribosylation factor-like protein 3 OS=Homo sapiens GN=ARL3 PE=1 SV=2 - [ARL3_HUMAN]	ARL3	1.01441	0.843018	0.991078	2	3	2
P36507	Dual specificity mitogen-activated protein kinase kinase 2 OS=Homo sapiens GN=MAP2K2 PE=1 SV=1 - [MP2K2_HUMAN]	MAP2K2	0.50705	0.81805	0.542425	3	1	2
P36542-2	Isoform Heart of ATP synthase subunit gamma, mitochondrial OS=Homo sapiens GN=ATP5C1 - [ATPG_HUMAN]	ATP5C1	1.15918		1.19163	9		12
P36543	V-type proton ATPase subunit E 1 OS=Homo sapiens GN=ATP6V1E1 PE=1 SV=1 - [VATE1_HUMAN]	ATP6V1E1	1.09665	0.998092	1.03247	5	6	5
P36551	Oxygen-dependent coproporphyrinogen-III oxidase, mitochondrial OS=Homo sapiens GN=CPOX PE=1 SV=3 - [HEM6_HUMAN]	CPOX	0.996842	0.950883	0.936163	16	19	20
P36578	60S ribosomal protein L4 OS=Homo sapiens GN=RPL4 PE=1 SV=5 - [RL4_HUMAN]	RPL4	1.03687	1.06158	1.03098	46	45	45
P36639-4	Isoform p18 of 7,8-dihydro-8-oxoguanine triphosphatase OS=Homo sapiens GN=NUDT1 - [8ODP_HUMAN]	NUDT1			0.758115			1
P36776-2	Isoform 2 of Lon protease homolog, mitochondrial OS=Homo sapiens GN=LONP1 - [LONM_HUMAN]	LONP1	1.3286	1.31265	1.30247	28	26	28
P36871	Phosphoglucomutase-1 OS=Homo sapiens GN=PGM1 PE=1 SV=3 - [PGM1_HUMAN]	PGM1	0.993827	0.985101	0.978966	20	16	14
P36873	Serine/threonine-protein phosphatase PP1-gamma catalytic subunit OS=Homo sapiens GN=PPP1CC PE=1 SV=1 - [PP1G_HUMAN]	PPP1CC	1.02137	0.981911	0.876204	5	5	4
P36915	Guanine nucleotide-binding protein-like 1 OS=Homo sapiens GN=GNL1 PE=1 SV=2 - [GNL1_HUMAN]	GNL1	0.874125	1.00872	0.591784	3	2	3
P36957	Dihydrolipoyllysine-residue succinyltransferase component of 2-oxoglutarate dehydrogenase complex, mitochondrial OS=Homo sapiens GN=DLST PE=1 SV=4 - [ODO2_HUMAN]	DLST	1.07064	1.04337	1.03567	7	7	9
P37059	Estradiol 17-beta-dehydrogenase 2 OS=Homo sapiens GN=HSD17B2 PE=1 SV=1 - [DHB2_HUMAN]	HSD17B2	1.75502	2.31707	1.69623	4	4	5
P37108	Signal recognition particle 14 kDa protein OS=Homo sapiens GN=SRP14 PE=1 SV=2 - [SRP14_HUMAN]	SRP14	1.20764	1.09785	1.30018	4	2	4
P37198	Nuclear pore glycoprotein p62 OS=Homo sapiens GN=NUP62 PE=1 SV=3 - [NUP62_HUMAN]	NUP62	1.01061	1.03401	0.965165	7	6	8
P37235	Hippocalcin-like protein 1 OS=Homo sapiens GN=HPCAL1 PE=1 SV=3 - [HPCL1_HUMAN]	HPCAL1	0.707812	0.829553	0.827675	10	11	11
P37268-4	Isoform 4 of Squalene synthase OS=Homo sapiens GN=FDFT1 - [FDFT_HUMAN]	FDFT1			0.553567			3
P37802	Transgelin-2 OS=Homo sapiens GN=TAGLN2 PE=1 SV=3 - [TAGL2_HUMAN]	TAGLN2	1.16005	1.16572	1.16537	34	41	37
P37837	Transaldolase OS=Homo sapiens GN=TALDO1 PE=1 SV=2 - [TALDO_HUMAN]	TALDO1	1.12037	1.12035	1.10218	44	51	50
P38117	Electron transfer flavoprotein subunit beta OS=Homo sapiens GN=ETFB PE=1 SV=3 - [ETFB_HUMAN]	ETFB	1.28149	1.32001	1.29743	31	37	37
P38159	RNA-binding motif protein, X chromosome OS=Homo sapiens GN=RBMX PE=1 SV=3 - [RBMX_HUMAN]	RBMX	1.08266	1.09105	1.13731	17	18	8
P38432	Coilin OS=Homo sapiens GN=COIL PE=1 SV=1 - [COIL_HUMAN]	COIL	1.47433	0.886377	1.58602	1	1	2
P38435	Vitamin K-dependent gamma-carboxylase OS=Homo sapiens GN=GGCX PE=1 SV=2 - [VKGC_HUMAN]	GGCX	1.26178	1.50525	0.839977	2	1	2
P38606-2	Isoform 2 of V-type proton ATPase catalytic subunit A OS=Homo sapiens GN=ATP6V1A - [VATA_HUMAN]	ATP6V1A	1.0678	0.955922	1.04357	17	17	16
P38646	Stress-70 protein, mitochondrial OS=Homo sapiens GN=HSPA9 PE=1 SV=2 - [GRP75_HUMAN]	HSPA9	1.13898	1.12653	1.14652	61	55	64
P38919	Eukaryotic initiation factor 4A-III OS=Homo sapiens GN=EIF4A3 PE=1 SV=4 - [IF4A3_HUMAN]	EIF4A3	1.06295	1.10451	1.0961	23	22	21
P38935	DNA-binding protein SMUBP-2 OS=Homo sapiens GN=IGHMBP2 PE=1 SV=3 - [SMBP2_HUMAN]	IGHMBP2	1.1	0.688934	1.08874	1	1	1
P39019	40S ribosomal protein S19 OS=Homo sapiens GN=RPS19 PE=1 SV=2 - [RS19_HUMAN]	RPS19	1.02624	0.989311	0.999798	18	18	18
P39023	60S ribosomal protein L3 OS=Homo sapiens GN=RPL3 PE=1 SV=2 - [RL3_HUMAN]	RPL3	1.06447	1.09552	1.03885	26	29	33
P39210	Protein Mpv17 OS=Homo sapiens GN=MPV17 PE=1 SV=1 - [MPV17_HUMAN]	MPV17	1.06398	1.00373	1.00701	2	2	2
P39656-3	Isoform 3 of Dolichyl-diphosphooligosaccharide--protein glycosyltransferase 48 kDa subunit OS=Homo sapiens GN=DDOST - [OST48_HUMAN]	DDOST	1.0301	1.00056	1.02352	15	14	13
P39687	Acidic leucine-rich nuclear phosphoprotein 32 family member A OS=Homo sapiens GN=ANP32A PE=1 SV=1 - [AN32A_HUMAN]	ANP32A	1.10972	1.03643	1.00873	8	9	7
P39748	Flap endonuclease 1 OS=Homo sapiens GN=FEN1 PE=1 SV=1 - [FEN1_HUMAN]	FEN1	1.21065	1.22252	1.23319	7	10	6
P39880-6	Isoform 7 of Homeobox protein cut-like 1 OS=Homo sapiens GN=CUX1 - [CUX1_HUMAN]	CUX1
P39880-9	Isoform 11 of Homeobox protein cut-like 1 OS=Homo sapiens GN=CUX1 - [CUX1_HUMAN]	CUX1		0.838968			2
P40121	Macrophage-capping protein OS=Homo sapiens GN=CAPG PE=1 SV=2 - [CAPG_HUMAN]	CAPG	1.13646	1.13552	1.15287	29	31	28
P40123-2	Isoform 2 of Adenylyl cyclase-associated protein 2 OS=Homo sapiens GN=CAP2 - [CAP2_HUMAN]	CAP2	0.823588	0.750345	1.01043	2	1	2
P40199	Carcinoembryonic antigen-related cell adhesion molecule 6 OS=Homo sapiens GN=CEACAM6 PE=1 SV=3 - [CEAM6_HUMAN]	CEACAM6	1.12456	1.16388	1.12055	8	5	8
P40222	Alpha-taxilin OS=Homo sapiens GN=TXLNA PE=1 SV=3 - [TXLNA_HUMAN]	TXLNA	0.816026	0.6199	0.740605	5	5	3
P40227	T-complex protein 1 subunit zeta OS=Homo sapiens GN=CCT6A PE=1 SV=3 - [TCPZ_HUMAN]	CCT6A	1.01275	1.02098	1.00485	56	51	49
P40306	Proteasome subunit beta type-10 OS=Homo sapiens GN=PSMB10 PE=1 SV=1 - [PSB10_HUMAN]	PSMB10		1.435	0.999624		2	1
P40337-3	Isoform 3 of Von Hippel-Lindau disease tumor suppressor OS=Homo sapiens GN=VHL - [VHL_HUMAN]	VHL
P40429	60S ribosomal protein L13a OS=Homo sapiens GN=RPL13A PE=1 SV=2 - [RL13A_HUMAN]	RPL13A	1.05957	1.06158	1.05115	16	18	20
P40616-2	Isoform 2 of ADP-ribosylation factor-like protein 1 OS=Homo sapiens GN=ARL1 - [ARL1_HUMAN]	ARL1	1.1099	1.15205	1.18623	5	6	6
P40763-3	Isoform 3 of Signal transducer and activator of transcription 3 OS=Homo sapiens GN=STAT3 - [STAT3_HUMAN]	STAT3	0.839655		0.797823	10		8
P40855	Peroxisomal biogenesis factor 19 OS=Homo sapiens GN=PEX19 PE=1 SV=1 - [PEX19_HUMAN]	PEX19	1.02039	1.0092	1.01504	3	6	7
P40925	Malate dehydrogenase, cytoplasmic OS=Homo sapiens GN=MDH1 PE=1 SV=4 - [MDHC_HUMAN]	MDH1	1.15643	1.13872	1.18996	20	21	20
P40926	Malate dehydrogenase, mitochondrial OS=Homo sapiens GN=MDH2 PE=1 SV=3 - [MDHM_HUMAN]	MDH2	1.05657	1.12897	1.10013	47	50	42
P40937-2	Isoform 2 of Replication factor C subunit 5 OS=Homo sapiens GN=RFC5 - [RFC5_HUMAN]	RFC5	0.632454	1.11661	0.825419	2	4	2
P40938-2	Isoform 2 of Replication factor C subunit 3 OS=Homo sapiens GN=RFC3 - [RFC3_HUMAN]	RFC3	0.867305	0.948584	0.768136	3	6	3
P40939	Trifunctional enzyme subunit alpha, mitochondrial OS=Homo sapiens GN=HADHA PE=1 SV=2 - [ECHA_HUMAN]	HADHA	1.07814	1.08757	1.09492	51	43	49
P41091	Eukaryotic translation initiation factor 2 subunit 3 OS=Homo sapiens GN=EIF2S3 PE=1 SV=3 - [IF2G_HUMAN]	EIF2S3	0.888478	0.919679	0.887308	27	28	32
P41134-2	Isoform ID-B of DNA-binding protein inhibitor ID-1 OS=Homo sapiens GN=ID1 - [ID1_HUMAN]	ID1			0.764101			1
P41208	Centrin-2 OS=Homo sapiens GN=CETN2 PE=1 SV=1 - [CETN2_HUMAN]	CETN2	0.880443	0.885357	0.868055	2	2	2
P41223	Protein BUD31 homolog OS=Homo sapiens GN=BUD31 PE=1 SV=2 - [BUD31_HUMAN]	BUD31	1.02968	1.00151	1.18275	5	4	4
P41227-2	Isoform 2 of N-alpha-acetyltransferase 10 OS=Homo sapiens GN=NAA10 - [NAA10_HUMAN]	NAA10	0.905472	0.78898	0.950382	5	5	5
P41235-7	Isoform HNF4-Alpha-9 of Hepatocyte nuclear factor 4-alpha OS=Homo sapiens GN=HNF4A - [HNF4A_HUMAN]	HNF4A			1.54138			1
P41240	Tyrosine-protein kinase CSK OS=Homo sapiens GN=CSK PE=1 SV=1 - [CSK_HUMAN]	CSK	0.945587	1.036	0.738679	4	5	6
P41250	Glycine--tRNA ligase OS=Homo sapiens GN=GARS PE=1 SV=3 - [SYG_HUMAN]	GARS	1.00988	1.03304	1.04298	33	41	34
P41252	Isoleucine--tRNA ligase, cytoplasmic OS=Homo sapiens GN=IARS PE=1 SV=2 - [SYIC_HUMAN]	IARS	0.937217	0.929549	0.905307	50	51	57
P41567	Eukaryotic translation initiation factor 1 OS=Homo sapiens GN=EIF1 PE=1 SV=1 - [EIF1_HUMAN]	EIF1	0.910471	0.932911	0.987273	16	5	16
P41732	Tetraspanin-7 OS=Homo sapiens GN=TSPAN7 PE=1 SV=2 - [TSN7_HUMAN]	TSPAN7
P41743	Protein kinase C iota type OS=Homo sapiens GN=PRKCI PE=1 SV=2 - [KPCI_HUMAN]	PRKCI	1.06963	0.75267	0.955174	1	1	2
P42126-2	Isoform 2 of Enoyl-CoA delta isomerase 1, mitochondrial OS=Homo sapiens GN=ECI1 - [ECI1_HUMAN]	ECI1	1.20271	1.24415	1.19336	9	10	10
P42166	Lamina-associated polypeptide 2, isoform alpha OS=Homo sapiens GN=TMPO PE=1 SV=2 - [LAP2A_HUMAN]	TMPO	1.13826	1.0766	1.15181	22	22	20
P42167	Lamina-associated polypeptide 2, isoforms beta/gamma OS=Homo sapiens GN=TMPO PE=1 SV=2 - [LAP2B_HUMAN]	TMPO	1.04737	1.03278	1.05597	17	15	13
P42226	Signal transducer and activator of transcription 6 OS=Homo sapiens GN=STAT6 PE=1 SV=1 - [STAT6_HUMAN]	STAT6	1.00469	1.041	0.837731	2	2	2
P42229-2	Isoform 2 of Signal transducer and activator of transcription 5A OS=Homo sapiens GN=STAT5A - [STA5A_HUMAN]	STAT5A		1.38548	1.55271		1	1
P42285	Superkiller viralicidic activity 2-like 2 OS=Homo sapiens GN=SKIV2L2 PE=1 SV=3 - [SK2L2_HUMAN]	SKIV2L2	0.974755	1.10395	0.977588	18	17	17
P42330	Aldo-keto reductase family 1 member C3 OS=Homo sapiens GN=AKR1C3 PE=1 SV=4 - [AK1C3_HUMAN]	AKR1C3	0.70871	0.733655	0.749187	3	3	1
P42330-2	Isoform 2 of Aldo-keto reductase family 1 member C3 OS=Homo sapiens GN=AKR1C3 - [AK1C3_HUMAN]	AKR1C3	0.736838	0.701996	0.638156	3	4	4
P42345	Serine/threonine-protein kinase mTOR OS=Homo sapiens GN=MTOR PE=1 SV=1 - [MTOR_HUMAN]	MTOR		1.96582	0.845322		1	3
P42356-2	Isoform 2 of Phosphatidylinositol 4-kinase alpha OS=Homo sapiens GN=PI4KA - [PI4KA_HUMAN]	PI4KA			0.969696			2
P42566	Epidermal growth factor receptor substrate 15 OS=Homo sapiens GN=EPS15 PE=1 SV=2 - [EPS15_HUMAN]	EPS15	0.67193	0.374998	0.797844	2	1	2
P42574	Caspase-3 OS=Homo sapiens GN=CASP3 PE=1 SV=2 - [CASP3_HUMAN]	CASP3	0.747824	0.695185	0.666095	1	2	1
P42684-4	Isoform 4 of Abelson tyrosine-protein kinase 2 OS=Homo sapiens GN=ABL2 - [ABL2_HUMAN]	ABL2	1.03548		0.851192	2		1
P42685-2	Isoform 2 of Tyrosine-protein kinase FRK OS=Homo sapiens GN=FRK - [FRK_HUMAN]	FRK	1.41228	1.1854	1.14771	1	1	1
P42695	Condensin-2 complex subunit D3 OS=Homo sapiens GN=NCAPD3 PE=1 SV=2 - [CNDD3_HUMAN]	NCAPD3	1.02218	0.647911	0.6466	1	1	1
P42704	Leucine-rich PPR motif-containing protein, mitochondrial OS=Homo sapiens GN=LRPPRC PE=1 SV=3 - [LPPRC_HUMAN]	LRPPRC	0.946268	0.933928	0.95219	99	92	92
P42765	3-ketoacyl-CoA thiolase, mitochondrial OS=Homo sapiens GN=ACAA2 PE=1 SV=2 - [THIM_HUMAN]	ACAA2	1.5673	1.57216	1.52276	21	19	20
P42766	60S ribosomal protein L35 OS=Homo sapiens GN=RPL35 PE=1 SV=2 - [RL35_HUMAN]	RPL35	1.03175	1.08268	1.04157	16	16	12
P43007	Neutral amino acid transporter A OS=Homo sapiens GN=SLC1A4 PE=1 SV=1 - [SATT_HUMAN]	SLC1A4	1.1732	1.07885	1.3044	2	2	1
P43034	Platelet-activating factor acetylhydrolase IB subunit alpha OS=Homo sapiens GN=PAFAH1B1 PE=1 SV=2 - [LIS1_HUMAN]	PAFAH1B1	1.10085	0.894696	0.982589	13	14	14
P43155-2	Isoform 2 of Carnitine O-acetyltransferase OS=Homo sapiens GN=CRAT - [CACP_HUMAN]	CRAT		1.77476	1.83699		1	1
P43243	Matrin-3 OS=Homo sapiens GN=MATR3 PE=1 SV=2 - [MATR3_HUMAN]	MATR3	1.01699	1.06592	1.06084	31	31	33
P43246	DNA mismatch repair protein Msh2 OS=Homo sapiens GN=MSH2 PE=1 SV=1 - [MSH2_HUMAN]	MSH2	0.901685	0.962517	1.15724	16	15	13
P43250-3	Isoform GRK6C of G protein-coupled receptor kinase 6 OS=Homo sapiens GN=GRK6 - [GRK6_HUMAN]	GRK6	1.3904		1.37113	1		1
P43304	Glycerol-3-phosphate dehydrogenase, mitochondrial OS=Homo sapiens GN=GPD2 PE=1 SV=3 - [GPDM_HUMAN]	GPD2	1.16355	1.03225	1.07801	20	17	20
P43307	Translocon-associated protein subunit alpha OS=Homo sapiens GN=SSR1 PE=1 SV=3 - [SSRA_HUMAN]	SSR1	1.04702	1.08177	1.06984	6	5	6
P43487-2	Isoform 2 of Ran-specific GTPase-activating protein OS=Homo sapiens GN=RANBP1 - [RANG_HUMAN]	RANBP1	1.02044	1.04817	0.985492	10	9	9
P43490	Nicotinamide phosphoribosyltransferase OS=Homo sapiens GN=NAMPT PE=1 SV=1 - [NAMPT_HUMAN]	NAMPT	0.934144	0.93362	0.933274	118	119	119
P43686	26S protease regulatory subunit 6B OS=Homo sapiens GN=PSMC4 PE=1 SV=2 - [PRS6B_HUMAN]	PSMC4	0.985609	1.01319	0.909677	18	24	21
P43897	Elongation factor Ts, mitochondrial OS=Homo sapiens GN=TSFM PE=1 SV=2 - [EFTS_HUMAN]	TSFM	1.29724	0.963712	1.32176	6	3	3
P45877	Peptidyl-prolyl cis-trans isomerase C OS=Homo sapiens GN=PPIC PE=1 SV=1 - [PPIC_HUMAN]	PPIC	0.554267	1.00593	0.709312	2	2	2
P45880-2	Isoform 2 of Voltage-dependent anion-selective channel protein 2 OS=Homo sapiens GN=VDAC2 - [VDAC2_HUMAN]	VDAC2	1.0498	1.05652	1.08326	24	26	24
P45954-2	Isoform 2 of Short/branched chain specific acyl-CoA dehydrogenase, mitochondrial OS=Homo sapiens GN=ACADSB - [ACDSB_HUMAN]	ACADSB	1.31905	1.51586		2	1
P45973	Chromobox protein homolog 5 OS=Homo sapiens GN=CBX5 PE=1 SV=1 - [CBX5_HUMAN]	CBX5	1.17714	1.11623	1.11434	7	7	8
P45974-2	Isoform Short of Ubiquitin carboxyl-terminal hydrolase 5 OS=Homo sapiens GN=USP5 - [UBP5_HUMAN]	USP5	0.86938	0.89966	0.887176	28	25	30
P45984-2	Isoform Alpha-1 of Mitogen-activated protein kinase 9 OS=Homo sapiens GN=MAPK9 - [MK09_HUMAN]	MAPK9	0.582504		0.718068	1		1
P45985	Dual specificity mitogen-activated protein kinase kinase 4 OS=Homo sapiens GN=MAP2K4 PE=1 SV=1 - [MP2K4_HUMAN]	MAP2K4	0.727251	0.798726	0.799226	1	1	1
P46013	Antigen KI-67 OS=Homo sapiens GN=MKI67 PE=1 SV=2 - [KI67_HUMAN]	MKI67	1.80676	1.92007	1.45942	10	6	9
P46060	Ran GTPase-activating protein 1 OS=Homo sapiens GN=RANGAP1 PE=1 SV=1 - [RAGP1_HUMAN]	RANGAP1	1.02082	1.05501	1.11555	19	18	15
P46063	ATP-dependent DNA helicase Q1 OS=Homo sapiens GN=RECQL PE=1 SV=3 - [RECQ1_HUMAN]	RECQL	1.05191	1.07017	1.12393	18	18	20
P46087-2	Isoform 2 of Probable 28S rRNA (cytosine(4447)-C(5))-methyltransferase OS=Homo sapiens GN=NOP2 - [NOP2_HUMAN]	NOP2	1.08968	1.08439	1.04966	16	24	17
P46100	Transcriptional regulator ATRX OS=Homo sapiens GN=ATRX PE=1 SV=5 - [ATRX_HUMAN]	ATRX
P46108	Adapter molecule crk OS=Homo sapiens GN=CRK PE=1 SV=2 - [CRK_HUMAN]	CRK	1.24241	1.12547	1.2402	4	3	6
P46109	Crk-like protein OS=Homo sapiens GN=CRKL PE=1 SV=1 - [CRKL_HUMAN]	CRKL	0.988542	0.967741	0.691675	4	4	5
P46199	Translation initiation factor IF-2, mitochondrial OS=Homo sapiens GN=MTIF2 PE=1 SV=2 - [IF2M_HUMAN]	MTIF2	0.81388	0.648485	0.788364	2	3	2
P46379-2	Isoform 2 of Large proline-rich protein BAG6 OS=Homo sapiens GN=BAG6 - [BAG6_HUMAN]	BAG6		0.979003	0.964515		14	13
P46459	Vesicle-fusing ATPase OS=Homo sapiens GN=NSF PE=1 SV=3 - [NSF_HUMAN]	NSF	0.915141	0.869473	0.8876	19	14	21
P46734	Dual specificity mitogen-activated protein kinase kinase 3 OS=Homo sapiens GN=MAP2K3 PE=1 SV=2 - [MP2K3_HUMAN]	MAP2K3		1.19715	1.13948		4	4
P46736-4	Isoform 4 of Lys-63-specific deubiquitinase BRCC36 OS=Homo sapiens GN=BRCC3 - [BRCC3_HUMAN]	BRCC3			0.74339			3
P46776	60S ribosomal protein L27a OS=Homo sapiens GN=RPL27A PE=1 SV=2 - [RL27A_HUMAN]	RPL27A	1.06099	1.07026	1.02592	16	12	12
P46777	60S ribosomal protein L5 OS=Homo sapiens GN=RPL5 PE=1 SV=3 - [RL5_HUMAN]	RPL5	1.08512	0.986391	1.02165	20	23	24
P46778	60S ribosomal protein L21 OS=Homo sapiens GN=RPL21 PE=1 SV=2 - [RL21_HUMAN]	RPL21	1.08552	1.046	1.09903	8	7	6
P46779	60S ribosomal protein L28 OS=Homo sapiens GN=RPL28 PE=1 SV=3 - [RL28_HUMAN]	RPL28	1.08423	0.980742	1.10621	6	5	7
P46781	40S ribosomal protein S9 OS=Homo sapiens GN=RPS9 PE=1 SV=3 - [RS9_HUMAN]	RPS9	0.990523	0.991887	1.01574	24	19	23
P46782	40S ribosomal protein S5 OS=Homo sapiens GN=RPS5 PE=1 SV=4 - [RS5_HUMAN]	RPS5	0.920407	0.917852	0.955871	11	11	8
P46783	40S ribosomal protein S10 OS=Homo sapiens GN=RPS10 PE=1 SV=1 - [RS10_HUMAN]	RPS10	0.98623	1.03312	1.00223	10	10	11
P46926	Glucosamine-6-phosphate isomerase 1 OS=Homo sapiens GN=GNPDA1 PE=1 SV=1 - [GNPI1_HUMAN]	GNPDA1	1.34283	1.5863	1.56075	10	7	9
P46934-4	Isoform 4 of E3 ubiquitin-protein ligase NEDD4 OS=Homo sapiens GN=NEDD4 - [NEDD4_HUMAN]	NEDD4	0.890876	0.977647	0.979055	5	5	10
P46937-5	Isoform 5 of Transcriptional coactivator YAP1 OS=Homo sapiens GN=YAP1 - [YAP1_HUMAN]	YAP1	1.19285	1.02315	0.821681	3	5	2
P46939	Utrophin OS=Homo sapiens GN=UTRN PE=1 SV=2 - [UTRO_HUMAN]	UTRN	1.19008	1.96995	1.21151	2	1	1
P46940	Ras GTPase-activating-like protein IQGAP1 OS=Homo sapiens GN=IQGAP1 PE=1 SV=1 - [IQGA1_HUMAN]	IQGAP1	0.976098	0.97429	0.977359	72	73	71
P46976-2	Isoform GN-1 of Glycogenin-1 OS=Homo sapiens GN=GYG1 - [GLYG_HUMAN]	GYG1	0.963787	0.909928	1.17964	3	2	3
P46977	Dolichyl-diphosphooligosaccharide--protein glycosyltransferase subunit STT3A OS=Homo sapiens GN=STT3A PE=1 SV=2 - [STT3A_HUMAN]	STT3A	1.02229	1.17267	0.997855	11	9	11
P47736	Rap1 GTPase-activating protein 1 OS=Homo sapiens GN=RAP1GAP PE=1 SV=2 - [RPGP1_HUMAN]	RAP1GAP	0.487551	1.94017	0.556729	1	2	3
P47755	F-actin-capping protein subunit alpha-2 OS=Homo sapiens GN=CAPZA2 PE=1 SV=3 - [CAZA2_HUMAN]	CAPZA2	1.49414	1.32693	1.16709	7	7	11
P47756-2	Isoform 2 of F-actin-capping protein subunit beta OS=Homo sapiens GN=CAPZB - [CAPZB_HUMAN]	CAPZB	1.07216	1.10962	0.995007	21	20	19
P47897	Glutamine--tRNA ligase OS=Homo sapiens GN=QARS PE=1 SV=1 - [SYQ_HUMAN]	QARS	1.00444	1.12454	1.09141	20	21	23
P47914	60S ribosomal protein L29 OS=Homo sapiens GN=RPL29 PE=1 SV=2 - [RL29_HUMAN]	RPL29	1.04531	1.04032	1.04495	4	4	5
P47985	Cytochrome b-c1 complex subunit Rieske, mitochondrial OS=Homo sapiens GN=UQCRFS1 PE=1 SV=2 - [UCRI_HUMAN]	UQCRFS1	1.10942	1.18925	0.994147	12	12	12
P48047	ATP synthase subunit O, mitochondrial OS=Homo sapiens GN=ATP5O PE=1 SV=1 - [ATPO_HUMAN]	ATP5O	1.10058	1.08865	1.13987	11	10	9
P48059	LIM and senescent cell antigen-like-containing domain protein 1 OS=Homo sapiens GN=LIMS1 PE=1 SV=4 - [LIMS1_HUMAN]	LIMS1	0.806427	0.792934	0.822841	1	3	5
P48147	Prolyl endopeptidase OS=Homo sapiens GN=PREP PE=1 SV=2 - [PPCE_HUMAN]	PREP	0.829586	0.896674	1.14919	3	5	4
P48163	NADP-dependent malic enzyme OS=Homo sapiens GN=ME1 PE=1 SV=1 - [MAOX_HUMAN]	ME1	0.888772	0.934326	0.895716	32	32	35
P48200	Iron-responsive element-binding protein 2 OS=Homo sapiens GN=IREB2 PE=1 SV=3 - [IREB2_HUMAN]	IREB2	1.09361	0.980046	0.876638	4	3	4
P48426-2	Isoform 2 of Phosphatidylinositol 5-phosphate 4-kinase type-2 alpha OS=Homo sapiens GN=PIP4K2A - [PI42A_HUMAN]	PIP4K2A		1.00165	1.35974		2	1
P48444	Coatomer subunit delta OS=Homo sapiens GN=ARCN1 PE=1 SV=1 - [COPD_HUMAN]	ARCN1	0.887359	0.964651	0.937558	14	12	16
P48506	Glutamate--cysteine ligase catalytic subunit OS=Homo sapiens GN=GCLC PE=1 SV=2 - [GSH1_HUMAN]	GCLC	1.28292	1.33809	1.22544	22	19	21
P48507	Glutamate--cysteine ligase regulatory subunit OS=Homo sapiens GN=GCLM PE=1 SV=1 - [GSH0_HUMAN]	GCLM	1.09523	1.16022	1.02326	16	18	19
P48509	CD151 antigen OS=Homo sapiens GN=CD151 PE=1 SV=3 - [CD151_HUMAN]	CD151	0.862857	0.954808	1.12414	2	4	3
P48556	26S proteasome non-ATPase regulatory subunit 8 OS=Homo sapiens GN=PSMD8 PE=1 SV=2 - [PSMD8_HUMAN]	PSMD8	1.03371	0.928971	0.964769	8	6	7
P48634-3	Isoform 3 of Protein PRRC2A OS=Homo sapiens GN=PRRC2A - [PRC2A_HUMAN]	PRRC2A	1.47833	1.10593	1.0509	3	3	3
P48637	Glutathione synthetase OS=Homo sapiens GN=GSS PE=1 SV=1 - [GSHB_HUMAN]	GSS	0.919353	0.841219	0.861215	12	10	9
P48643	T-complex protein 1 subunit epsilon OS=Homo sapiens GN=CCT5 PE=1 SV=1 - [TCPE_HUMAN]	CCT5	1.06473	1.01499	1.00085	45	49	48
P48651-3	Isoform 3 of Phosphatidylserine synthase 1 OS=Homo sapiens GN=PTDSS1 - [PTSS1_HUMAN]	PTDSS1	1.079	0.642136	0.800824	1	2	2
P48681	Nestin OS=Homo sapiens GN=NES PE=1 SV=2 - [NEST_HUMAN]	NES	0.500613	0.849943	0.535245	1	1	3
P48729-3	Isoform 3 of Casein kinase I isoform alpha OS=Homo sapiens GN=CSNK1A1 - [KC1A_HUMAN]	CSNK1A1	1.2763	0.860174	1.20419	3	2	3
P48730	Casein kinase I isoform delta OS=Homo sapiens GN=CSNK1D PE=1 SV=2 - [KC1D_HUMAN]	CSNK1D	0.50398		0.664673	1		1
P48735-2	Isoform 2 of Isocitrate dehydrogenase [NADP], mitochondrial OS=Homo sapiens GN=IDH2 - [IDHP_HUMAN]	IDH2			1.07866			20
P48739	Phosphatidylinositol transfer protein beta isoform OS=Homo sapiens GN=PITPNB PE=1 SV=2 - [PIPNB_HUMAN]	PITPNB	0.937091	1.02519	1.08069	8	7	8
P48960-2	Isoform 2 of CD97 antigen OS=Homo sapiens GN=CD97 - [CD97_HUMAN]	CD97	1.10306	1.12146	0.943272	10	8	9
P49023-2	Isoform Alpha of Paxillin OS=Homo sapiens GN=PXN - [PAXI_HUMAN]	PXN	0.944236	0.897567	0.938884	6	7	8
P49189	4-trimethylaminobutyraldehyde dehydrogenase OS=Homo sapiens GN=ALDH9A1 PE=1 SV=3 - [AL9A1_HUMAN]	ALDH9A1	0.994827	0.927849	0.975011	10	11	10
P49207	60S ribosomal protein L34 OS=Homo sapiens GN=RPL34 PE=1 SV=3 - [RL34_HUMAN]	RPL34	1.05708	1.02372	1.04482	6	4	5
P49257	Protein ERGIC-53 OS=Homo sapiens GN=LMAN1 PE=1 SV=2 - [LMAN1_HUMAN]	LMAN1	1.13004	1.14434	0.925236	10	10	10
P49281-5	Isoform 5 of Natural resistance-associated macrophage protein 2 OS=Homo sapiens GN=SLC11A2 - [NRAM2_HUMAN]	SLC11A2			1.16922			1
P49321-2	Isoform 2 of Nuclear autoantigenic sperm protein OS=Homo sapiens GN=NASP - [NASP_HUMAN]	NASP	1.0668		1.0468	13		12
P49326-3	Isoform 3 of Dimethylaniline monooxygenase [N-oxide-forming] 5 OS=Homo sapiens GN=FMO5 - [FMO5_HUMAN]	FMO5
P49327	Fatty acid synthase OS=Homo sapiens GN=FASN PE=1 SV=3 - [FAS_HUMAN]	FASN	0.930869	0.936535	0.936498	162	174	158
P49354-2	Isoform 2 of Protein farnesyltransferase/geranylgeranyltransferase type-1 subunit alpha OS=Homo sapiens GN=FNTA - [FNTA_HUMAN]	FNTA	1.02812		1.02364	4		4
P49356	Protein farnesyltransferase subunit beta OS=Homo sapiens GN=FNTB PE=1 SV=1 - [FNTB_HUMAN]	FNTB	0.885262			1
P49368	T-complex protein 1 subunit gamma OS=Homo sapiens GN=CCT3 PE=1 SV=4 - [TCPG_HUMAN]	CCT3	0.938904	0.992484	0.943655	50	45	39
P49406	39S ribosomal protein L19, mitochondrial OS=Homo sapiens GN=MRPL19 PE=1 SV=2 - [RM19_HUMAN]	MRPL19	0.814983	0.951404	0.855595	1	1	1
P49407-2	Isoform 1B of Beta-arrestin-1 OS=Homo sapiens GN=ARRB1 - [ARRB1_HUMAN]	ARRB1	0.869876	0.879313	0.891751	7	7	5
P49411	Elongation factor Tu, mitochondrial OS=Homo sapiens GN=TUFM PE=1 SV=2 - [EFTU_HUMAN]	TUFM	1.39658	1.38178	1.37803	48	42	43
P49419-2	Isoform 2 of Alpha-aminoadipic semialdehyde dehydrogenase OS=Homo sapiens GN=ALDH7A1 - [AL7A1_HUMAN]	ALDH7A1	0.865591	0.920698	0.974932	12	8	12
P49458	Signal recognition particle 9 kDa protein OS=Homo sapiens GN=SRP9 PE=1 SV=2 - [SRP09_HUMAN]	SRP9	1.06746	1.17212	1.23235	4	6	3
P49459	Ubiquitin-conjugating enzyme E2 A OS=Homo sapiens GN=UBE2A PE=1 SV=2 - [UBE2A_HUMAN]	UBE2A		1.02125	0.93747		1	1
P49585	Choline-phosphate cytidylyltransferase A OS=Homo sapiens GN=PCYT1A PE=1 SV=2 - [PCY1A_HUMAN]	PCYT1A	1.17416	1.37922	1.23676	3	4	3
P49588	Alanine--tRNA ligase, cytoplasmic OS=Homo sapiens GN=AARS PE=1 SV=2 - [SYAC_HUMAN]	AARS	0.862388	0.871586	0.866677	51	48	46
P49589-3	Isoform 3 of Cysteine--tRNA ligase, cytoplasmic OS=Homo sapiens GN=CARS - [SYCC_HUMAN]	CARS	1.0777	0.995676	1.07505	23	20	18
P49591	Serine--tRNA ligase, cytoplasmic OS=Homo sapiens GN=SARS PE=1 SV=3 - [SYSC_HUMAN]	SARS	1.06612	1.08817	1.03995	24	23	22
P49593	Protein phosphatase 1F OS=Homo sapiens GN=PPM1F PE=1 SV=3 - [PPM1F_HUMAN]	PPM1F	0.673523	0.472496	0.663253	4	2	4
P49643	DNA primase large subunit OS=Homo sapiens GN=PRIM2 PE=1 SV=2 - [PRI2_HUMAN]	PRIM2	0.356863	0.379807	0.404027	1	1	1
P49662-2	Isoform 2 of Caspase-4 OS=Homo sapiens GN=CASP4 - [CASP4_HUMAN]	CASP4	0.844166	0.622418	0.747138	2	1	1
P49711	Transcriptional repressor CTCF OS=Homo sapiens GN=CTCF PE=1 SV=1 - [CTCF_HUMAN]	CTCF	1.09456	1.15755	1.03712	2	3	3
P49720	Proteasome subunit beta type-3 OS=Homo sapiens GN=PSMB3 PE=1 SV=2 - [PSB3_HUMAN]	PSMB3	1.06746	1.03301	1.07811	6	4	7
P49721	Proteasome subunit beta type-2 OS=Homo sapiens GN=PSMB2 PE=1 SV=1 - [PSB2_HUMAN]	PSMB2	1.11184	1.02896	0.96414	7	5	5
P49736	DNA replication licensing factor MCM2 OS=Homo sapiens GN=MCM2 PE=1 SV=4 - [MCM2_HUMAN]	MCM2	1.12908	1.11561	1.16342	24	25	23
P49748-2	Isoform 2 of Very long-chain specific acyl-CoA dehydrogenase, mitochondrial OS=Homo sapiens GN=ACADVL - [ACADV_HUMAN]	ACADVL	1.20122	1.24196	1.17367	28	30	29
P49750	YLP motif-containing protein 1 OS=Homo sapiens GN=YLPM1 PE=1 SV=3 - [YLPM1_HUMAN]	YLPM1	0.942677	0.946202	1.08242	2	3	4
P49755	Transmembrane emp24 domain-containing protein 10 OS=Homo sapiens GN=TMED10 PE=1 SV=2 - [TMEDA_HUMAN]	TMED10	0.998873	1.0239	1.01956	14	8	8
P49756	RNA-binding protein 25 OS=Homo sapiens GN=RBM25 PE=1 SV=3 - [RBM25_HUMAN]	RBM25	1.11212	1.13216	1.1654	11	9	8
P49761-3	Isoform 3 of Dual specificity protein kinase CLK3 OS=Homo sapiens GN=CLK3 - [CLK3_HUMAN]	CLK3	0.743671	0.541354	0.600282	1	1	1
P49770	Translation initiation factor eIF-2B subunit beta OS=Homo sapiens GN=EIF2B2 PE=1 SV=3 - [EI2BB_HUMAN]	EIF2B2	1.05543	0.409536	1.312	2	2	1
P49773	Histidine triad nucleotide-binding protein 1 OS=Homo sapiens GN=HINT1 PE=1 SV=2 - [HINT1_HUMAN]	HINT1	1.07446	1.14397	1.10345	9	11	9
P49790	Nuclear pore complex protein Nup153 OS=Homo sapiens GN=NUP153 PE=1 SV=2 - [NU153_HUMAN]	NUP153	0.971689	0.930029	0.856066	11	10	10
P49792	E3 SUMO-protein ligase RanBP2 OS=Homo sapiens GN=RANBP2 PE=1 SV=2 - [RBP2_HUMAN]	RANBP2	1.03291	0.994241	1.02418	29	23	24
P49821-2	Isoform 2 of NADH dehydrogenase [ubiquinone] flavoprotein 1, mitochondrial OS=Homo sapiens GN=NDUFV1 - [NDUV1_HUMAN]	NDUFV1	0.740801	0.918383	1.0012	5	5	7
P49840	Glycogen synthase kinase-3 alpha OS=Homo sapiens GN=GSK3A PE=1 SV=2 - [GSK3A_HUMAN]	GSK3A	1.08001	1.05767	1.30695	1	1	1
P49841	Glycogen synthase kinase-3 beta OS=Homo sapiens GN=GSK3B PE=1 SV=2 - [GSK3B_HUMAN]	GSK3B	0.925262	0.637544	0.92666	4	1	2
P49848-2	Isoform 2 of Transcription initiation factor TFIID subunit 6 OS=Homo sapiens GN=TAF6 - [TAF6_HUMAN]	TAF6	0.795738	1.24471	0.80699	2	1	1
P49902	Cytosolic purine 5'-nucleotidase OS=Homo sapiens GN=NT5C2 PE=1 SV=1 - [5NTC_HUMAN]	NT5C2	1.02915	0.958528	0.955063	7	6	9
P49903	Selenide, water dikinase 1 OS=Homo sapiens GN=SEPHS1 PE=1 SV=2 - [SPS1_HUMAN]	SEPHS1	2.01788		1.27286	1		3
P49914-2	Isoform 2 of 5-formyltetrahydrofolate cyclo-ligase OS=Homo sapiens GN=MTHFS - [MTHFS_HUMAN]	MTHFS	0.530724	0.733668	0.826976	2	3	4
P49915	GMP synthase [glutamine-hydrolyzing] OS=Homo sapiens GN=GMPS PE=1 SV=1 - [GUAA_HUMAN]	GMPS	0.927592	1.03049	0.935031	24	20	20
P49916-3	Isoform 3 of DNA ligase 3 OS=Homo sapiens GN=LIG3 - [DNLI3_HUMAN]	LIG3	1.24799	0.890392	1.22557	4	6	4
P49959-2	Isoform 2 of Double-strand break repair protein MRE11A OS=Homo sapiens GN=MRE11A - [MRE11_HUMAN]	MRE11A	0.988204	1.00281	0.918637	8	5	7
P50148	Guanine nucleotide-binding protein G(q) subunit alpha OS=Homo sapiens GN=GNAQ PE=1 SV=4 - [GNAQ_HUMAN]	GNAQ	1.35656	0.992298	1.23502	2	4	3
P50151	Guanine nucleotide-binding protein G(I)/G(S)/G(O) subunit gamma-10 OS=Homo sapiens GN=GNG10 PE=1 SV=1 - [GBG10_HUMAN]	GNG10		0.988655	0.923656		2	2
P50213	Isocitrate dehydrogenase [NAD] subunit alpha, mitochondrial OS=Homo sapiens GN=IDH3A PE=1 SV=1 - [IDH3A_HUMAN]	IDH3A	1.03982	1.02911	1.05698	15	14	15
P50225	Sulfotransferase 1A1 OS=Homo sapiens GN=SULT1A1 PE=1 SV=3 - [ST1A1_HUMAN]	SULT1A1	0.461336	0.38039	0.486896	2	3	1
P50336	Protoporphyrinogen oxidase OS=Homo sapiens GN=PPOX PE=1 SV=1 - [PPOX_HUMAN]	PPOX	0.787569	1.28948	1.19659	1	1	2
P50395	Rab GDP dissociation inhibitor beta OS=Homo sapiens GN=GDI2 PE=1 SV=2 - [GDIB_HUMAN]	GDI2	0.956228	0.944614	0.918663	29	29	32
P50402	Emerin OS=Homo sapiens GN=EMD PE=1 SV=1 - [EMD_HUMAN]	EMD	0.93931	0.780103	0.861244	7	10	9
P50416-2	Isoform 2 of Carnitine O-palmitoyltransferase 1, liver isoform OS=Homo sapiens GN=CPT1A - [CPT1A_HUMAN]	CPT1A	1.07594	1.11323	1.05418	19	17	20
P50440-2	Isoform 2 of Glycine amidinotransferase, mitochondrial OS=Homo sapiens GN=GATM - [GATM_HUMAN]	GATM	2.8747	2.76777	2.84155	7	8	3
P50454	Serpin H1 OS=Homo sapiens GN=SERPINH1 PE=1 SV=2 - [SERPH_HUMAN]	SERPINH1	1.09661	1.04026	1.11574	27	23	25
P50502	Hsc70-interacting protein OS=Homo sapiens GN=ST13 PE=1 SV=2 - [F10A1_HUMAN]	ST13	1.20629	1.21786	1.16632	20	15	18
P50552	Vasodilator-stimulated phosphoprotein OS=Homo sapiens GN=VASP PE=1 SV=3 - [VASP_HUMAN]	VASP	1.36276	1.2703	1.3086	19	19	18
P50570-4	Isoform 4 of Dynamin-2 OS=Homo sapiens GN=DNM2 - [DYN2_HUMAN]	DNM2	0.750835	1.04131	1.4036	2	2	2
P50570-5	Isoform 5 of Dynamin-2 OS=Homo sapiens GN=DNM2 - [DYN2_HUMAN]	DNM2	1.01063	0.923688	1.02499	6	6	7
P50579-2	Isoform 2 of Methionine aminopeptidase 2 OS=Homo sapiens GN=METAP2 - [MAP2_HUMAN]	METAP2	1.17446	1.21643	1.17385	12	11	9
P50583	Bis(5'-nucleosyl)-tetraphosphatase [asymmetrical] OS=Homo sapiens GN=NUDT2 PE=1 SV=3 - [AP4A_HUMAN]	NUDT2	0.658512	0.786267	0.693508	4	3	2
P50748	Kinetochore-associated protein 1 OS=Homo sapiens GN=KNTC1 PE=1 SV=1 - [KNTC1_HUMAN]	KNTC1	0.841289	0.519565	0.759632	1	1	2
P50750	Cyclin-dependent kinase 9 OS=Homo sapiens GN=CDK9 PE=1 SV=3 - [CDK9_HUMAN]	CDK9	0.87484	0.75703	0.741412	3	3	2
P50851	Lipopolysaccharide-responsive and beige-like anchor protein OS=Homo sapiens GN=LRBA PE=1 SV=4 - [LRBA_HUMAN]	LRBA	1.07369	0.792583	1.088	4	4	7
P50897	Palmitoyl-protein thioesterase 1 OS=Homo sapiens GN=PPT1 PE=1 SV=1 - [PPT1_HUMAN]	PPT1	1.28844	1.3313	0.884026	2	2	3
P50914	60S ribosomal protein L14 OS=Homo sapiens GN=RPL14 PE=1 SV=4 - [RL14_HUMAN]	RPL14	1.0286	1.02969	1.03124	13	15	13
P50990	T-complex protein 1 subunit theta OS=Homo sapiens GN=CCT8 PE=1 SV=4 - [TCPQ_HUMAN]	CCT8	0.998949	1.0164	1.02	43	46	46
P50991	T-complex protein 1 subunit delta OS=Homo sapiens GN=CCT4 PE=1 SV=4 - [TCPD_HUMAN]	CCT4	0.989724	0.961781	0.982979	36	35	36
P50995-2	Isoform 2 of Annexin A11 OS=Homo sapiens GN=ANXA11 - [ANX11_HUMAN]	ANXA11	1.11574	1.11725	1.13503	16	16	19
P51003	Poly(A) polymerase alpha OS=Homo sapiens GN=PAPOLA PE=1 SV=4 - [PAPOA_HUMAN]	PAPOLA		0.747982	1.14565		3	2
P51114	Fragile X mental retardation syndrome-related protein 1 OS=Homo sapiens GN=FXR1 PE=1 SV=3 - [FXR1_HUMAN]	FXR1	0.953222	0.957306	0.862405	18	17	13
P51116	Fragile X mental retardation syndrome-related protein 2 OS=Homo sapiens GN=FXR2 PE=1 SV=2 - [FXR2_HUMAN]	FXR2	0.897577	0.949446	0.887284	6	6	6
P51148	Ras-related protein Rab-5C OS=Homo sapiens GN=RAB5C PE=1 SV=2 - [RAB5C_HUMAN]	RAB5C	0.996044	0.943191	1.04909	9	8	10
P51149	Ras-related protein Rab-7a OS=Homo sapiens GN=RAB7A PE=1 SV=1 - [RAB7A_HUMAN]	RAB7A	1.14933	1.27106	1.18829	20	16	15
P51153	Ras-related protein Rab-13 OS=Homo sapiens GN=RAB13 PE=1 SV=1 - [RAB13_HUMAN]	RAB13	1.09943	1.04535	0.94962	3	2	3
P51159	Ras-related protein Rab-27A OS=Homo sapiens GN=RAB27A PE=1 SV=3 - [RB27A_HUMAN]	RAB27A	0.49706	0.992595		1	1
P51398-2	Isoform 2 of 28S ribosomal protein S29, mitochondrial OS=Homo sapiens GN=DAP3 - [RT29_HUMAN]	DAP3	0.823006	0.828144	0.841349	5	9	5
P51452-2	Isoform 2 of Dual specificity protein phosphatase 3 OS=Homo sapiens GN=DUSP3 - [DUS3_HUMAN]	DUSP3		2.76478	1.23733		1	1
P51532-5	Isoform 5 of Transcription activator BRG1 OS=Homo sapiens GN=SMARCA4 - [SMCA4_HUMAN]	SMARCA4	1.00337	1.293	1.24107	5	6	8
P51553-2	Isoform 2 of Isocitrate dehydrogenase [NAD] subunit gamma, mitochondrial OS=Homo sapiens GN=IDH3G - [IDH3G_HUMAN]	IDH3G	1.21454		1.26206	5		4
P51570	Galactokinase OS=Homo sapiens GN=GALK1 PE=1 SV=1 - [GALK1_HUMAN]	GALK1	0.985889	0.861742	1.01409	5	9	7
P51571	Translocon-associated protein subunit delta OS=Homo sapiens GN=SSR4 PE=1 SV=1 - [SSRD_HUMAN]	SSR4	0.707436	1.37257	0.773584	2	2	3
P51572	B-cell receptor-associated protein 31 OS=Homo sapiens GN=BCAP31 PE=1 SV=3 - [BAP31_HUMAN]	BCAP31	1.06396	1.08223	1.07565	13	12	15
P51606	N-acylglucosamine 2-epimerase OS=Homo sapiens GN=RENBP PE=1 SV=2 - [RENBP_HUMAN]	RENBP	2.63493	2.78362	8.33555	1	3	1
P51608	Methyl-CpG-binding protein 2 OS=Homo sapiens GN=MECP2 PE=1 SV=1 - [MECP2_HUMAN]	MECP2	1.60863	1.37291	1.93889	4	3	3
P51610-2	Isoform 2 of Host cell factor 1 OS=Homo sapiens GN=HCFC1 - [HCFC1_HUMAN]	HCFC1	1.02909	1.13096	0.84215	10	7	9
P51617-4	Isoform 4 of Interleukin-1 receptor-associated kinase 1 OS=Homo sapiens GN=IRAK1 - [IRAK1_HUMAN]	IRAK1	0.58415		0.761505	2		2
P51636	Caveolin-2 OS=Homo sapiens GN=CAV2 PE=1 SV=2 - [CAV2_HUMAN]	CAV2	1.63898		1.62617	7		9
P51648	Fatty aldehyde dehydrogenase OS=Homo sapiens GN=ALDH3A2 PE=1 SV=1 - [AL3A2_HUMAN]	ALDH3A2	1.13658	1.11313	1.16523	20	23	21
P51649	Succinate-semialdehyde dehydrogenase, mitochondrial OS=Homo sapiens GN=ALDH5A1 PE=1 SV=2 - [SSDH_HUMAN]	ALDH5A1	0.985224	0.865506	1.01704	5	6	5
P51659	Peroxisomal multifunctional enzyme type 2 OS=Homo sapiens GN=HSD17B4 PE=1 SV=3 - [DHB4_HUMAN]	HSD17B4	0.929194	0.944978	0.966303	22	21	22
P51665	26S proteasome non-ATPase regulatory subunit 7 OS=Homo sapiens GN=PSMD7 PE=1 SV=2 - [PSMD7_HUMAN]	PSMD7	1.08973	0.974777	1.02224	16	15	18
P51688	N-sulphoglucosamine sulphohydrolase OS=Homo sapiens GN=SGSH PE=1 SV=1 - [SPHM_HUMAN]	SGSH
P51798-2	Isoform 2 of H(+)/Cl(-) exchange transporter 7 OS=Homo sapiens GN=CLCN7 - [CLCN7_HUMAN]	CLCN7	1.65573	1.05489	1.26868	1	1	3
P51808	Dynein light chain Tctex-type 3 OS=Homo sapiens GN=DYNLT3 PE=1 SV=1 - [DYLT3_HUMAN]	DYNLT3		0.913668	0.700416		1	2
P51809	Vesicle-associated membrane protein 7 OS=Homo sapiens GN=VAMP7 PE=1 SV=3 - [VAMP7_HUMAN]	VAMP7			1.04797			4
P51812	Ribosomal protein S6 kinase alpha-3 OS=Homo sapiens GN=RPS6KA3 PE=1 SV=1 - [KS6A3_HUMAN]	RPS6KA3	0.988087	0.852703	0.858499	8	8	12
P51843	Nuclear receptor subfamily 0 group B member 1 OS=Homo sapiens GN=NR0B1 PE=1 SV=2 - [NR0B1_HUMAN]	NR0B1	1.12158	1.09275	1.28353	2	3	3
P51858	Hepatoma-derived growth factor OS=Homo sapiens GN=HDGF PE=1 SV=1 - [HDGF_HUMAN]	HDGF	1.17643	1.18139	1.24263	27	26	22
P51946	Cyclin-H OS=Homo sapiens GN=CCNH PE=1 SV=1 - [CCNH_HUMAN]	CCNH	1.04268		1.29166	1		1
P51948-2	Isoform 2 of CDK-activating kinase assembly factor MAT1 OS=Homo sapiens GN=MNAT1 - [MAT1_HUMAN]	MNAT1	1.15506	1.54695	1.52965	1	1	1
P51970	NADH dehydrogenase [ubiquinone] 1 alpha subcomplex subunit 8 OS=Homo sapiens GN=NDUFA8 PE=1 SV=3 - [NDUA8_HUMAN]	NDUFA8	0.919476	1.11749	1.11079	9	9	11
P51991	Heterogeneous nuclear ribonucleoprotein A3 OS=Homo sapiens GN=HNRNPA3 PE=1 SV=2 - [ROA3_HUMAN]	HNRNPA3	1.14169	1.18421	1.14971	8	7	11
P51991-2	Isoform 2 of Heterogeneous nuclear ribonucleoprotein A3 OS=Homo sapiens GN=HNRNPA3 - [ROA3_HUMAN]	HNRNPA3	1.21175	0.9961	1.07027	3	3	2
P52209-2	Isoform 2 of 6-phosphogluconate dehydrogenase, decarboxylating OS=Homo sapiens GN=PGD - [6PGD_HUMAN]	PGD	0.988055	0.977092	1.00849	56	65	57
P52272-2	Isoform 2 of Heterogeneous nuclear ribonucleoprotein M OS=Homo sapiens GN=HNRNPM - [HNRPM_HUMAN]	HNRNPM	1.02796	1.04403	1.02591	56	56	56
P52292	Importin subunit alpha-1 OS=Homo sapiens GN=KPNA2 PE=1 SV=1 - [IMA1_HUMAN]	KPNA2	1.13342	1.12455	1.12523	13	16	18
P52294	Importin subunit alpha-5 OS=Homo sapiens GN=KPNA1 PE=1 SV=3 - [IMA5_HUMAN]	KPNA1	0.809734	0.876155	0.823079	2	5	6
P52298-3	Isoform 3 of Nuclear cap-binding protein subunit 2 OS=Homo sapiens GN=NCBP2 - [NCBP2_HUMAN]	NCBP2	0.632556	0.431801	0.869448	1	2	1
P52306	Rap1 GTPase-GDP dissociation stimulator 1 OS=Homo sapiens GN=RAP1GDS1 PE=1 SV=3 - [GDS1_HUMAN]	RAP1GDS1	0.667012	0.864195	0.784131	10	7	8
P52434-2	Isoform 2 of DNA-directed RNA polymerases I, II, and III subunit RPABC3 OS=Homo sapiens GN=POLR2H - [RPAB3_HUMAN]	POLR2H	0.986555		0.9835	5		6
P52565	Rho GDP-dissociation inhibitor 1 OS=Homo sapiens GN=ARHGDIA PE=1 SV=3 - [GDIR1_HUMAN]	ARHGDIA	0.903875	0.866303	0.912066	15	14	16
P52566	Rho GDP-dissociation inhibitor 2 OS=Homo sapiens GN=ARHGDIB PE=1 SV=3 - [GDIR2_HUMAN]	ARHGDIB	0.67167	0.603449	0.578879	1	2	3
P52594-2	Isoform 2 of Arf-GAP domain and FG repeat-containing protein 1 OS=Homo sapiens GN=AGFG1 - [AGFG1_HUMAN]	AGFG1	1.18783	0.973837	0.937483	6	4	4
P52597	Heterogeneous nuclear ribonucleoprotein F OS=Homo sapiens GN=HNRNPF PE=1 SV=3 - [HNRPF_HUMAN]	HNRNPF	1.15427	1.15698	1.15072	17	16	15
P52655	Transcription initiation factor IIA subunit 1 OS=Homo sapiens GN=GTF2A1 PE=1 SV=1 - [TF2AA_HUMAN]	GTF2A1	0.991447	0.967128		1	1
P52701	DNA mismatch repair protein Msh6 OS=Homo sapiens GN=MSH6 PE=1 SV=2 - [MSH6_HUMAN]	MSH6	1.0632	0.967388	0.897842	11	15	11
P52732	Kinesin-like protein KIF11 OS=Homo sapiens GN=KIF11 PE=1 SV=2 - [KIF11_HUMAN]	KIF11	1.54615	1.40874	1.46538	3	3	4
P52735-3	Isoform 3 of Guanine nucleotide exchange factor VAV2 OS=Homo sapiens GN=VAV2 - [VAV2_HUMAN]	VAV2	0.945115	0.710105	1.07863	2	3	2
P52758	Ribonuclease UK114 OS=Homo sapiens GN=HRSP12 PE=1 SV=1 - [UK114_HUMAN]	HRSP12	0.925217	0.87987	0.832326	5	5	1
P52788-2	Isoform 2 of Spermine synthase OS=Homo sapiens GN=SMS - [SPSY_HUMAN]	SMS			1.05501			7
P52815	39S ribosomal protein L12, mitochondrial OS=Homo sapiens GN=MRPL12 PE=1 SV=2 - [RM12_HUMAN]	MRPL12	1.21969	1.23319	1.25828	9	7	8
P52888	Thimet oligopeptidase OS=Homo sapiens GN=THOP1 PE=1 SV=2 - [THOP1_HUMAN]	THOP1	0.803242	0.837697	0.925132	8	7	6
P52895	Aldo-keto reductase family 1 member C2 OS=Homo sapiens GN=AKR1C2 PE=1 SV=3 - [AK1C2_HUMAN]	AKR1C2	1.12405	1.12027	1.08001	6	4	5
P52907	F-actin-capping protein subunit alpha-1 OS=Homo sapiens GN=CAPZA1 PE=1 SV=3 - [CAZA1_HUMAN]	CAPZA1	0.954484	0.958693	1.01282	7	9	5
P52926-3	Isoform 3 of High mobility group protein HMGI-C OS=Homo sapiens GN=HMGA2 - [HMGA2_HUMAN]	HMGA2	1.09323	1.47212	1.19436	2	2	3
P52948-6	Isoform 6 of Nuclear pore complex protein Nup98-Nup96 OS=Homo sapiens GN=NUP98 - [NUP98_HUMAN]	NUP98	0.803117	1.15266	1.0001	14	6	13
P53004	Biliverdin reductase A OS=Homo sapiens GN=BLVRA PE=1 SV=2 - [BIEA_HUMAN]	BLVRA	0.881906	0.87332	0.849028	9	6	8
P53007	Tricarboxylate transport protein, mitochondrial OS=Homo sapiens GN=SLC25A1 PE=1 SV=2 - [TXTP_HUMAN]	SLC25A1	1.0992	1.1064	1.10901	14	13	11
P53041	Serine/threonine-protein phosphatase 5 OS=Homo sapiens GN=PPP5C PE=1 SV=1 - [PPP5_HUMAN]	PPP5C	1.03923	1.26577	1.18085	4	1	5
P53350	Serine/threonine-protein kinase PLK1 OS=Homo sapiens GN=PLK1 PE=1 SV=1 - [PLK1_HUMAN]	PLK1	1.25558	1.26239	1.8688	3	2	2
P53365-2	Isoform 2 of Arfaptin-2 OS=Homo sapiens GN=ARFIP2 - [ARFP2_HUMAN]	ARFIP2	0.539813	0.40934	0.280912	1	1	1
P53367	Arfaptin-1 OS=Homo sapiens GN=ARFIP1 PE=1 SV=2 - [ARFP1_HUMAN]	ARFIP1	0.876574	0.95983	0.664467	4	5	1
P53367-2	Isoform A of Arfaptin-1 OS=Homo sapiens GN=ARFIP1 - [ARFP1_HUMAN]	ARFIP1
P53384-2	Isoform 2 of Cytosolic Fe-S cluster assembly factor NUBP1 OS=Homo sapiens GN=NUBP1 - [NUBP1_HUMAN]	NUBP1	0.87827	0.782588	0.972053	2	1	3
P53396	ATP-citrate synthase OS=Homo sapiens GN=ACLY PE=1 SV=3 - [ACLY_HUMAN]	ACLY	0.927481	0.900255	0.879596	48	44	46
P53582	Methionine aminopeptidase 1 OS=Homo sapiens GN=METAP1 PE=1 SV=2 - [MAP11_HUMAN]	METAP1	1.02893	0.960269	1.05721	7	9	5
P53597	Succinyl-CoA ligase [ADP/GDP-forming] subunit alpha, mitochondrial OS=Homo sapiens GN=SUCLG1 PE=1 SV=4 - [SUCA_HUMAN]	SUCLG1	1.14734	1.17742	1.08688	12	10	8
P53602	Diphosphomevalonate decarboxylase OS=Homo sapiens GN=MVD PE=1 SV=1 - [MVD1_HUMAN]	MVD	0.911071	0.855706	1.0271	2	4	1
P53618	Coatomer subunit beta OS=Homo sapiens GN=COPB1 PE=1 SV=3 - [COPB_HUMAN]	COPB1	0.8859	0.87875	0.909291	29	30	34
P53621	Coatomer subunit alpha OS=Homo sapiens GN=COPA PE=1 SV=2 - [COPA_HUMAN]	COPA	0.928826	0.924599	0.932189	50	46	41
P53634	Dipeptidyl peptidase 1 OS=Homo sapiens GN=CTSC PE=1 SV=2 - [CATC_HUMAN]	CTSC	1.17302	1.03535	1.22073	12	10	10
P53680-2	Isoform 2 of AP-2 complex subunit sigma OS=Homo sapiens GN=AP2S1 - [AP2S1_HUMAN]	AP2S1	0.890806	0.876382	1.15758	2	2	1
P53701	Cytochrome c-type heme lyase OS=Homo sapiens GN=HCCS PE=1 SV=1 - [CCHL_HUMAN]	HCCS	0.889969	1.01464	0.823264	5	4	5
P53801	Pituitary tumor-transforming gene 1 protein-interacting protein OS=Homo sapiens GN=PTTG1IP PE=1 SV=1 - [PTTG_HUMAN]	PTTG1IP	1.64573	1.33244	1.82952	1	1	2
P53803	DNA-directed RNA polymerases I, II, and III subunit RPABC4 OS=Homo sapiens GN=POLR2K PE=3 SV=1 - [RPAB4_HUMAN]	POLR2K		0.722816	0.423212		1	1
P53985	Monocarboxylate transporter 1 OS=Homo sapiens GN=SLC16A1 PE=1 SV=3 - [MOT1_HUMAN]	SLC16A1	1.04551	1.38158	1.09553	3	2	3
P53990-2	Isoform 2 of IST1 homolog OS=Homo sapiens GN=IST1 - [IST1_HUMAN]	IST1	0.563109	0.744049	0.812799	2	2	2
P53992	Protein transport protein Sec24C OS=Homo sapiens GN=SEC24C PE=1 SV=3 - [SC24C_HUMAN]	SEC24C	0.89104	0.982096	0.807934	12	11	10
P53999	Activated RNA polymerase II transcriptional coactivator p15 OS=Homo sapiens GN=SUB1 PE=1 SV=3 - [TCP4_HUMAN]	SUB1	1.1462	1.02951	1.09007	7	10	8
P54098	DNA polymerase subunit gamma-1 OS=Homo sapiens GN=POLG PE=1 SV=1 - [DPOG1_HUMAN]	POLG	2.16555	1.0906	1.35283	1	2	2
P54105	Methylosome subunit pICln OS=Homo sapiens GN=CLNS1A PE=1 SV=1 - [ICLN_HUMAN]	CLNS1A			0.696775			1
P54132	Bloom syndrome protein OS=Homo sapiens GN=BLM PE=1 SV=1 - [BLM_HUMAN]	BLM		0.686962	0.98342		1	1
P54136	Arginine--tRNA ligase, cytoplasmic OS=Homo sapiens GN=RARS PE=1 SV=2 - [SYRC_HUMAN]	RARS	0.881938	0.881939	0.877918	21	19	25
P54577	Tyrosine--tRNA ligase, cytoplasmic OS=Homo sapiens GN=YARS PE=1 SV=4 - [SYYC_HUMAN]	YARS	1.09089	1.08711	1.13317	28	32	33
P54578	Ubiquitin carboxyl-terminal hydrolase 14 OS=Homo sapiens GN=USP14 PE=1 SV=3 - [UBP14_HUMAN]	USP14			1.08047			21
P54619-2	Isoform 2 of 5'-AMP-activated protein kinase subunit gamma-1 OS=Homo sapiens GN=PRKAG1 - [AAKG1_HUMAN]	PRKAG1	0.969459	0.916552	1.00368	8	6	9
P54709	Sodium/potassium-transporting ATPase subunit beta-3 OS=Homo sapiens GN=ATP1B3 PE=1 SV=1 - [AT1B3_HUMAN]	ATP1B3		0.898452			2
P54725-2	Isoform 2 of UV excision repair protein RAD23 homolog A OS=Homo sapiens GN=RAD23A - [RD23A_HUMAN]	RAD23A			0.952115			2
P54727	UV excision repair protein RAD23 homolog B OS=Homo sapiens GN=RAD23B PE=1 SV=1 - [RD23B_HUMAN]	RAD23B	0.882336	0.884324	0.932466	15	13	12
P54819-2	Isoform 2 of Adenylate kinase 2, mitochondrial OS=Homo sapiens GN=AK2 - [KAD2_HUMAN]	AK2	1.00419	0.991648	1.0336	24	29	23
P54868-2	Isoform 2 of Hydroxymethylglutaryl-CoA synthase, mitochondrial OS=Homo sapiens GN=HMGCS2 - [HMCS2_HUMAN]	HMGCS2		2.85809	3.9399		2	1
P54886-2	Isoform Short of Delta-1-pyrroline-5-carboxylate synthase OS=Homo sapiens GN=ALDH18A1 - [P5CS_HUMAN]	ALDH18A1	0.764559	0.862747	0.776172	10	9	9
P54920	Alpha-soluble NSF attachment protein OS=Homo sapiens GN=NAPA PE=1 SV=3 - [SNAA_HUMAN]	NAPA	1.46647	1.5786	1.45699	23	18	21
P55010	Eukaryotic translation initiation factor 5 OS=Homo sapiens GN=EIF5 PE=1 SV=2 - [IF5_HUMAN]	EIF5	0.802217	0.796954	0.81066	11	6	6
P55011-3	Isoform 2 of Solute carrier family 12 member 2 OS=Homo sapiens GN=SLC12A2 - [S12A2_HUMAN]	SLC12A2	1.60938	2.47799	1.75009	1	1	1
P55036	26S proteasome non-ATPase regulatory subunit 4 OS=Homo sapiens GN=PSMD4 PE=1 SV=1 - [PSMD4_HUMAN]	PSMD4	0.81245	0.855301	0.786958	11	10	10
P55039	Developmentally-regulated GTP-binding protein 2 OS=Homo sapiens GN=DRG2 PE=1 SV=1 - [DRG2_HUMAN]	DRG2	0.515677	0.5802	0.505032	2	5	1
P55060-3	Isoform 3 of Exportin-2 OS=Homo sapiens GN=CSE1L - [XPO2_HUMAN]	CSE1L	0.963134	0.986369	1.03721	34	36	36
P55061	Bax inhibitor 1 OS=Homo sapiens GN=TMBIM6 PE=1 SV=2 - [BI1_HUMAN]	TMBIM6	1.81173	1.93336	1.77727	4	3	2
P55072	Transitional endoplasmic reticulum ATPase OS=Homo sapiens GN=VCP PE=1 SV=4 - [TERA_HUMAN]	VCP	1.03939	1.00843	1.00184	94	96	98
P55081	Microfibrillar-associated protein 1 OS=Homo sapiens GN=MFAP1 PE=1 SV=2 - [MFAP1_HUMAN]	MFAP1		0.848318			1
P55084-2	Isoform 2 of Trifunctional enzyme subunit beta, mitochondrial OS=Homo sapiens GN=HADHB - [ECHB_HUMAN]	HADHB	1.06924	1.17541	1.11819	28	27	26
P55145	Mesencephalic astrocyte-derived neurotrophic factor OS=Homo sapiens GN=MANF PE=1 SV=3 - [MANF_HUMAN]	MANF	0.931241	1.12431	0.942524	11	8	11
P55157	Microsomal triglyceride transfer protein large subunit OS=Homo sapiens GN=MTTP PE=1 SV=1 - [MTP_HUMAN]	MTTP	0.887472	0.867205	1.0834	2	1	2
P55196-3	Isoform 3 of Afadin OS=Homo sapiens GN=MLLT4 - [AFAD_HUMAN]	MLLT4			1.3148			2
P55209-2	Isoform 2 of Nucleosome assembly protein 1-like 1 OS=Homo sapiens GN=NAP1L1 - [NP1L1_HUMAN]	NAP1L1	0.973466	0.990822	0.963545	12	12	16
P55209-3	Isoform 3 of Nucleosome assembly protein 1-like 1 OS=Homo sapiens GN=NAP1L1 - [NP1L1_HUMAN]	NAP1L1	0.86598	0.939304	0.72008	2	2	2
P55212-2	Isoform Beta of Caspase-6 OS=Homo sapiens GN=CASP6 - [CASP6_HUMAN]	CASP6	0.62343	0.636281	0.699547	1	1	1
P55265-5	Isoform 5 of Double-stranded RNA-specific adenosine deaminase OS=Homo sapiens GN=ADAR - [DSRAD_HUMAN]	ADAR	1.06752		1.04243	2		35
P55317-2	Isoform 2 of Hepatocyte nuclear factor 3-alpha OS=Homo sapiens GN=FOXA1 - [FOXA1_HUMAN]	FOXA1			1.0132			1
P55327-2	Isoform 2 of Tumor protein D52 OS=Homo sapiens GN=TPD52 - [TPD52_HUMAN]	TPD52	1.13375	1.16477	1.10828	18	18	17
P55735	Protein SEC13 homolog OS=Homo sapiens GN=SEC13 PE=1 SV=3 - [SEC13_HUMAN]	SEC13	1.03365	1.03394	1.09089	10	11	11
P55769	NHP2-like protein 1 OS=Homo sapiens GN=NHP2L1 PE=1 SV=3 - [NH2L1_HUMAN]	NHP2L1	0.9351	0.998624	0.985119	11	11	7
P55786	Puromycin-sensitive aminopeptidase OS=Homo sapiens GN=NPEPPS PE=1 SV=2 - [PSA_HUMAN]	NPEPPS	0.946618	0.903737	0.988583	29	31	34
P55789	FAD-linked sulfhydryl oxidase ALR OS=Homo sapiens GN=GFER PE=1 SV=2 - [ALR_HUMAN]	GFER	1.05238	0.895096		1	3
P55795	Heterogeneous nuclear ribonucleoprotein H2 OS=Homo sapiens GN=HNRNPH2 PE=1 SV=1 - [HNRH2_HUMAN]	HNRNPH2	0.854993	0.900188	0.9536	10	12	10
P55884	Eukaryotic translation initiation factor 3 subunit B OS=Homo sapiens GN=EIF3B PE=1 SV=3 - [EIF3B_HUMAN]	EIF3B	0.977418	1.00531	0.973301	30	31	31
P55957	BH3-interacting domain death agonist OS=Homo sapiens GN=BID PE=1 SV=1 - [BID_HUMAN]	BID	0.850221	0.844029	0.855329	6	3	9
P56134-3	Isoform 3 of ATP synthase subunit f, mitochondrial OS=Homo sapiens GN=ATP5J2 - [ATPK_HUMAN]	ATP5J2	1.07993	1.09222	1.05689	4	5	6
P56181-2	Isoform 2 of NADH dehydrogenase [ubiquinone] flavoprotein 3, mitochondrial OS=Homo sapiens GN=NDUFV3 - [NDUV3_HUMAN]	NDUFV3	1.07787	1.49545	0.603627	2	1	1
P56182	Ribosomal RNA processing protein 1 homolog A OS=Homo sapiens GN=RRP1 PE=1 SV=1 - [RRP1_HUMAN]	RRP1	0.955792	0.999678	1.06942	5	4	6
P56192	Methionine--tRNA ligase, cytoplasmic OS=Homo sapiens GN=MARS PE=1 SV=2 - [SYMC_HUMAN]	MARS	0.874326	0.949978	0.959836	16	20	17
P56211-2	Isoform ARPP-16 of cAMP-regulated phosphoprotein 19 OS=Homo sapiens GN=ARPP19 - [ARP19_HUMAN]	ARPP19	0.970291	1.08445	1.07827	3	4	2
P56270-3	Isoform 3 of Myc-associated zinc finger protein OS=Homo sapiens GN=MAZ - [MAZ_HUMAN]	MAZ			1.00739			1
P56378	6.8 kDa mitochondrial proteolipid OS=Homo sapiens GN=MP68 PE=1 SV=1 - [68MP_HUMAN]	MP68	0.790049		0.743406	1		1
P56381	ATP synthase subunit epsilon, mitochondrial OS=Homo sapiens GN=ATP5E PE=1 SV=2 - [ATP5E_HUMAN]	ATP5E	0.697208		0.711856	1		1
P56385	ATP synthase subunit e, mitochondrial OS=Homo sapiens GN=ATP5I PE=1 SV=2 - [ATP5I_HUMAN]	ATP5I	1.055	1.87243	1.33019	1	2	2
P56470	Galectin-4 OS=Homo sapiens GN=LGALS4 PE=1 SV=1 - [LEG4_HUMAN]	LGALS4	1.93877	1.83966	1.86821	35	31	32
P56537	Eukaryotic translation initiation factor 6 OS=Homo sapiens GN=EIF6 PE=1 SV=1 - [IF6_HUMAN]	EIF6	0.979658	1.03768	1.04716	14	14	14
P56545	C-terminal-binding protein 2 OS=Homo sapiens GN=CTBP2 PE=1 SV=1 - [CTBP2_HUMAN]	CTBP2	1.15159		1.0566	1		2
P56589	Peroxisomal biogenesis factor 3 OS=Homo sapiens GN=PEX3 PE=1 SV=1 - [PEX3_HUMAN]	PEX3	0.892358		1.49288	1		1
P56945-4	Isoform 4 of Breast cancer anti-estrogen resistance protein 1 OS=Homo sapiens GN=BCAR1 - [BCAR1_HUMAN]	BCAR1	0.525438	1.5271	0.900056	2	2	3
P57081-2	Isoform 2 of tRNA (guanine-N(7)-)-methyltransferase non-catalytic subunit WDR4 OS=Homo sapiens GN=WDR4 - [WDR4_HUMAN]	WDR4	1.68977	0.688313		1	1
P57088	Transmembrane protein 33 OS=Homo sapiens GN=TMEM33 PE=1 SV=2 - [TMM33_HUMAN]	TMEM33	1.09671	1.02367	1.12669	7	12	10
P57678	Gem-associated protein 4 OS=Homo sapiens GN=GEMIN4 PE=1 SV=2 - [GEMI4_HUMAN]	GEMIN4	0.58679	0.672602	0.823634	2	2	1
P57737-3	Isoform 3 of Coronin-7 OS=Homo sapiens GN=CORO7 - [CORO7_HUMAN]	CORO7	1.01155	1.34535	1.21052	2	2	2
P57740	Nuclear pore complex protein Nup107 OS=Homo sapiens GN=NUP107 PE=1 SV=1 - [NU107_HUMAN]	NUP107	1.00211	0.452069	0.880942	2	2	7
P57764	Gasdermin-D OS=Homo sapiens GN=GSDMD PE=1 SV=1 - [GSDMD_HUMAN]	GSDMD	0.665468	0.717274	0.638769	3	3	1
P57772-2	Isoform 2 of Selenocysteine-specific elongation factor OS=Homo sapiens GN=EEFSEC - [SELB_HUMAN]	EEFSEC
P58107	Epiplakin OS=Homo sapiens GN=EPPK1 PE=1 SV=2 - [EPIPL_HUMAN]	EPPK1	1.30658	1.31531	1.40064	3	10	5
P58546	Myotrophin OS=Homo sapiens GN=MTPN PE=1 SV=2 - [MTPN_HUMAN]	MTPN	1.05671	1.10638	1.12502	7	9	6
P58557	Putative ribonuclease OS=Homo sapiens GN=YBEY PE=1 SV=2 - [YBEY_HUMAN]	YBEY	0.984356	0.9739	0.823027	1	1	2
P59998	Actin-related protein 2/3 complex subunit 4 OS=Homo sapiens GN=ARPC4 PE=1 SV=3 - [ARPC4_HUMAN]	ARPC4	0.937938	0.914683	0.935055	10	10	9
P60033	CD81 antigen OS=Homo sapiens GN=CD81 PE=1 SV=1 - [CD81_HUMAN]	CD81	1.4056	1.85197	1.69601	2	1	1
P60059	Protein transport protein Sec61 subunit gamma OS=Homo sapiens GN=SEC61G PE=1 SV=1 - [SC61G_HUMAN]	SEC61G	0.946708	0.874625	1.03174	1	1	1
P60174-1	Isoform 2 of Triosephosphate isomerase OS=Homo sapiens GN=TPI1 - [TPIS_HUMAN]	TPI1	1.03195	1.03247	1.01747	74	75	76
P60228	Eukaryotic translation initiation factor 3 subunit E OS=Homo sapiens GN=EIF3E PE=1 SV=1 - [EIF3E_HUMAN]	EIF3E	0.974758	0.945968	1.02628	21	17	24
P60468	Protein transport protein Sec61 subunit beta OS=Homo sapiens GN=SEC61B PE=1 SV=2 - [SC61B_HUMAN]	SEC61B	0.988573	0.901097	0.919519	2	2	2
P60510	Serine/threonine-protein phosphatase 4 catalytic subunit OS=Homo sapiens GN=PPP4C PE=1 SV=1 - [PP4C_HUMAN]	PPP4C	1.0562	0.819132	0.798929	1	1	3
P60602-2	Isoform 2 of Reactive oxygen species modulator 1 OS=Homo sapiens GN=ROMO1 - [ROMO1_HUMAN]	ROMO1	0.985533	1.02477	1.04467	2	5	5
P60604-2	Isoform 2 of Ubiquitin-conjugating enzyme E2 G2 OS=Homo sapiens GN=UBE2G2 - [UB2G2_HUMAN]	UBE2G2	1.2489	1.00032	0.804998	2	3	2
P60660-2	Isoform Smooth muscle of Myosin light polypeptide 6 OS=Homo sapiens GN=MYL6 - [MYL6_HUMAN]	MYL6	1.06247		1.0521	24		27
P60709	Actin, cytoplasmic 1 OS=Homo sapiens GN=ACTB PE=1 SV=1 - [ACTB_HUMAN]	ACTB	0.72283	0.960935	1.08061	5	4	5
P60842	Eukaryotic initiation factor 4A-I OS=Homo sapiens GN=EIF4A1 PE=1 SV=1 - [IF4A1_HUMAN]	EIF4A1	1.14258	1.08825	1.15473	33	36	35
P60866	40S ribosomal protein S20 OS=Homo sapiens GN=RPS20 PE=1 SV=1 - [RS20_HUMAN]	RPS20	0.971282	0.987975	1.02642	13	13	14
P60891	Ribose-phosphate pyrophosphokinase 1 OS=Homo sapiens GN=PRPS1 PE=1 SV=2 - [PRPS1_HUMAN]	PRPS1	0.879975	0.797729	0.788331	5	7	7
P60900	Proteasome subunit alpha type-6 OS=Homo sapiens GN=PSMA6 PE=1 SV=1 - [PSA6_HUMAN]	PSMA6	0.94163	0.980143	1.00935	14	16	16
P60903	Protein S100-A10 OS=Homo sapiens GN=S100A10 PE=1 SV=2 - [S10AA_HUMAN]	S100A10	0.913203	0.927815	0.906485	21	19	27
P60953	Cell division control protein 42 homolog OS=Homo sapiens GN=CDC42 PE=1 SV=2 - [CDC42_HUMAN]	CDC42	0.974377	1.01263	1.02166	14	13	13
P60981	Destrin OS=Homo sapiens GN=DSTN PE=1 SV=3 - [DEST_HUMAN]	DSTN	0.955055	0.930095	0.988148	9	14	14
P60983	Glia maturation factor beta OS=Homo sapiens GN=GMFB PE=1 SV=2 - [GMFB_HUMAN]	GMFB	0.975614	0.859033	0.87496	3	5	4
P61009	Signal peptidase complex subunit 3 OS=Homo sapiens GN=SPCS3 PE=1 SV=1 - [SPCS3_HUMAN]	SPCS3	1.28962	1.17363	1.02524	4	3	2
P61011	Signal recognition particle 54 kDa protein OS=Homo sapiens GN=SRP54 PE=1 SV=1 - [SRP54_HUMAN]	SRP54	0.973326	1.02427	1.07864	16	12	12
P61018	Ras-related protein Rab-4B OS=Homo sapiens GN=RAB4B PE=1 SV=1 - [RAB4B_HUMAN]	RAB4B
P61019	Ras-related protein Rab-2A OS=Homo sapiens GN=RAB2A PE=1 SV=1 - [RAB2A_HUMAN]	RAB2A	1.05815	1.13471	1.12899	6	8	14
P61020	Ras-related protein Rab-5B OS=Homo sapiens GN=RAB5B PE=1 SV=1 - [RAB5B_HUMAN]	RAB5B	0.826623	1.5684	1.26587	1	3	2
P61024	Cyclin-dependent kinases regulatory subunit 1 OS=Homo sapiens GN=CKS1B PE=1 SV=1 - [CKS1_HUMAN]	CKS1B	0.861187	0.901629	1.03035	5	6	5
P61026	Ras-related protein Rab-10 OS=Homo sapiens GN=RAB10 PE=1 SV=1 - [RAB10_HUMAN]	RAB10	0.926558	0.967312	0.985367	6	9	7
P61081	NEDD8-conjugating enzyme Ubc12 OS=Homo sapiens GN=UBE2M PE=1 SV=1 - [UBC12_HUMAN]	UBE2M	1.36726	1.16726	1.25213	9	8	7
P61086	Ubiquitin-conjugating enzyme E2 K OS=Homo sapiens GN=UBE2K PE=1 SV=3 - [UBE2K_HUMAN]	UBE2K	0.949125		0.875157	4		5
P61088	Ubiquitin-conjugating enzyme E2 N OS=Homo sapiens GN=UBE2N PE=1 SV=1 - [UBE2N_HUMAN]	UBE2N	1.00592	1.05265	0.981288	19	14	15
P61106	Ras-related protein Rab-14 OS=Homo sapiens GN=RAB14 PE=1 SV=4 - [RAB14_HUMAN]	RAB14	0.958321	0.941299	0.913446	14	16	16
P61158	Actin-related protein 3 OS=Homo sapiens GN=ACTR3 PE=1 SV=3 - [ARP3_HUMAN]	ACTR3	1.00472	1.00407	0.986712	25	25	25
P61160	Actin-related protein 2 OS=Homo sapiens GN=ACTR2 PE=1 SV=1 - [ARP2_HUMAN]	ACTR2	1.04468	1.03003	0.971832	17	15	17
P61163	Alpha-centractin OS=Homo sapiens GN=ACTR1A PE=1 SV=1 - [ACTZ_HUMAN]	ACTR1A	0.843921	0.94075	1.25153	7	8	8
P61201	COP9 signalosome complex subunit 2 OS=Homo sapiens GN=COPS2 PE=1 SV=1 - [CSN2_HUMAN]	COPS2	0.943844	1.0162	0.933624	9	13	11
P61221	ATP-binding cassette sub-family E member 1 OS=Homo sapiens GN=ABCE1 PE=1 SV=1 - [ABCE1_HUMAN]	ABCE1	0.97876	0.820568	0.999312	16	15	19
P61224	Ras-related protein Rap-1b OS=Homo sapiens GN=RAP1B PE=1 SV=1 - [RAP1B_HUMAN]	RAP1B	1.27979	1.17044	1.36186	2	6	7
P61225	Ras-related protein Rap-2b OS=Homo sapiens GN=RAP2B PE=1 SV=1 - [RAP2B_HUMAN]	RAP2B	1.31007	1.5413	1.33832	3	4	2
P61247	40S ribosomal protein S3a OS=Homo sapiens GN=RPS3A PE=1 SV=2 - [RS3A_HUMAN]	RPS3A	1.01348	1.0113	0.991833	27	35	33
P61254	60S ribosomal protein L26 OS=Homo sapiens GN=RPL26 PE=1 SV=1 - [RL26_HUMAN]	RPL26	1.02878	1.04518	1.00845	8	9	10
P61289	Proteasome activator complex subunit 3 OS=Homo sapiens GN=PSME3 PE=1 SV=1 - [PSME3_HUMAN]	PSME3	0.885924	0.890472	0.842115	14	13	13
P61313	60S ribosomal protein L15 OS=Homo sapiens GN=RPL15 PE=1 SV=2 - [RL15_HUMAN]	RPL15	1.02878	1.03907	1.03542	16	18	16
P61326	Protein mago nashi homolog OS=Homo sapiens GN=MAGOH PE=1 SV=1 - [MGN_HUMAN]	MAGOH
P61353	60S ribosomal protein L27 OS=Homo sapiens GN=RPL27 PE=1 SV=2 - [RL27_HUMAN]	RPL27	1.01751	0.999586	1.01277	10	12	12
P61421	V-type proton ATPase subunit d 1 OS=Homo sapiens GN=ATP6V0D1 PE=1 SV=1 - [VA0D1_HUMAN]	ATP6V0D1	1.26796	1.43035	1.38578	7	8	6
P61457	Pterin-4-alpha-carbinolamine dehydratase OS=Homo sapiens GN=PCBD1 PE=1 SV=2 - [PHS_HUMAN]	PCBD1	0.874041	0.920041	0.91615	4	4	3
P61513	60S ribosomal protein L37a OS=Homo sapiens GN=RPL37A PE=1 SV=2 - [RL37A_HUMAN]	RPL37A	1.01592	1.12649	1.28363	2	4	3
P61586	Transforming protein RhoA OS=Homo sapiens GN=RHOA PE=1 SV=1 - [RHOA_HUMAN]	RHOA	0.999988	1.00452	1.02179	2	4	2
P61599	N-alpha-acetyltransferase 20 OS=Homo sapiens GN=NAA20 PE=1 SV=1 - [NAA20_HUMAN]	NAA20	0.860234	0.65677	0.870355	3	2	2
P61604	10 kDa heat shock protein, mitochondrial OS=Homo sapiens GN=HSPE1 PE=1 SV=2 - [CH10_HUMAN]	HSPE1	1.2458	1.25603	1.231	26	28	33
P61619	Protein transport protein Sec61 subunit alpha isoform 1 OS=Homo sapiens GN=SEC61A1 PE=1 SV=2 - [S61A1_HUMAN]	SEC61A1	0.983328	0.8809	0.961374	8	8	4
P61758	Prefoldin subunit 3 OS=Homo sapiens GN=VBP1 PE=1 SV=3 - [PFD3_HUMAN]	VBP1	0.919724	0.876665	0.964069	9	9	11
P61769	Beta-2-microglobulin OS=Homo sapiens GN=B2M PE=1 SV=1 - [B2MG_HUMAN]	B2M	1.5252	1.58113	1.6502	3	1	1
P61803	Dolichyl-diphosphooligosaccharide--protein glycosyltransferase subunit DAD1 OS=Homo sapiens GN=DAD1 PE=1 SV=3 - [DAD1_HUMAN]	DAD1	0.867103	0.907461	0.923591	4	4	4
P61916-2	Isoform 2 of Epididymal secretory protein E1 OS=Homo sapiens GN=NPC2 - [NPC2_HUMAN]	NPC2	1.52226	1.47819	1.48753	4	6	5
P61923	Coatomer subunit zeta-1 OS=Homo sapiens GN=COPZ1 PE=1 SV=1 - [COPZ1_HUMAN]	COPZ1	0.906262	0.912021	0.831512	6	7	5
P61956	Small ubiquitin-related modifier 2 OS=Homo sapiens GN=SUMO2 PE=1 SV=3 - [SUMO2_HUMAN]	SUMO2			1.21916			4
P61960	Ubiquitin-fold modifier 1 OS=Homo sapiens GN=UFM1 PE=1 SV=1 - [UFM1_HUMAN]	UFM1	0.882849	0.882624	0.865659	1	1	1
P61962	DDB1- and CUL4-associated factor 7 OS=Homo sapiens GN=DCAF7 PE=1 SV=1 - [DCAF7_HUMAN]	DCAF7		0.485362	1.044		4	1
P61964	WD repeat-containing protein 5 OS=Homo sapiens GN=WDR5 PE=1 SV=1 - [WDR5_HUMAN]	WDR5	1.01044	0.765568	1.00791	5	4	5
P61966-2	Isoform 2 of AP-1 complex subunit sigma-1A OS=Homo sapiens GN=AP1S1 - [AP1S1_HUMAN]	AP1S1	0.952466	1.02406	0.896961	2	2	1
P61970	Nuclear transport factor 2 OS=Homo sapiens GN=NUTF2 PE=1 SV=1 - [NTF2_HUMAN]	NUTF2	1.02133	0.945904	0.971406	4	5	5
P61978	Heterogeneous nuclear ribonucleoprotein K OS=Homo sapiens GN=HNRNPK PE=1 SV=1 - [HNRPK_HUMAN]	HNRNPK	0.881923	1.30859	1.35704	1	1	1
P61978-3	Isoform 3 of Heterogeneous nuclear ribonucleoprotein K OS=Homo sapiens GN=HNRNPK - [HNRPK_HUMAN]	HNRNPK	1.02858	1.00157	1.07801	2	2	4
P61981	14-3-3 protein gamma OS=Homo sapiens GN=YWHAG PE=1 SV=2 - [1433G_HUMAN]	YWHAG	1.02459	1.02874	1.04008	20	21	18
P62070-2	Isoform 2 of Ras-related protein R-Ras2 OS=Homo sapiens GN=RRAS2 - [RRAS2_HUMAN]	RRAS2			1.18045			5
P62072	Mitochondrial import inner membrane translocase subunit Tim10 OS=Homo sapiens GN=TIMM10 PE=1 SV=1 - [TIM10_HUMAN]	TIMM10	0.881372	0.932298	0.985668	3	2	4
P62081	40S ribosomal protein S7 OS=Homo sapiens GN=RPS7 PE=1 SV=1 - [RS7_HUMAN]	RPS7	1.08944	1.04693	1.06695	16	16	15
P62136	Serine/threonine-protein phosphatase PP1-alpha catalytic subunit OS=Homo sapiens GN=PPP1CA PE=1 SV=1 - [PP1A_HUMAN]	PPP1CA	0.92105	0.895102	0.97628	4	5	3
P62140	Serine/threonine-protein phosphatase PP1-beta catalytic subunit OS=Homo sapiens GN=PPP1CB PE=1 SV=3 - [PP1B_HUMAN]	PPP1CB	1.10662	1.0915	1.03276	6	6	5
P62158	Calmodulin OS=Homo sapiens GN=CALM1 PE=1 SV=2 - [CALM_HUMAN]	CALM1	1.1205	1.05657	1.04722	19	16	18
P62191	26S protease regulatory subunit 4 OS=Homo sapiens GN=PSMC1 PE=1 SV=1 - [PRS4_HUMAN]	PSMC1	0.961342	0.956194	0.941061	18	21	19
P62195-2	Isoform 2 of 26S protease regulatory subunit 8 OS=Homo sapiens GN=PSMC5 - [PRS8_HUMAN]	PSMC5	0.968331	1.04144	0.907125	15	13	20
P62241	40S ribosomal protein S8 OS=Homo sapiens GN=RPS8 PE=1 SV=2 - [RS8_HUMAN]	RPS8	0.999416	1.04121	0.976289	21	19	23
P62244	40S ribosomal protein S15a OS=Homo sapiens GN=RPS15A PE=1 SV=2 - [RS15A_HUMAN]	RPS15A	0.997293	1.00014	0.980659	14	15	17
P62249	40S ribosomal protein S16 OS=Homo sapiens GN=RPS16 PE=1 SV=2 - [RS16_HUMAN]	RPS16	1.03162	0.965659	1.09707	15	14	13
P62253	Ubiquitin-conjugating enzyme E2 G1 OS=Homo sapiens GN=UBE2G1 PE=1 SV=3 - [UB2G1_HUMAN]	UBE2G1	1.70926	0.616873		1	1
P62256-2	Isoform 2 of Ubiquitin-conjugating enzyme E2 H OS=Homo sapiens GN=UBE2H - [UBE2H_HUMAN]	UBE2H	0.891068	1.19192	0.874233	1	1	2
P62258	14-3-3 protein epsilon OS=Homo sapiens GN=YWHAE PE=1 SV=1 - [1433E_HUMAN]	YWHAE	1.07608	1.08601	1.07294	7	37	31
P62263	40S ribosomal protein S14 OS=Homo sapiens GN=RPS14 PE=1 SV=3 - [RS14_HUMAN]	RPS14	1.05302	0.950172	1.05239	11	12	13
P62266	40S ribosomal protein S23 OS=Homo sapiens GN=RPS23 PE=1 SV=3 - [RS23_HUMAN]	RPS23	0.951162	1.04446	1.0627	7	10	6
P62269	40S ribosomal protein S18 OS=Homo sapiens GN=RPS18 PE=1 SV=3 - [RS18_HUMAN]	RPS18	1.005	1.06899	1.05498	21	18	17
P62273	40S ribosomal protein S29 OS=Homo sapiens GN=RPS29 PE=1 SV=2 - [RS29_HUMAN]	RPS29	1.06924	1.00775	1.04218	1	2	4
P62277	40S ribosomal protein S13 OS=Homo sapiens GN=RPS13 PE=1 SV=2 - [RS13_HUMAN]	RPS13	1.0144	0.98464	1.01778	26	27	22
P62280	40S ribosomal protein S11 OS=Homo sapiens GN=RPS11 PE=1 SV=3 - [RS11_HUMAN]	RPS11	0.971106	0.993545	1.0147	22	20	20
P62304	Small nuclear ribonucleoprotein E OS=Homo sapiens GN=SNRPE PE=1 SV=1 - [RUXE_HUMAN]	SNRPE	1.09126	1.06603	1.05074	5	6	4
P62306	Small nuclear ribonucleoprotein F OS=Homo sapiens GN=SNRPF PE=1 SV=1 - [RUXF_HUMAN]	SNRPF	0.929706	1.08174	1.00001	1	1	1
P62310	U6 snRNA-associated Sm-like protein LSm3 OS=Homo sapiens GN=LSM3 PE=1 SV=2 - [LSM3_HUMAN]	LSM3	0.698462	0.857956	0.905191	1	1	3
P62314	Small nuclear ribonucleoprotein Sm D1 OS=Homo sapiens GN=SNRPD1 PE=1 SV=1 - [SMD1_HUMAN]	SNRPD1	1.01908	1.02172	1.01201	7	8	7
P62316	Small nuclear ribonucleoprotein Sm D2 OS=Homo sapiens GN=SNRPD2 PE=1 SV=1 - [SMD2_HUMAN]	SNRPD2	0.909199	0.933716	0.905875	11	9	8
P62318-2	Isoform 2 of Small nuclear ribonucleoprotein Sm D3 OS=Homo sapiens GN=SNRPD3 - [SMD3_HUMAN]	SNRPD3	1.04242	1.09569	1.06877	11	11	8
P62328	Thymosin beta-4 OS=Homo sapiens GN=TMSB4X PE=1 SV=2 - [TYB4_HUMAN]	TMSB4X	1.23333	1.24844	1.24053	8	8	9
P62330	ADP-ribosylation factor 6 OS=Homo sapiens GN=ARF6 PE=1 SV=2 - [ARF6_HUMAN]	ARF6	0.969819	0.89664	0.861783	4	6	4
P62333	26S protease regulatory subunit 10B OS=Homo sapiens GN=PSMC6 PE=1 SV=1 - [PRS10_HUMAN]	PSMC6	1.00003	0.994176	0.983235	13	17	19
P62424	60S ribosomal protein L7a OS=Homo sapiens GN=RPL7A PE=1 SV=2 - [RL7A_HUMAN]	RPL7A	1.05003	1.03357	1.03135	35	33	34
P62487	DNA-directed RNA polymerase II subunit RPB7 OS=Homo sapiens GN=POLR2G PE=1 SV=1 - [RPB7_HUMAN]	POLR2G		0.72916			1
P62495-2	Isoform 2 of Eukaryotic peptide chain release factor subunit 1 OS=Homo sapiens GN=ETF1 - [ERF1_HUMAN]	ETF1	1.13951	1.17518	1.18931	11	11	12
P62633-2	Isoform 2 of Cellular nucleic acid-binding protein OS=Homo sapiens GN=CNBP - [CNBP_HUMAN]	CNBP	1.03044	1.0911	1.04859	7	7	5
P62701	40S ribosomal protein S4, X isoform OS=Homo sapiens GN=RPS4X PE=1 SV=2 - [RS4X_HUMAN]	RPS4X	1.02441	1.00846	0.987891	43	47	51
P62714	Serine/threonine-protein phosphatase 2A catalytic subunit beta isoform OS=Homo sapiens GN=PPP2CB PE=1 SV=1 - [PP2AB_HUMAN]	PPP2CB	0.88341	1.19638	1.05674	1	1	1
P62750	60S ribosomal protein L23a OS=Homo sapiens GN=RPL23A PE=1 SV=1 - [RL23A_HUMAN]	RPL23A	1.0752	1.11142	1.11	9	9	9
P62753	40S ribosomal protein S6 OS=Homo sapiens GN=RPS6 PE=1 SV=1 - [RS6_HUMAN]	RPS6	0.969478	0.94386	0.992275	14	12	15
P62760	Visinin-like protein 1 OS=Homo sapiens GN=VSNL1 PE=1 SV=2 - [VISL1_HUMAN]	VSNL1	0.672717			1
P62805	Histone H4 OS=Homo sapiens GN=HIST1H4A PE=1 SV=2 - [H4_HUMAN]	HIST1H4A	1.09948	1.08603	1.08972	52	48	54
P62820	Ras-related protein Rab-1A OS=Homo sapiens GN=RAB1A PE=1 SV=3 - [RAB1A_HUMAN]	RAB1A	0.915553	0.938757	0.954087	3	4	4
P62826	GTP-binding nuclear protein Ran OS=Homo sapiens GN=RAN PE=1 SV=3 - [RAN_HUMAN]	RAN	1.10959	1.08617	1.0736	24	24	19
P62829	60S ribosomal protein L23 OS=Homo sapiens GN=RPL23 PE=1 SV=1 - [RL23_HUMAN]	RPL23	1.00638	0.956987	1.06562	13	16	13
P62834	Ras-related protein Rap-1A OS=Homo sapiens GN=RAP1A PE=1 SV=1 - [RAP1A_HUMAN]	RAP1A	1.24505	1.37452	1.2334	2	1	1
P62837-2	Isoform 2 of Ubiquitin-conjugating enzyme E2 D2 OS=Homo sapiens GN=UBE2D2 - [UB2D2_HUMAN]	UBE2D2	1.05203	1.11488	1.10912	5	3	4
P62841	40S ribosomal protein S15 OS=Homo sapiens GN=RPS15 PE=1 SV=2 - [RS15_HUMAN]	RPS15	1.00801	1.04695	0.964032	6	7	5
P62847-2	Isoform 2 of 40S ribosomal protein S24 OS=Homo sapiens GN=RPS24 - [RS24_HUMAN]	RPS24	1.02814	1.0824	1.04956	9	15	12
P62851	40S ribosomal protein S25 OS=Homo sapiens GN=RPS25 PE=1 SV=1 - [RS25_HUMAN]	RPS25	1.00204	1.03781	0.987291	11	8	11
P62854	40S ribosomal protein S26 OS=Homo sapiens GN=RPS26 PE=1 SV=3 - [RS26_HUMAN]	RPS26	1.10218	1.02181	1.01564	14	14	15
P62857	40S ribosomal protein S28 OS=Homo sapiens GN=RPS28 PE=1 SV=1 - [RS28_HUMAN]	RPS28	0.942525	0.835357	1.03737	5	5	4
P62861	40S ribosomal protein S30 OS=Homo sapiens GN=FAU PE=1 SV=1 - [RS30_HUMAN]	FAU	1.00441	1.02324	0.941324	6	7	6
P62873	Guanine nucleotide-binding protein G(I)/G(S)/G(T) subunit beta-1 OS=Homo sapiens GN=GNB1 PE=1 SV=3 - [GBB1_HUMAN]	GNB1	1.13754	1.14732	0.9941	6	8	8
P62875	DNA-directed RNA polymerases I, II, and III subunit RPABC5 OS=Homo sapiens GN=POLR2L PE=1 SV=1 - [RPAB5_HUMAN]	POLR2L	0.839584	0.905737	0.852357	3	3	3
P62877	E3 ubiquitin-protein ligase RBX1 OS=Homo sapiens GN=RBX1 PE=1 SV=1 - [RBX1_HUMAN]	RBX1	0.875791	1.05844	0.94986	4	3	3
P62879	Guanine nucleotide-binding protein G(I)/G(S)/G(T) subunit beta-2 OS=Homo sapiens GN=GNB2 PE=1 SV=3 - [GBB2_HUMAN]	GNB2	1.09594	1.1442	1.1908	15	12	14
P62888	60S ribosomal protein L30 OS=Homo sapiens GN=RPL30 PE=1 SV=2 - [RL30_HUMAN]	RPL30	1.01322	0.969533	0.992199	18	17	17
P62891	60S ribosomal protein L39 OS=Homo sapiens GN=RPL39 PE=1 SV=2 - [RL39_HUMAN]	RPL39	1.06098	1.05252	1.03397	6	7	8
P62899-3	Isoform 3 of 60S ribosomal protein L31 OS=Homo sapiens GN=RPL31 - [RL31_HUMAN]	RPL31	0.969779	0.982794	1.01406	7	7	8
P62906	60S ribosomal protein L10a OS=Homo sapiens GN=RPL10A PE=1 SV=2 - [RL10A_HUMAN]	RPL10A	0.985608	1.08195	1.04826	26	23	27
P62910	60S ribosomal protein L32 OS=Homo sapiens GN=RPL32 PE=1 SV=2 - [RL32_HUMAN]	RPL32	1.04805	0.939575	1.01276	14	12	12
P62913-2	Isoform 2 of 60S ribosomal protein L11 OS=Homo sapiens GN=RPL11 - [RL11_HUMAN]	RPL11	1.08574	1.05975	1.03816	5	7	6
P62917	60S ribosomal protein L8 OS=Homo sapiens GN=RPL8 PE=1 SV=2 - [RL8_HUMAN]	RPL8	1.04211	1.04086	1.03896	20	20	20
P62937	Peptidyl-prolyl cis-trans isomerase A OS=Homo sapiens GN=PPIA PE=1 SV=2 - [PPIA_HUMAN]	PPIA	0.918644	0.927316	0.92108	63	60	57
P62942	Peptidyl-prolyl cis-trans isomerase FKBP1A OS=Homo sapiens GN=FKBP1A PE=1 SV=2 - [FKB1A_HUMAN]	FKBP1A	0.984399	0.898221	0.905199	10	12	15
P62979	Ubiquitin-40S ribosomal protein S27a OS=Homo sapiens GN=RPS27A PE=1 SV=2 - [RS27A_HUMAN]	RPS27A	1.06353	1.04812	1.02744	22	22	5
P62987	Ubiquitin-60S ribosomal protein L40 OS=Homo sapiens GN=UBA52 PE=1 SV=2 - [RL40_HUMAN]	UBA52			1.02443			1
P62993	Growth factor receptor-bound protein 2 OS=Homo sapiens GN=GRB2 PE=1 SV=1 - [GRB2_HUMAN]	GRB2	1.008	0.953129	0.965711	17	11	13
P62995-3	Isoform 3 of Transformer-2 protein homolog beta OS=Homo sapiens GN=TRA2B - [TRA2B_HUMAN]	TRA2B	1.08562	1.17857	1.13244	8	8	11
P63000	Ras-related C3 botulinum toxin substrate 1 OS=Homo sapiens GN=RAC1 PE=1 SV=1 - [RAC1_HUMAN]	RAC1	0.935394	0.963953	0.943699	11	10	11
P63010	AP-2 complex subunit beta OS=Homo sapiens GN=AP2B1 PE=1 SV=1 - [AP2B1_HUMAN]	AP2B1	1.09847	0.844534	0.932266	8	5	8
P63027	Vesicle-associated membrane protein 2 OS=Homo sapiens GN=VAMP2 PE=1 SV=3 - [VAMP2_HUMAN]	VAMP2			0.944081			1
P63092-3	Isoform 3 of Guanine nucleotide-binding protein G(s) subunit alpha isoforms short OS=Homo sapiens GN=GNAS - [GNAS2_HUMAN]	GNAS	1.16754	1.09495	1.09029	5	2	3
P63096	Guanine nucleotide-binding protein G(i) subunit alpha-1 OS=Homo sapiens GN=GNAI1 PE=1 SV=2 - [GNAI1_HUMAN]	GNAI1	1.342	1.4831	1.31039	3	1	3
P63098	Calcineurin subunit B type 1 OS=Homo sapiens GN=PPP3R1 PE=1 SV=2 - [CANB1_HUMAN]	PPP3R1	0.945112	0.981595	0.887982	3	3	3
P63104	14-3-3 protein zeta/delta OS=Homo sapiens GN=YWHAZ PE=1 SV=1 - [1433Z_HUMAN]	YWHAZ	1.18564	1.20432	1.19732	32	35	33
P63151	Serine/threonine-protein phosphatase 2A 55 kDa regulatory subunit B alpha isoform OS=Homo sapiens GN=PPP2R2A PE=1 SV=1 - [2ABA_HUMAN]	PPP2R2A	0.929284	0.967445	0.994228	5	6	8
P63165	Small ubiquitin-related modifier 1 OS=Homo sapiens GN=SUMO1 PE=1 SV=1 - [SUMO1_HUMAN]	SUMO1	1.22913	1.17906	1.2566	2	3	3
P63167	Dynein light chain 1, cytoplasmic OS=Homo sapiens GN=DYNLL1 PE=1 SV=1 - [DYL1_HUMAN]	DYNLL1	1.02831	1.16846	1.17628	3	3	3
P63172	Dynein light chain Tctex-type 1 OS=Homo sapiens GN=DYNLT1 PE=1 SV=1 - [DYLT1_HUMAN]	DYNLT1	1.04639	0.998702	1.03861	4	7	7
P63173	60S ribosomal protein L38 OS=Homo sapiens GN=RPL38 PE=1 SV=2 - [RL38_HUMAN]	RPL38	0.901717	0.957009	1.10332	7	7	8
P63208-2	Isoform 2 of S-phase kinase-associated protein 1 OS=Homo sapiens GN=SKP1 - [SKP1_HUMAN]	SKP1	0.868595	0.806692	1.03346	2	3	2
P63218	Guanine nucleotide-binding protein G(I)/G(S)/G(O) subunit gamma-5 OS=Homo sapiens GN=GNG5 PE=1 SV=3 - [GBG5_HUMAN]	GNG5	0.98374		0.747208	2		1
P63220	40S ribosomal protein S21 OS=Homo sapiens GN=RPS21 PE=1 SV=1 - [RS21_HUMAN]	RPS21	0.921879	1.00818	1.01265	13	12	13
P63241	Eukaryotic translation initiation factor 5A-1 OS=Homo sapiens GN=EIF5A PE=1 SV=2 - [IF5A1_HUMAN]	EIF5A	0.912923	0.888468	0.905988	43	44	49
P63244	Guanine nucleotide-binding protein subunit beta-2-like 1 OS=Homo sapiens GN=GNB2L1 PE=1 SV=3 - [GBLP_HUMAN]	GNB2L1	1.02905	1.03869	1.04229	34	42	40
P63261	Actin, cytoplasmic 2 OS=Homo sapiens GN=ACTG1 PE=1 SV=1 - [ACTG_HUMAN]	ACTG1	1.1055	1.10134	1.12668	5	5	7
P63272	Transcription elongation factor SPT4 OS=Homo sapiens GN=SUPT4H1 PE=1 SV=1 - [SPT4H_HUMAN]	SUPT4H1		1.62692			1
P63279	SUMO-conjugating enzyme UBC9 OS=Homo sapiens GN=UBE2I PE=1 SV=1 - [UBC9_HUMAN]	UBE2I	1.25157	1.11249	1.10979	12	12	13
P63313	Thymosin beta-10 OS=Homo sapiens GN=TMSB10 PE=1 SV=2 - [TYB10_HUMAN]	TMSB10	0.817837	0.816024	0.757222	10	5	6
P67775	Serine/threonine-protein phosphatase 2A catalytic subunit alpha isoform OS=Homo sapiens GN=PPP2CA PE=1 SV=1 - [PP2AA_HUMAN]	PPP2CA	1.15448	0.981189	1.12267	1	1	1
P67809	Nuclease-sensitive element-binding protein 1 OS=Homo sapiens GN=YBX1 PE=1 SV=3 - [YBOX1_HUMAN]	YBX1	0.95876	0.954251	0.992607	14	12	15
P67812-4	Isoform 4 of Signal peptidase complex catalytic subunit SEC11A OS=Homo sapiens GN=SEC11A - [SC11A_HUMAN]	SEC11A	0.87664	0.981612	0.954684	7	8	9
P67870	Casein kinase II subunit beta OS=Homo sapiens GN=CSNK2B PE=1 SV=1 - [CSK2B_HUMAN]	CSNK2B	1.02209	1.05709	1.04579	5	8	6
P67936	Tropomyosin alpha-4 chain OS=Homo sapiens GN=TPM4 PE=1 SV=3 - [TPM4_HUMAN]	TPM4	1.03717	1.07622	1.01252	7	6	7
P68032	Actin, alpha cardiac muscle 1 OS=Homo sapiens GN=ACTC1 PE=1 SV=1 - [ACTC_HUMAN]	ACTC1	1.09877	0.964337	1.07598	17	13	16
P68036	Ubiquitin-conjugating enzyme E2 L3 OS=Homo sapiens GN=UBE2L3 PE=1 SV=1 - [UB2L3_HUMAN]	UBE2L3			1.08023			10
P68104	Elongation factor 1-alpha 1 OS=Homo sapiens GN=EEF1A1 PE=1 SV=1 - [EF1A1_HUMAN]	EEF1A1	0.956815	0.972583	0.966432	60	61	70
P68366-2	Isoform 2 of Tubulin alpha-4A chain OS=Homo sapiens GN=TUBA4A - [TBA4A_HUMAN]	TUBA4A	0.992014	0.914029	0.858547	19	17	18
P68371	Tubulin beta-4B chain OS=Homo sapiens GN=TUBB4B PE=1 SV=1 - [TBB4B_HUMAN]	TUBB4B	0.955936	0.901465	1.04787	4	3	3
P68400	Casein kinase II subunit alpha OS=Homo sapiens GN=CSNK2A1 PE=1 SV=1 - [CSK21_HUMAN]	CSNK2A1	0.935856	1.04305	0.948186	18	14	14
P68402	Platelet-activating factor acetylhydrolase IB subunit beta OS=Homo sapiens GN=PAFAH1B2 PE=1 SV=1 - [PA1B2_HUMAN]	PAFAH1B2	0.987255	0.97107	0.897204	7	7	6
P68431	Histone H3.1 OS=Homo sapiens GN=HIST1H3A PE=1 SV=2 - [H31_HUMAN]	HIST1H3A	1.48846	1.52328	1.4791	2	2	2
P69849	Nodal modulator 3 OS=Homo sapiens GN=NOMO3 PE=3 SV=2 - [NOMO3_HUMAN]	NOMO3	1.00483	0.855149	0.938731	10	16	10
P69905	Hemoglobin subunit alpha OS=Homo sapiens GN=HBA1 PE=1 SV=2 - [HBA_HUMAN]	HBA1
P78316	Nucleolar protein 14 OS=Homo sapiens GN=NOP14 PE=1 SV=3 - [NOP14_HUMAN]	NOP14	0.894663		1.14818	4		1
P78318	Immunoglobulin-binding protein 1 OS=Homo sapiens GN=IGBP1 PE=1 SV=1 - [IGBP1_HUMAN]	IGBP1	1.13517	1.14031	1.12143	9	9	8
P78330	Phosphoserine phosphatase OS=Homo sapiens GN=PSPH PE=1 SV=2 - [SERB_HUMAN]	PSPH	0.856903	0.77999	0.929824	6	7	7
P78344	Eukaryotic translation initiation factor 4 gamma 2 OS=Homo sapiens GN=EIF4G2 PE=1 SV=1 - [IF4G2_HUMAN]	EIF4G2	1.03301	1.08454	1.10751	17	17	17
P78345	Ribonuclease P protein subunit p38 OS=Homo sapiens GN=RPP38 PE=1 SV=2 - [RPP38_HUMAN]	RPP38	1.24133	1.34669	1.089	1	2	1
P78346	Ribonuclease P protein subunit p30 OS=Homo sapiens GN=RPP30 PE=1 SV=1 - [RPP30_HUMAN]	RPP30	0.599378	0.800464	0.817979	3	3	3
P78347-2	Isoform 2 of General transcription factor II-I OS=Homo sapiens GN=GTF2I - [GTF2I_HUMAN]	GTF2I	0.728947	0.694873	0.752021	24	24	23
P78362	SRSF protein kinase 2 OS=Homo sapiens GN=SRPK2 PE=1 SV=3 - [SRPK2_HUMAN]	SRPK2	1.11459	1.22557	1.03083	7	7	7
P78371	T-complex protein 1 subunit beta OS=Homo sapiens GN=CCT2 PE=1 SV=4 - [TCPB_HUMAN]	CCT2	1.00378	1.01085	0.985828	66	67	69
P78406	mRNA export factor OS=Homo sapiens GN=RAE1 PE=1 SV=1 - [RAE1L_HUMAN]	RAE1	0.921769	1.04773	0.92471	5	7	5
P78417	Glutathione S-transferase omega-1 OS=Homo sapiens GN=GSTO1 PE=1 SV=2 - [GSTO1_HUMAN]	GSTO1	0.894524	0.806225	1.00416	12	12	12
P78527	DNA-dependent protein kinase catalytic subunit OS=Homo sapiens GN=PRKDC PE=1 SV=3 - [PRKDC_HUMAN]	PRKDC	1.05358	1.06552	1.04336	195	205	199
P78560-2	Isoform 2 of Death domain-containing protein CRADD OS=Homo sapiens GN=CRADD - [CRADD_HUMAN]	CRADD	2.2884		1.35426	1		1
P80188	Neutrophil gelatinase-associated lipocalin OS=Homo sapiens GN=LCN2 PE=1 SV=2 - [NGAL_HUMAN]	LCN2	1.06964	1.20097	1.02976	2	1	4
P80217	Interferon-induced 35 kDa protein OS=Homo sapiens GN=IFI35 PE=1 SV=5 - [IN35_HUMAN]	IFI35	0.877013	0.785227	0.926498	11	8	10
P80303	Nucleobindin-2 OS=Homo sapiens GN=NUCB2 PE=1 SV=2 - [NUCB2_HUMAN]	NUCB2	1.14379	1.01735	1.14621	3	5	3
P82094	TATA element modulatory factor OS=Homo sapiens GN=TMF1 PE=1 SV=2 - [TMF1_HUMAN]	TMF1	1.12159	1.21874	1.37007	1	1	2
P82650	28S ribosomal protein S22, mitochondrial OS=Homo sapiens GN=MRPS22 PE=1 SV=1 - [RT22_HUMAN]	MRPS22	1.27751	1.04435	1.36196	2	4	4
P82663	28S ribosomal protein S25, mitochondrial OS=Homo sapiens GN=MRPS25 PE=1 SV=1 - [RT25_HUMAN]	MRPS25	0.957301	1.19516	1.23025	3	3	4
P82664	28S ribosomal protein S10, mitochondrial OS=Homo sapiens GN=MRPS10 PE=1 SV=2 - [RT10_HUMAN]	MRPS10		2.24008	1.65692		1	1
P82673	28S ribosomal protein S35, mitochondrial OS=Homo sapiens GN=MRPS35 PE=1 SV=1 - [RT35_HUMAN]	MRPS35	1.27928	1.10489	0.974308	2	3	3
P82675	28S ribosomal protein S5, mitochondrial OS=Homo sapiens GN=MRPS5 PE=1 SV=2 - [RT05_HUMAN]	MRPS5	0.955862	0.902887	1.15696	4	2	2
P82909	28S ribosomal protein S36, mitochondrial OS=Homo sapiens GN=MRPS36 PE=1 SV=2 - [RT36_HUMAN]	MRPS36		1.03417	0.763449		1	4
P82912-2	Isoform 2 of 28S ribosomal protein S11, mitochondrial OS=Homo sapiens GN=MRPS11 - [RT11_HUMAN]	MRPS11	1.15368		0.959576	1		1
P82914	28S ribosomal protein S15, mitochondrial OS=Homo sapiens GN=MRPS15 PE=1 SV=1 - [RT15_HUMAN]	MRPS15	1.25566	0.800569	0.91293	1	1	1
P82921	28S ribosomal protein S21, mitochondrial OS=Homo sapiens GN=MRPS21 PE=1 SV=2 - [RT21_HUMAN]	MRPS21	1.17335	1.29939	1.17871	1	1	1
P82930	28S ribosomal protein S34, mitochondrial OS=Homo sapiens GN=MRPS34 PE=1 SV=2 - [RT34_HUMAN]	MRPS34	1.08178	1.13049	1.12433	7	3	8
P82932	28S ribosomal protein S6, mitochondrial OS=Homo sapiens GN=MRPS6 PE=1 SV=3 - [RT06_HUMAN]	MRPS6	1.15533	0.993016	0.648788	2	4	2
P82933	28S ribosomal protein S9, mitochondrial OS=Homo sapiens GN=MRPS9 PE=1 SV=2 - [RT09_HUMAN]	MRPS9	1.12659	1.03444	1.06903	5	6	7
P82979	SAP domain-containing ribonucleoprotein OS=Homo sapiens GN=SARNP PE=1 SV=3 - [SARNP_HUMAN]	SARNP	0.982416	1.04788	0.96546	8	6	8
P83111	Serine beta-lactamase-like protein LACTB, mitochondrial OS=Homo sapiens GN=LACTB PE=1 SV=2 - [LACTB_HUMAN]	LACTB	1.36186	1.34242	1.29349	9	8	9
P83436	Conserved oligomeric Golgi complex subunit 7 OS=Homo sapiens GN=COG7 PE=1 SV=1 - [COG7_HUMAN]	COG7	1.15342	0.876395	0.917014	2	3	3
P83731	60S ribosomal protein L24 OS=Homo sapiens GN=RPL24 PE=1 SV=1 - [RL24_HUMAN]	RPL24	1.02122	0.923482	1.05651	11	13	11
P83876	Thioredoxin-like protein 4A OS=Homo sapiens GN=TXNL4A PE=1 SV=1 - [TXN4A_HUMAN]	TXNL4A	0.878122	0.993169	1.35039	1	1	1
P83881	60S ribosomal protein L36a OS=Homo sapiens GN=RPL36A PE=1 SV=2 - [RL36A_HUMAN]	RPL36A	1.10849	1.08867	1.23088	2	2	2
P84022	Mothers against decapentaplegic homolog 3 OS=Homo sapiens GN=SMAD3 PE=1 SV=1 - [SMAD3_HUMAN]	SMAD3	0.766209	0.586123	0.721651	4	4	2
P84077	ADP-ribosylation factor 1 OS=Homo sapiens GN=ARF1 PE=1 SV=2 - [ARF1_HUMAN]	ARF1			0.944447			9
P84085	ADP-ribosylation factor 5 OS=Homo sapiens GN=ARF5 PE=1 SV=2 - [ARF5_HUMAN]	ARF5		0.890978	0.940186		1	1
P84090	Enhancer of rudimentary homolog OS=Homo sapiens GN=ERH PE=1 SV=1 - [ERH_HUMAN]	ERH	1.13007	1.18517	1.11388	6	9	9
P84095	Rho-related GTP-binding protein RhoG OS=Homo sapiens GN=RHOG PE=1 SV=1 - [RHOG_HUMAN]	RHOG	1.12506	1.15257	1.02029	9	10	7
P84098	60S ribosomal protein L19 OS=Homo sapiens GN=RPL19 PE=1 SV=1 - [RL19_HUMAN]	RPL19	1.05669	1.06937	1.03843	10	11	12
P84103-2	Isoform 2 of Serine/arginine-rich splicing factor 3 OS=Homo sapiens GN=SRSF3 - [SRSF3_HUMAN]	SRSF3	1.017	1.16238	1.08167	8	6	6
P84243	Histone H3.3 OS=Homo sapiens GN=H3F3A PE=1 SV=2 - [H33_HUMAN]	H3F3A	1.38325	1.38669	1.13522	3	3	2
P98082-2	Isoform 2 of Disabled homolog 2 OS=Homo sapiens GN=DAB2 - [DAB2_HUMAN]	DAB2	0.538549			2
P98170	E3 ubiquitin-protein ligase XIAP OS=Homo sapiens GN=XIAP PE=1 SV=2 - [XIAP_HUMAN]	XIAP	0.924524	1.66816	0.635336	2	2	7
P98172	Ephrin-B1 OS=Homo sapiens GN=EFNB1 PE=1 SV=1 - [EFNB1_HUMAN]	EFNB1	1.37543	1.72645		1	1
P98175-2	Isoform 2 of RNA-binding protein 10 OS=Homo sapiens GN=RBM10 - [RBM10_HUMAN]	RBM10	0.702587	0.833752	1.01452	8	5	8
P98179	RNA-binding protein 3 OS=Homo sapiens GN=RBM3 PE=1 SV=1 - [RBM3_HUMAN]	RBM3	0.918517	0.814009	0.809139	5	4	8
P98194-2	Isoform 2 of Calcium-transporting ATPase type 2C member 1 OS=Homo sapiens GN=ATP2C1 - [AT2C1_HUMAN]	ATP2C1	0.775277	0.930821	0.873168	4	3	3
P99999	Cytochrome c OS=Homo sapiens GN=CYCS PE=1 SV=2 - [CYC_HUMAN]	CYCS	0.716201	0.71647	0.78377	8	6	5
Q00059	Transcription factor A, mitochondrial OS=Homo sapiens GN=TFAM PE=1 SV=1 - [TFAM_HUMAN]	TFAM	1.18437		1.40902	7		6
Q00169	Phosphatidylinositol transfer protein alpha isoform OS=Homo sapiens GN=PITPNA PE=1 SV=2 - [PIPNA_HUMAN]	PITPNA	1.11677	1.07235	1.14061	3	3	4
Q00325-2	Isoform B of Phosphate carrier protein, mitochondrial OS=Homo sapiens GN=SLC25A3 - [MPCP_HUMAN]	SLC25A3	1.08829	1.09759	1.14765	30	28	20
Q00341	Vigilin OS=Homo sapiens GN=HDLBP PE=1 SV=2 - [VIGLN_HUMAN]	HDLBP	1.00072	0.962521	1.03087	23	23	25
Q00535-2	Isoform 2 of Cyclin-dependent-like kinase 5 OS=Homo sapiens GN=CDK5 - [CDK5_HUMAN]	CDK5	0.877124	0.879937	0.793148	3	3	2
Q00536	Cyclin-dependent kinase 16 OS=Homo sapiens GN=CDK16 PE=1 SV=1 - [CDK16_HUMAN]	CDK16
Q00537	Cyclin-dependent kinase 17 OS=Homo sapiens GN=CDK17 PE=1 SV=2 - [CDK17_HUMAN]	CDK17	0.759553	0.947929	0.852468	3	4	1
Q00577	Transcriptional activator protein Pur-alpha OS=Homo sapiens GN=PURA PE=1 SV=2 - [PURA_HUMAN]	PURA		1.78362	0.513736		1	1
Q00610-2	Isoform 2 of Clathrin heavy chain 1 OS=Homo sapiens GN=CLTC - [CLH1_HUMAN]	CLTC	1.01001	1.01484	1.00117	138	139	136
Q00613-2	Isoform Short of Heat shock factor protein 1 OS=Homo sapiens GN=HSF1 - [HSF1_HUMAN]	HSF1	0.974609	0.820992	1.19478	1	2	2
Q00653-4	Isoform 4 of Nuclear factor NF-kappa-B p100 subunit OS=Homo sapiens GN=NFKB2 - [NFKB2_HUMAN]	NFKB2			0.880184			1
Q00688	Peptidyl-prolyl cis-trans isomerase FKBP3 OS=Homo sapiens GN=FKBP3 PE=1 SV=1 - [FKBP3_HUMAN]	FKBP3	1.00271	1.08048	0.945515	8	7	9
Q00765-2	Isoform 2 of Receptor expression-enhancing protein 5 OS=Homo sapiens GN=REEP5 - [REEP5_HUMAN]	REEP5	1.03733		0.932351	1		1
Q00796	Sorbitol dehydrogenase OS=Homo sapiens GN=SORD PE=1 SV=4 - [DHSO_HUMAN]	SORD	0.733572	0.792318	0.771399	10	10	12
Q00839-2	Isoform Short of Heterogeneous nuclear ribonucleoprotein U OS=Homo sapiens GN=HNRNPU - [HNRPU_HUMAN]	HNRNPU	1.01377	1.0268	0.994102	44	44	42
Q01081	Splicing factor U2AF 35 kDa subunit OS=Homo sapiens GN=U2AF1 PE=1 SV=3 - [U2AF1_HUMAN]	U2AF1	1.12677	1.13795	1.13791	9	8	5
Q01082	Spectrin beta chain, non-erythrocytic 1 OS=Homo sapiens GN=SPTBN1 PE=1 SV=2 - [SPTB2_HUMAN]	SPTBN1	1.26184	1.27489	1.24696	150	144	140
Q01085	Nucleolysin TIAR OS=Homo sapiens GN=TIAL1 PE=1 SV=1 - [TIAR_HUMAN]	TIAL1	0.912846	0.932439	0.814167	8	5	5
Q01105	Protein SET OS=Homo sapiens GN=SET PE=1 SV=3 - [SET_HUMAN]	SET	1.16694		1.11256	16		13
Q01130-2	Isoform 2 of Serine/arginine-rich splicing factor 2 OS=Homo sapiens GN=SRSF2 - [SRSF2_HUMAN]	SRSF2	1.11574	1.13497	1.22218	9	8	6
Q01167-2	Isoform 2 of Forkhead box protein K2 OS=Homo sapiens GN=FOXK2 - [FOXK2_HUMAN]	FOXK2		0.359232	0.830331		1	1
Q01415-2	Isoform 2 of N-acetylgalactosamine kinase OS=Homo sapiens GN=GALK2 - [GALK2_HUMAN]	GALK2	0.825736	0.993134	0.722957	4	6	2
Q01432-6	Isoform 4 of AMP deaminase 3 OS=Homo sapiens GN=AMPD3 - [AMPD3_HUMAN]	AMPD3
Q01433-2	Isoform Ex1A-2-3 of AMP deaminase 2 OS=Homo sapiens GN=AMPD2 - [AMPD2_HUMAN]	AMPD2	0.543011	0.547182		2	2
Q01469	Fatty acid-binding protein, epidermal OS=Homo sapiens GN=FABP5 PE=1 SV=3 - [FABP5_HUMAN]	FABP5	1.32212	1.34843	1.36011	13	16	13
Q01518	Adenylyl cyclase-associated protein 1 OS=Homo sapiens GN=CAP1 PE=1 SV=5 - [CAP1_HUMAN]	CAP1	1.10092	1.09339	1.10574	25	23	24
Q01581	Hydroxymethylglutaryl-CoA synthase, cytoplasmic OS=Homo sapiens GN=HMGCS1 PE=1 SV=2 - [HMCS1_HUMAN]	HMGCS1	0.537091	0.773747	0.46674	2	3	5
Q01650	Large neutral amino acids transporter small subunit 1 OS=Homo sapiens GN=SLC7A5 PE=1 SV=2 - [LAT1_HUMAN]	SLC7A5	0.840378	0.84758	0.61641	1	1	2
Q01658	Protein Dr1 OS=Homo sapiens GN=DR1 PE=1 SV=1 - [NC2B_HUMAN]	DR1	1.17743		1.6151	2		1
Q01780-2	Isoform 2 of Exosome component 10 OS=Homo sapiens GN=EXOSC10 - [EXOSX_HUMAN]	EXOSC10	0.765373	0.851325	0.892604	6	3	4
Q01804-5	Isoform 2 of OTU domain-containing protein 4 OS=Homo sapiens GN=OTUD4 - [OTUD4_HUMAN]	OTUD4	0.980429	0.911524	0.861802	2	4	3
Q01813	ATP-dependent 6-phosphofructokinase, platelet type OS=Homo sapiens GN=PFKP PE=1 SV=2 - [PFKAP_HUMAN]	PFKP	0.930366	0.966251	0.962157	27	31	24
Q01831-2	Isoform 2 of DNA repair protein complementing XP-C cells OS=Homo sapiens GN=XPC - [XPC_HUMAN]	XPC	0.702224			1
Q01844-6	Isoform 6 of RNA-binding protein EWS OS=Homo sapiens GN=EWSR1 - [EWS_HUMAN]	EWSR1	1.23013	1.27212	1.36439	7	5	5
Q01968-2	Isoform B of Inositol polyphosphate 5-phosphatase OCRL-1 OS=Homo sapiens GN=OCRL - [OCRL_HUMAN]	OCRL	1.04446	0.742593	0.872384	1	2	2
Q01970	1-phosphatidylinositol 4,5-bisphosphate phosphodiesterase beta-3 OS=Homo sapiens GN=PLCB3 PE=1 SV=2 - [PLCB3_HUMAN]	PLCB3		1.22621	0.784794		4	5
Q02218-2	Isoform 2 of 2-oxoglutarate dehydrogenase, mitochondrial OS=Homo sapiens GN=OGDH - [ODO1_HUMAN]	OGDH	1.1907		1.19291	16		16
Q02241-2	Isoform 2 of Kinesin-like protein KIF23 OS=Homo sapiens GN=KIF23 - [KIF23_HUMAN]	KIF23	1.5058	1.28297	0.960618	2	3	2
Q02252-2	Isoform 2 of Methylmalonate-semialdehyde dehydrogenase [acylating], mitochondrial OS=Homo sapiens GN=ALDH6A1 - [MMSA_HUMAN]	ALDH6A1	0.956064	1.14443	1.02863	1	2	1
Q02318	Sterol 26-hydroxylase, mitochondrial OS=Homo sapiens GN=CYP27A1 PE=1 SV=1 - [CP27A_HUMAN]	CYP27A1	0.884624	1.0542	0.889954	3	3	2
Q02539	Histone H1.1 OS=Homo sapiens GN=HIST1H1A PE=1 SV=3 - [H11_HUMAN]	HIST1H1A	0.75861	0.749928	0.735093	3	4	2
Q02543	60S ribosomal protein L18a OS=Homo sapiens GN=RPL18A PE=1 SV=2 - [RL18A_HUMAN]	RPL18A	1.04191	1.0015	1.07138	22	21	22
Q02750-2	Isoform 2 of Dual specificity mitogen-activated protein kinase kinase 1 OS=Homo sapiens GN=MAP2K1 - [MP2K1_HUMAN]	MAP2K1	0.802005	0.765758	0.889857	2	2	3
Q02790	Peptidyl-prolyl cis-trans isomerase FKBP4 OS=Homo sapiens GN=FKBP4 PE=1 SV=3 - [FKBP4_HUMAN]	FKBP4	0.944527	0.975982	0.983314	27	33	30
Q02809	Procollagen-lysine,2-oxoglutarate 5-dioxygenase 1 OS=Homo sapiens GN=PLOD1 PE=1 SV=2 - [PLOD1_HUMAN]	PLOD1	0.832827	0.933085	0.889718	17	14	16
Q02818	Nucleobindin-1 OS=Homo sapiens GN=NUCB1 PE=1 SV=4 - [NUCB1_HUMAN]	NUCB1	1.21224	1.01888	0.963474	14	11	11
Q02833-3	Isoform 3 of Ras association domain-containing protein 7 OS=Homo sapiens GN=RASSF7 - [RASF7_HUMAN]	RASSF7	0.839471	0.848635	0.463138	1	1	1
Q02878	60S ribosomal protein L6 OS=Homo sapiens GN=RPL6 PE=1 SV=3 - [RL6_HUMAN]	RPL6	1.03427	1.01888	1.06548	30	29	26
Q02880-2	Isoform Beta-1 of DNA topoisomerase 2-beta OS=Homo sapiens GN=TOP2B - [TOP2B_HUMAN]	TOP2B	0.973557	0.850786	0.722078	5	7	3
Q02952-3	Isoform 3 of A-kinase anchor protein 12 OS=Homo sapiens GN=AKAP12 - [AKA12_HUMAN]	AKAP12	1.30096	1.24802	1.3481	4	3	4
Q02978	Mitochondrial 2-oxoglutarate/malate carrier protein OS=Homo sapiens GN=SLC25A11 PE=1 SV=3 - [M2OM_HUMAN]	SLC25A11	1.03131	0.933903	0.987006	16	11	12
Q03001	Dystonin OS=Homo sapiens GN=DST PE=1 SV=4 - [DYST_HUMAN]	DST	1.06606	1.20362	1.08003	11	17	16
Q03135	Caveolin-1 OS=Homo sapiens GN=CAV1 PE=1 SV=4 - [CAV1_HUMAN]	CAV1	1.49885	1.58993	1.51239	16	17	17
Q03154-2	Isoform 2 of Aminoacylase-1 OS=Homo sapiens GN=ACY1 - [ACY1_HUMAN]	ACY1	1.43934	1.5608	1.32827	2	2	2
Q03169	Tumor necrosis factor alpha-induced protein 2 OS=Homo sapiens GN=TNFAIP2 PE=2 SV=2 - [TNAP2_HUMAN]	TNFAIP2	0.707946	0.675515	0.727057	5	4	4
Q03252	Lamin-B2 OS=Homo sapiens GN=LMNB2 PE=1 SV=3 - [LMNB2_HUMAN]	LMNB2	1.13116	1.15706	1.07601	16	17	14
Q03426	Mevalonate kinase OS=Homo sapiens GN=MVK PE=1 SV=1 - [KIME_HUMAN]	MVK		1.01004	1.23011		4	3
Q03519-2	Isoform 2 of Antigen peptide transporter 2 OS=Homo sapiens GN=TAP2 - [TAP2_HUMAN]	TAP2		1.12725	0.994756		2	1
Q03701	CCAAT/enhancer-binding protein zeta OS=Homo sapiens GN=CEBPZ PE=1 SV=3 - [CEBPZ_HUMAN]	CEBPZ	1.04887	1.09865	0.88703	8	10	10
Q04206-2	Isoform 2 of Transcription factor p65 OS=Homo sapiens GN=RELA - [TF65_HUMAN]	RELA	0.704408	0.696815	0.804469	3	4	4
Q04323	UBX domain-containing protein 1 OS=Homo sapiens GN=UBXN1 PE=1 SV=2 - [UBXN1_HUMAN]	UBXN1	1.00804	1.05787	1.32554	8	6	6
Q04446	1,4-alpha-glucan-branching enzyme OS=Homo sapiens GN=GBE1 PE=1 SV=3 - [GLGB_HUMAN]	GBE1	0.984456	0.966045	0.995575	19	24	21
Q04637-5	Isoform D of Eukaryotic translation initiation factor 4 gamma 1 OS=Homo sapiens GN=EIF4G1 - [IF4G1_HUMAN]	EIF4G1	1.00535	1.02263	0.987069	30	31	22
Q04656-5	Isoform 5 of Copper-transporting ATPase 1 OS=Homo sapiens GN=ATP7A - [ATP7A_HUMAN]	ATP7A	0.948139	1.00701	0.934607	2	2	2
Q04695	Keratin, type I cytoskeletal 17 OS=Homo sapiens GN=KRT17 PE=1 SV=2 - [K1C17_HUMAN]	KRT17
Q04724	Transducin-like enhancer protein 1 OS=Homo sapiens GN=TLE1 PE=1 SV=2 - [TLE1_HUMAN]	TLE1
Q04726-2	Isoform 2 of Transducin-like enhancer protein 3 OS=Homo sapiens GN=TLE3 - [TLE3_HUMAN]	TLE3
Q04760-2	Isoform 2 of Lactoylglutathione lyase OS=Homo sapiens GN=GLO1 - [LGUL_HUMAN]	GLO1	0.779421	0.843161	0.881493	7	10	7
Q04828	Aldo-keto reductase family 1 member C1 OS=Homo sapiens GN=AKR1C1 PE=1 SV=1 - [AK1C1_HUMAN]	AKR1C1	1.28134	1.11108	1.24564	8	9	6
Q04837	Single-stranded DNA-binding protein, mitochondrial OS=Homo sapiens GN=SSBP1 PE=1 SV=1 - [SSBP_HUMAN]	SSBP1	1.24878	1.25615	1.24975	16	12	14
Q04917	14-3-3 protein eta OS=Homo sapiens GN=YWHAH PE=1 SV=4 - [1433F_HUMAN]	YWHAH	1.12847	1.10184	1.05325	12	12	15
Q04941-2	Isoform 2 of Proteolipid protein 2 OS=Homo sapiens GN=PLP2 - [PLP2_HUMAN]	PLP2		0.943747			1
Q05048	Cleavage stimulation factor subunit 1 OS=Homo sapiens GN=CSTF1 PE=1 SV=1 - [CSTF1_HUMAN]	CSTF1	0.946693	0.994694	1.10972	5	6	3
Q05086-2	Isoform I of Ubiquitin-protein ligase E3A OS=Homo sapiens GN=UBE3A - [UBE3A_HUMAN]	UBE3A	0.864995	1.05345	0.699818	3	1	1
Q05193-3	Isoform 3 of Dynamin-1 OS=Homo sapiens GN=DNM1 - [DYN1_HUMAN]	DNM1	0.796656	0.6696	0.905865	1	3	2
Q05209	Tyrosine-protein phosphatase non-receptor type 12 OS=Homo sapiens GN=PTPN12 PE=1 SV=3 - [PTN12_HUMAN]	PTPN12	0.537321		0.507759	1		2
Q05397-7	Isoform 7 of Focal adhesion kinase 1 OS=Homo sapiens GN=PTK2 - [FAK1_HUMAN]	PTK2	0.821617		0.907889	6		6
Q05519-2	Isoform 2 of Serine/arginine-rich splicing factor 11 OS=Homo sapiens GN=SRSF11 - [SRS11_HUMAN]	SRSF11	1.02118	1.07549	0.697323	3	3	2
Q05639	Elongation factor 1-alpha 2 OS=Homo sapiens GN=EEF1A2 PE=1 SV=1 - [EF1A2_HUMAN]	EEF1A2	0.923641	0.952652	0.934531	6	4	5
Q05655	Protein kinase C delta type OS=Homo sapiens GN=PRKCD PE=1 SV=2 - [KPCD_HUMAN]	PRKCD	1.82182	1.71086	1.65068	2	3	1
Q05682-5	Isoform 5 of Caldesmon OS=Homo sapiens GN=CALD1 - [CALD1_HUMAN]	CALD1	1.19398	1.13268	1.16018	7	6	7
Q05932-3	Isoform 3 of Folylpolyglutamate synthase, mitochondrial OS=Homo sapiens GN=FPGS - [FOLC_HUMAN]	FPGS		0.602648	0.578711		1	1
Q06124-2	Isoform 2 of Tyrosine-protein phosphatase non-receptor type 11 OS=Homo sapiens GN=PTPN11 - [PTN11_HUMAN]	PTPN11	0.780133	0.799495	0.943413	14	13	11
Q06136	3-ketodihydrosphingosine reductase OS=Homo sapiens GN=KDSR PE=1 SV=1 - [KDSR_HUMAN]	KDSR	2.09235	1.86934	1.71514	2	2	1
Q06203	Amidophosphoribosyltransferase OS=Homo sapiens GN=PPAT PE=1 SV=1 - [PUR1_HUMAN]	PPAT
Q06210-2	Isoform 2 of Glutamine--fructose-6-phosphate aminotransferase [isomerizing] 1 OS=Homo sapiens GN=GFPT1 - [GFPT1_HUMAN]	GFPT1	0.979788	0.974623	0.969039	54	65	58
Q06265	Exosome complex component RRP45 OS=Homo sapiens GN=EXOSC9 PE=1 SV=3 - [EXOS9_HUMAN]	EXOSC9	0.99063	0.863309	0.907643	1	2	2
Q06323	Proteasome activator complex subunit 1 OS=Homo sapiens GN=PSME1 PE=1 SV=1 - [PSME1_HUMAN]	PSME1	1.0689	1.08784	1.11111	17	17	18
Q06481-3	Isoform 3 of Amyloid-like protein 2 OS=Homo sapiens GN=APLP2 - [APLP2_HUMAN]	APLP2	1.06614	0.78503	1.1443	3	5	3
Q06546	GA-binding protein alpha chain OS=Homo sapiens GN=GABPA PE=1 SV=1 - [GABPA_HUMAN]	GABPA	0.352764	0.399019	0.544917	2	1	1
Q06587	E3 ubiquitin-protein ligase RING1 OS=Homo sapiens GN=RING1 PE=1 SV=2 - [RING1_HUMAN]	RING1			1.0442			2
Q06787-8	Isoform 8 of Fragile X mental retardation protein 1 OS=Homo sapiens GN=FMR1 - [FMR1_HUMAN]	FMR1	1.11418	0.902146	0.972495	4	4	3
Q06830	Peroxiredoxin-1 OS=Homo sapiens GN=PRDX1 PE=1 SV=1 - [PRDX1_HUMAN]	PRDX1	1.14051	1.11582	1.15144	44	45	49
Q07020	60S ribosomal protein L18 OS=Homo sapiens GN=RPL18 PE=1 SV=2 - [RL18_HUMAN]	RPL18	1.02147	1.03294	1.0369	16	18	19
Q07021	Complement component 1 Q subcomponent-binding protein, mitochondrial OS=Homo sapiens GN=C1QBP PE=1 SV=1 - [C1QBP_HUMAN]	C1QBP	1.21846	1.18385	1.14701	16	14	14
Q07065	Cytoskeleton-associated protein 4 OS=Homo sapiens GN=CKAP4 PE=1 SV=2 - [CKAP4_HUMAN]	CKAP4	0.994677	0.983499	0.950988	41	38	36
Q07157	Tight junction protein ZO-1 OS=Homo sapiens GN=TJP1 PE=1 SV=3 - [ZO1_HUMAN]	TJP1	0.863003		1.03127	11		12
Q07666-2	Isoform 2 of KH domain-containing, RNA-binding, signal transduction-associated protein 1 OS=Homo sapiens GN=KHDRBS1 - [KHDR1_HUMAN]	KHDRBS1	1.08508	1.08773	0.932073	11	12	12
Q07812-5	Isoform Epsilon of Apoptosis regulator BAX OS=Homo sapiens GN=BAX - [BAX_HUMAN]	BAX	2.0424	1.44709	1.06568	2	6	3
Q07866-8	Isoform S of Kinesin light chain 1 OS=Homo sapiens GN=KLC1 - [KLC1_HUMAN]	KLC1	0.779514	0.839405	0.907536	8	8	6
Q07954	Prolow-density lipoprotein receptor-related protein 1 OS=Homo sapiens GN=LRP1 PE=1 SV=2 - [LRP1_HUMAN]	LRP1	0.690873	0.842283	0.732906	9	10	9
Q07955-3	Isoform ASF-3 of Serine/arginine-rich splicing factor 1 OS=Homo sapiens GN=SRSF1 - [SRSF1_HUMAN]	SRSF1	1.08273	1.00568	1.13734	15	14	11
Q07960	Rho GTPase-activating protein 1 OS=Homo sapiens GN=ARHGAP1 PE=1 SV=1 - [RHG01_HUMAN]	ARHGAP1	0.941726	1.01163	1.01602	13	14	16
Q07973-3	Isoform 3 of 1,25-dihydroxyvitamin D(3) 24-hydroxylase, mitochondrial OS=Homo sapiens GN=CYP24A1 - [CP24A_HUMAN]	CYP24A1	0.741349	0.712379	0.860328	3	2	2
Q08170	Serine/arginine-rich splicing factor 4 OS=Homo sapiens GN=SRSF4 PE=1 SV=2 - [SRSF4_HUMAN]	SRSF4		1.17861	1.35446		1	1
Q08209-5	Isoform 5 of Serine/threonine-protein phosphatase 2B catalytic subunit alpha isoform OS=Homo sapiens GN=PPP3CA - [PP2BA_HUMAN]	PPP3CA		1.20183	0.901135		1	1
Q08211	ATP-dependent RNA helicase A OS=Homo sapiens GN=DHX9 PE=1 SV=4 - [DHX9_HUMAN]	DHX9	1.0264	1.05219	1.04014	56	58	51
Q08257	Quinone oxidoreductase OS=Homo sapiens GN=CRYZ PE=1 SV=1 - [QOR_HUMAN]	CRYZ			1.1462			9
Q08378-2	Isoform 2 of Golgin subfamily A member 3 OS=Homo sapiens GN=GOLGA3 - [GOGA3_HUMAN]	GOLGA3	1.11698	0.905517	1.08862	12	7	11
Q08379-2	Isoform 2 of Golgin subfamily A member 2 OS=Homo sapiens GN=GOLGA2 - [GOGA2_HUMAN]	GOLGA2			0.811719			3
Q08380	Galectin-3-binding protein OS=Homo sapiens GN=LGALS3BP PE=1 SV=1 - [LG3BP_HUMAN]	LGALS3BP	1.3917	1.47482	1.41634	17	17	17
Q08426	Peroxisomal bifunctional enzyme OS=Homo sapiens GN=EHHADH PE=1 SV=3 - [ECHP_HUMAN]	EHHADH	1.22836	1.13203	1.20807	6	3	5
Q08623-3	Isoform 3 of Pseudouridine-5'-phosphatase OS=Homo sapiens GN=HDHD1 - [HDHD1_HUMAN]	HDHD1	1.30527	1.17324	1.05131	1	1	1
Q08722-2	Isoform OA3-293 of Leukocyte surface antigen CD47 OS=Homo sapiens GN=CD47 - [CD47_HUMAN]	CD47			0.931704			1
Q08752	Peptidyl-prolyl cis-trans isomerase D OS=Homo sapiens GN=PPID PE=1 SV=3 - [PPID_HUMAN]	PPID	0.932239	0.840934	0.833353	6	7	7
Q08945	FACT complex subunit SSRP1 OS=Homo sapiens GN=SSRP1 PE=1 SV=1 - [SSRP1_HUMAN]	SSRP1	0.973363	1.05533	0.965092	15	17	14
Q08AE8-2	Isoform 2 of Protein spire homolog 1 OS=Homo sapiens GN=SPIRE1 - [SPIR1_HUMAN]	SPIRE1	1.01974		1.33151	1		1
Q08AM6	Protein VAC14 homolog OS=Homo sapiens GN=VAC14 PE=1 SV=1 - [VAC14_HUMAN]	VAC14	1.00888	0.910791	1.12332	4	4	4
Q08J23-2	Isoform 2 of tRNA (cytosine(34)-C(5))-methyltransferase OS=Homo sapiens GN=NSUN2 - [NSUN2_HUMAN]	NSUN2	0.956172	0.944854	0.91759	16	14	15
Q09028-4	Isoform 4 of Histone-binding protein RBBP4 OS=Homo sapiens GN=RBBP4 - [RBBP4_HUMAN]	RBBP4	1.24944	1.11566	1.15005	3	2	1
Q09161	Nuclear cap-binding protein subunit 1 OS=Homo sapiens GN=NCBP1 PE=1 SV=1 - [NCBP1_HUMAN]	NCBP1	0.928785	1.03118	1.18999	10	7	10
Q09428	ATP-binding cassette sub-family C member 8 OS=Homo sapiens GN=ABCC8 PE=1 SV=6 - [ABCC8_HUMAN]	ABCC8
Q09666	Neuroblast differentiation-associated protein AHNAK OS=Homo sapiens GN=AHNAK PE=1 SV=2 - [AHNK_HUMAN]	AHNAK	0.872689	0.885455	0.877729	365	376	385
Q0VDF9	Heat shock 70 kDa protein 14 OS=Homo sapiens GN=HSPA14 PE=1 SV=1 - [HSP7E_HUMAN]	HSPA14	0.957078	1.3107	1.12612	2	2	2
Q0VDG4-2	Isoform 2 of Secernin-3 OS=Homo sapiens GN=SCRN3 - [SCRN3_HUMAN]	SCRN3	1.07157	0.643313	0.630792	2	2	1
Q0VGL1	Ragulator complex protein LAMTOR4 OS=Homo sapiens GN=LAMTOR4 PE=1 SV=1 - [LTOR4_HUMAN]	LAMTOR4	1.47287	1.53006	1.27865	1	1	1
Q10471	Polypeptide N-acetylgalactosaminyltransferase 2 OS=Homo sapiens GN=GALNT2 PE=1 SV=1 - [GALT2_HUMAN]	GALNT2	0.857966	1.04378	0.853871	8	4	7
Q10472	Polypeptide N-acetylgalactosaminyltransferase 1 OS=Homo sapiens GN=GALNT1 PE=1 SV=1 - [GALT1_HUMAN]	GALNT1	0.679129	0.586892		1	1
Q10567-4	Isoform 4 of AP-1 complex subunit beta-1 OS=Homo sapiens GN=AP1B1 - [AP1B1_HUMAN]	AP1B1			0.845363			6
Q10570	Cleavage and polyadenylation specificity factor subunit 1 OS=Homo sapiens GN=CPSF1 PE=1 SV=2 - [CPSF1_HUMAN]	CPSF1	0.927058	1.13879	0.979089	7	7	7
Q10713	Mitochondrial-processing peptidase subunit alpha OS=Homo sapiens GN=PMPCA PE=1 SV=2 - [MPPA_HUMAN]	PMPCA	1.06785	1.07825	1.07138	8	6	12
Q12768	WASH complex subunit strumpellin OS=Homo sapiens GN=KIAA0196 PE=1 SV=1 - [STRUM_HUMAN]	KIAA0196	1.06375	0.843441	0.924294	9	14	7
Q12769	Nuclear pore complex protein Nup160 OS=Homo sapiens GN=NUP160 PE=1 SV=3 - [NU160_HUMAN]	NUP160	0.880019	1.09334	0.824833	8	6	7
Q12788	Transducin beta-like protein 3 OS=Homo sapiens GN=TBL3 PE=1 SV=2 - [TBL3_HUMAN]	TBL3	1.04069	0.954325	1.05643	7	10	8
Q12789-3	Isoform 2 of General transcription factor 3C polypeptide 1 OS=Homo sapiens GN=GTF3C1 - [TF3C1_HUMAN]	GTF3C1	0.832931	0.978483	1.10405	6	7	8
Q12792	Twinfilin-1 OS=Homo sapiens GN=TWF1 PE=1 SV=3 - [TWF1_HUMAN]	TWF1	0.997012	0.90115	0.989054	14	14	15
Q12797-10	Isoform 10 of Aspartyl/asparaginyl beta-hydroxylase OS=Homo sapiens GN=ASPH - [ASPH_HUMAN]	ASPH	0.892322	0.886796	0.889592	38	34	39
Q12800-3	Isoform 3 of Alpha-globin transcription factor CP2 OS=Homo sapiens GN=TFCP2 - [TFCP2_HUMAN]	TFCP2			1.05812			2
Q12802-4	Isoform 3 of A-kinase anchor protein 13 OS=Homo sapiens GN=AKAP13 - [AKP13_HUMAN]	AKAP13	1.11237	0.921256	1.14935	3	10	5
Q12824-2	Isoform B of SWI/SNF-related matrix-associated actin-dependent regulator of chromatin subfamily B member 1 OS=Homo sapiens GN=SMARCB1 - [SNF5_HUMAN]	SMARCB1	2.46995	1.02934	1.16107	3	3	2
Q12846	Syntaxin-4 OS=Homo sapiens GN=STX4 PE=1 SV=2 - [STX4_HUMAN]	STX4	1.00377	0.911242	1.2178	4	4	3
Q12849	G-rich sequence factor 1 OS=Homo sapiens GN=GRSF1 PE=1 SV=3 - [GRSF1_HUMAN]	GRSF1			0.845838			2
Q12864	Cadherin-17 OS=Homo sapiens GN=CDH17 PE=2 SV=3 - [CAD17_HUMAN]	CDH17	1.67229	1.85423	1.57704	1	1	3
Q12874	Splicing factor 3A subunit 3 OS=Homo sapiens GN=SF3A3 PE=1 SV=1 - [SF3A3_HUMAN]	SF3A3	1.10966	1.09864	1.0659	10	9	10
Q12888	Tumor suppressor p53-binding protein 1 OS=Homo sapiens GN=TP53BP1 PE=1 SV=2 - [TP53B_HUMAN]	TP53BP1	1.24175	1.21095	1.04176	6	6	8
Q12894	Interferon-related developmental regulator 2 OS=Homo sapiens GN=IFRD2 PE=1 SV=3 - [IFRD2_HUMAN]	IFRD2
Q12899	Tripartite motif-containing protein 26 OS=Homo sapiens GN=TRIM26 PE=1 SV=1 - [TRI26_HUMAN]	TRIM26		1.26492	0.762077		1	1
Q12904	Aminoacyl tRNA synthase complex-interacting multifunctional protein 1 OS=Homo sapiens GN=AIMP1 PE=1 SV=2 - [AIMP1_HUMAN]	AIMP1	0.952055	0.931827	0.882977	13	11	12
Q12905	Interleukin enhancer-binding factor 2 OS=Homo sapiens GN=ILF2 PE=1 SV=2 - [ILF2_HUMAN]	ILF2	1.03722	1.05774	1.06474	34	30	33
Q12906-5	Isoform 5 of Interleukin enhancer-binding factor 3 OS=Homo sapiens GN=ILF3 - [ILF3_HUMAN]	ILF3			1.09232			44
Q12907	Vesicular integral-membrane protein VIP36 OS=Homo sapiens GN=LMAN2 PE=1 SV=1 - [LMAN2_HUMAN]	LMAN2	0.961664	1.0105	1.08545	9	7	6
Q12929	Epidermal growth factor receptor kinase substrate 8 OS=Homo sapiens GN=EPS8 PE=1 SV=1 - [EPS8_HUMAN]	EPS8	0.854314	0.898531	0.89569	12	11	11
Q12931-2	Isoform 2 of Heat shock protein 75 kDa, mitochondrial OS=Homo sapiens GN=TRAP1 - [TRAP1_HUMAN]	TRAP1	1.12321	1.17556	1.16533	27	27	31
Q12955-6	Isoform 4 of Ankyrin-3 OS=Homo sapiens GN=ANK3 - [ANK3_HUMAN]	ANK3	1.5758	1.38366	1.52751	1	2	1
Q12959-5	Isoform 5 of Disks large homolog 1 OS=Homo sapiens GN=DLG1 - [DLG1_HUMAN]	DLG1	0.789284	1.12365	0.786579	4	2	5
Q12962	Transcription initiation factor TFIID subunit 10 OS=Homo sapiens GN=TAF10 PE=1 SV=1 - [TAF10_HUMAN]	TAF10	0.620568	0.912715	0.988971	3	1	3
Q12965	Unconventional myosin-Ie OS=Homo sapiens GN=MYO1E PE=1 SV=2 - [MYO1E_HUMAN]	MYO1E	1.09722	0.911776	1.08807	7	6	10
Q12972	Nuclear inhibitor of protein phosphatase 1 OS=Homo sapiens GN=PPP1R8 PE=1 SV=2 - [PP1R8_HUMAN]	PPP1R8	0.696298	0.970351	0.851603	4	6	4
Q12974	Protein tyrosine phosphatase type IVA 2 OS=Homo sapiens GN=PTP4A2 PE=1 SV=1 - [TP4A2_HUMAN]	PTP4A2			0.99776			3
Q12979-4	Isoform 4 of Active breakpoint cluster region-related protein OS=Homo sapiens GN=ABR - [ABR_HUMAN]	ABR	1.23152		0.638943	1		2
Q12981-2	Isoform 2 of Vesicle transport protein SEC20 OS=Homo sapiens GN=BNIP1 - [SEC20_HUMAN]	BNIP1	1.10196	1.21321	1.02123	1	1	1
Q12986-2	Isoform 2 of Transcriptional repressor NF-X1 OS=Homo sapiens GN=NFX1 - [NFX1_HUMAN]	NFX1	0.820325		0.970324	2		2
Q12996	Cleavage stimulation factor subunit 3 OS=Homo sapiens GN=CSTF3 PE=1 SV=1 - [CSTF3_HUMAN]	CSTF3	1.30798	1.28802	1.49731	6	5	7
Q13011	Delta(3,5)-Delta(2,4)-dienoyl-CoA isomerase, mitochondrial OS=Homo sapiens GN=ECH1 PE=1 SV=2 - [ECH1_HUMAN]	ECH1	1.45285	1.48328	1.50548	31	27	38
Q13017-2	Isoform 2 of Rho GTPase-activating protein 5 OS=Homo sapiens GN=ARHGAP5 - [RHG05_HUMAN]	ARHGAP5	1.287	0.860572	2.15061	3	1	1
Q13033-2	Isoform Alpha of Striatin-3 OS=Homo sapiens GN=STRN3 - [STRN3_HUMAN]	STRN3			0.832089			1
Q13042-4	Isoform 4 of Cell division cycle protein 16 homolog OS=Homo sapiens GN=CDC16 - [CDC16_HUMAN]	CDC16		0.252246	1.18078		1	3
Q13043	Serine/threonine-protein kinase 4 OS=Homo sapiens GN=STK4 PE=1 SV=2 - [STK4_HUMAN]	STK4		0.64231	0.947985		3	2
Q13045	Protein flightless-1 homolog OS=Homo sapiens GN=FLII PE=1 SV=2 - [FLII_HUMAN]	FLII
Q13045-2	Isoform 2 of Protein flightless-1 homolog OS=Homo sapiens GN=FLII - [FLII_HUMAN]	FLII		0.895772	3.63293		22	1
Q13049	E3 ubiquitin-protein ligase TRIM32 OS=Homo sapiens GN=TRIM32 PE=1 SV=2 - [TRI32_HUMAN]	TRIM32	1.01392	0.90909	1.01669	1	1	1
Q13057	Bifunctional coenzyme A synthase OS=Homo sapiens GN=COASY PE=1 SV=4 - [COASY_HUMAN]	COASY	0.736729	0.793907	0.864716	7	7	4
Q13084	39S ribosomal protein L28, mitochondrial OS=Homo sapiens GN=MRPL28 PE=1 SV=4 - [RM28_HUMAN]	MRPL28	1.11199	1.12154	1.13782	4	4	2
Q13085	Acetyl-CoA carboxylase 1 OS=Homo sapiens GN=ACACA PE=1 SV=2 - [ACACA_HUMAN]	ACACA	0.853957	0.860908	0.83192	29	31	35
Q13098-5	Isoform 4 of COP9 signalosome complex subunit 1 OS=Homo sapiens GN=GPS1 - [CSN1_HUMAN]	GPS1	0.998134	0.971915	0.88933	5	7	6
Q13112	Chromatin assembly factor 1 subunit B OS=Homo sapiens GN=CHAF1B PE=1 SV=1 - [CAF1B_HUMAN]	CHAF1B	0.915289	1.06163	1.17751	2	2	1
Q13123	Protein Red OS=Homo sapiens GN=IK PE=1 SV=3 - [RED_HUMAN]	IK	0.9411	0.906241	1.04263	1	1	2
Q13126-4	Isoform 4 of S-methyl-5'-thioadenosine phosphorylase OS=Homo sapiens GN=MTAP - [MTAP_HUMAN]	MTAP	1.14902	1.08763	0.972493	9	8	10
Q13131	5'-AMP-activated protein kinase catalytic subunit alpha-1 OS=Homo sapiens GN=PRKAA1 PE=1 SV=4 - [AAPK1_HUMAN]	PRKAA1	0.939449	1.03315	1.09876	8	7	7
Q13136-2	Isoform 2 of Liprin-alpha-1 OS=Homo sapiens GN=PPFIA1 - [LIPA1_HUMAN]	PPFIA1			0.766294			2
Q13144	Translation initiation factor eIF-2B subunit epsilon OS=Homo sapiens GN=EIF2B5 PE=1 SV=3 - [EI2BE_HUMAN]	EIF2B5	0.71845	0.520598	0.618189	4	4	3
Q13148	TAR DNA-binding protein 43 OS=Homo sapiens GN=TARDBP PE=1 SV=1 - [TADBP_HUMAN]	TARDBP	1.00362	1.05983	1.04319	9	10	10
Q13151	Heterogeneous nuclear ribonucleoprotein A0 OS=Homo sapiens GN=HNRNPA0 PE=1 SV=1 - [ROA0_HUMAN]	HNRNPA0	0.929811	0.96231	1.1893	5	5	5
Q13153	Serine/threonine-protein kinase PAK 1 OS=Homo sapiens GN=PAK1 PE=1 SV=2 - [PAK1_HUMAN]	PAK1	0.92619	0.663428	0.813857	2	2	1
Q13155	Aminoacyl tRNA synthase complex-interacting multifunctional protein 2 OS=Homo sapiens GN=AIMP2 PE=1 SV=2 - [AIMP2_HUMAN]	AIMP2	1.00314	0.908865	0.920678	7	7	7
Q13158	FAS-associated death domain protein OS=Homo sapiens GN=FADD PE=1 SV=1 - [FADD_HUMAN]	FADD	1.04752	1.0451	1.01122	5	7	3
Q13162	Peroxiredoxin-4 OS=Homo sapiens GN=PRDX4 PE=1 SV=1 - [PRDX4_HUMAN]	PRDX4	0.933804	0.92625	0.932247	15	15	16
Q13177	Serine/threonine-protein kinase PAK 2 OS=Homo sapiens GN=PAK2 PE=1 SV=3 - [PAK2_HUMAN]	PAK2	0.945372	0.899497	0.972502	10	13	11
Q13185	Chromobox protein homolog 3 OS=Homo sapiens GN=CBX3 PE=1 SV=4 - [CBX3_HUMAN]	CBX3	1.22493	1.31628	1.23147	5	2	5
Q13188	Serine/threonine-protein kinase 3 OS=Homo sapiens GN=STK3 PE=1 SV=2 - [STK3_HUMAN]	STK3	0.751904	0.942513	1.1246	2	2	3
Q13190-3	Isoform 3 of Syntaxin-5 OS=Homo sapiens GN=STX5 - [STX5_HUMAN]	STX5	1.46553	0.904457	0.600887	2	1	3
Q13200	26S proteasome non-ATPase regulatory subunit 2 OS=Homo sapiens GN=PSMD2 PE=1 SV=3 - [PSMD2_HUMAN]	PSMD2	0.938974	0.907199	0.96306	46	47	46
Q13206	Probable ATP-dependent RNA helicase DDX10 OS=Homo sapiens GN=DDX10 PE=1 SV=2 - [DDX10_HUMAN]	DDX10	1.05661	1.20359	0.989849	1	1	1
Q13217	DnaJ homolog subfamily C member 3 OS=Homo sapiens GN=DNAJC3 PE=1 SV=1 - [DNJC3_HUMAN]	DNAJC3	1.85811		1.17501	1		1
Q13228	Selenium-binding protein 1 OS=Homo sapiens GN=SELENBP1 PE=1 SV=2 - [SBP1_HUMAN]	SELENBP1	0.726065	0.782369	0.746362	8	14	11
Q13242	Serine/arginine-rich splicing factor 9 OS=Homo sapiens GN=SRSF9 PE=1 SV=1 - [SRSF9_HUMAN]	SRSF9	0.854275	0.866479	0.845295	7	7	4
Q13243	Serine/arginine-rich splicing factor 5 OS=Homo sapiens GN=SRSF5 PE=1 SV=1 - [SRSF5_HUMAN]	SRSF5	1.05808	1.2739	1.32258	2	4	4
Q13247-3	Isoform SRP55-3 of Serine/arginine-rich splicing factor 6 OS=Homo sapiens GN=SRSF6 - [SRSF6_HUMAN]	SRSF6	1.00859	1.00401	1.06162	4	5	5
Q13257	Mitotic spindle assembly checkpoint protein MAD2A OS=Homo sapiens GN=MAD2L1 PE=1 SV=1 - [MD2L1_HUMAN]	MAD2L1		0.956384	0.689477		2	3
Q13263	Transcription intermediary factor 1-beta OS=Homo sapiens GN=TRIM28 PE=1 SV=5 - [TIF1B_HUMAN]	TRIM28	1.20727	1.22554	1.18088	28	26	26
Q13277-2	Isoform B of Syntaxin-3 OS=Homo sapiens GN=STX3 - [STX3_HUMAN]	STX3	1.35029	1.39892	1.66231	2	3	2
Q13283	Ras GTPase-activating protein-binding protein 1 OS=Homo sapiens GN=G3BP1 PE=1 SV=1 - [G3BP1_HUMAN]	G3BP1	1.10744	1.08168	1.10563	10	15	16
Q13287	N-myc-interactor OS=Homo sapiens GN=NMI PE=1 SV=2 - [NMI_HUMAN]	NMI	0.61989		0.770678	2		2
Q13303-4	Isoform 4 of Voltage-gated potassium channel subunit beta-2 OS=Homo sapiens GN=KCNAB2 - [KCAB2_HUMAN]	KCNAB2		1.2204	1.3971		2	2
Q13310-2	Isoform 2 of Polyadenylate-binding protein 4 OS=Homo sapiens GN=PABPC4 - [PABP4_HUMAN]	PABPC4	1.01175	0.972095	0.94807	10	12	10
Q13315	Serine-protein kinase ATM OS=Homo sapiens GN=ATM PE=1 SV=4 - [ATM_HUMAN]	ATM	0.50805	0.764026	0.629031	1	1	1
Q13330-3	Isoform 3 of Metastasis-associated protein MTA1 OS=Homo sapiens GN=MTA1 - [MTA1_HUMAN]	MTA1			0.812023			1
Q13347	Eukaryotic translation initiation factor 3 subunit I OS=Homo sapiens GN=EIF3I PE=1 SV=1 - [EIF3I_HUMAN]	EIF3I	0.976114	0.897674	1.00871	13	16	12
Q13395	Probable methyltransferase TARBP1 OS=Homo sapiens GN=TARBP1 PE=1 SV=1 - [TARB1_HUMAN]	TARBP1	0.81826	0.746619		1	1
Q13404-8	Isoform 6 of Ubiquitin-conjugating enzyme E2 variant 1 OS=Homo sapiens GN=UBE2V1 - [UB2V1_HUMAN]	UBE2V1			0.737077			2
Q13405	39S ribosomal protein L49, mitochondrial OS=Homo sapiens GN=MRPL49 PE=1 SV=1 - [RM49_HUMAN]	MRPL49	1.06225	1.04156	1.10962	2	2	2
Q13409-6	Isoform 2F of Cytoplasmic dynein 1 intermediate chain 2 OS=Homo sapiens GN=DYNC1I2 - [DC1I2_HUMAN]	DYNC1I2			0.901039			3
Q13418	Integrin-linked protein kinase OS=Homo sapiens GN=ILK PE=1 SV=2 - [ILK_HUMAN]	ILK	0.909758	0.792629	0.779494	7	5	8
Q13423	NAD(P) transhydrogenase, mitochondrial OS=Homo sapiens GN=NNT PE=1 SV=3 - [NNTM_HUMAN]	NNT	1.28134	1.29815	1.42695	9	9	11
Q13425-2	Isoform 2 of Beta-2-syntrophin OS=Homo sapiens GN=SNTB2 - [SNTB2_HUMAN]	SNTB2			0.949804			1
Q13427-2	Isoform 2 of Peptidyl-prolyl cis-trans isomerase G OS=Homo sapiens GN=PPIG - [PPIG_HUMAN]	PPIG	0.918736	0.948438	1.20392	4	2	4
Q13428-2	Isoform 2 of Treacle protein OS=Homo sapiens GN=TCOF1 - [TCOF_HUMAN]	TCOF1	1.23704	1.09272	1.24379	9	9	8
Q13435	Splicing factor 3B subunit 2 OS=Homo sapiens GN=SF3B2 PE=1 SV=2 - [SF3B2_HUMAN]	SF3B2	0.925064	1.09696	0.942245	13	12	14
Q13439-3	Isoform 3 of Golgin subfamily A member 4 OS=Homo sapiens GN=GOLGA4 - [GOGA4_HUMAN]	GOLGA4			0.534809			5
Q13442	28 kDa heat- and acid-stable phosphoprotein OS=Homo sapiens GN=PDAP1 PE=1 SV=1 - [HAP28_HUMAN]	PDAP1	1.04573	1.07949	1.06802	8	8	7
Q13443-2	Isoform 2 of Disintegrin and metalloproteinase domain-containing protein 9 OS=Homo sapiens GN=ADAM9 - [ADAM9_HUMAN]	ADAM9	0.691985	0.857189	0.885039	2	1	1
Q13444-11	Isoform 11 of Disintegrin and metalloproteinase domain-containing protein 15 OS=Homo sapiens GN=ADAM15 - [ADA15_HUMAN]	ADAM15	0.888024	0.832756	0.97034	2	2	1
Q13445	Transmembrane emp24 domain-containing protein 1 OS=Homo sapiens GN=TMED1 PE=1 SV=1 - [TMED1_HUMAN]	TMED1	0.622664	0.606937	0.655853	1	1	1
Q13451	Peptidyl-prolyl cis-trans isomerase FKBP5 OS=Homo sapiens GN=FKBP5 PE=1 SV=2 - [FKBP5_HUMAN]	FKBP5	0.591403	0.719918	0.471933	2	1	2
Q13464	Rho-associated protein kinase 1 OS=Homo sapiens GN=ROCK1 PE=1 SV=1 - [ROCK1_HUMAN]	ROCK1	0.734775	0.6183	0.712925	1	1	2
Q13469-5	Isoform 5 of Nuclear factor of activated T-cells, cytoplasmic 2 OS=Homo sapiens GN=NFATC2 - [NFAC2_HUMAN]	NFATC2		1.08557	0.991029		1	1
Q13485	Mothers against decapentaplegic homolog 4 OS=Homo sapiens GN=SMAD4 PE=1 SV=1 - [SMAD4_HUMAN]	SMAD4			0.526141			1
Q13488	V-type proton ATPase 116 kDa subunit a isoform 3 OS=Homo sapiens GN=TCIRG1 PE=1 SV=3 - [VPP3_HUMAN]	TCIRG1	2.82816	1.77284	1.11882	2	3	1
Q13492-3	Isoform 3 of Phosphatidylinositol-binding clathrin assembly protein OS=Homo sapiens GN=PICALM - [PICAL_HUMAN]	PICALM		0.93872	0.880912		7	5
Q13496	Myotubularin OS=Homo sapiens GN=MTM1 PE=1 SV=2 - [MTM1_HUMAN]	MTM1	0.863757	0.912814	0.842785	4	5	5
Q13501	Sequestosome-1 OS=Homo sapiens GN=SQSTM1 PE=1 SV=1 - [SQSTM_HUMAN]	SQSTM1	1.27604	1.24783	1.70273	43	42	17
Q13501-2	Isoform 2 of Sequestosome-1 OS=Homo sapiens GN=SQSTM1 - [SQSTM_HUMAN]	SQSTM1			2.04947			1
Q13505-3	Isoform 3 of Metaxin-1 OS=Homo sapiens GN=MTX1 - [MTX1_HUMAN]	MTX1	0.930713	1.25845	1.36528	2	3	3
Q13509	Tubulin beta-3 chain OS=Homo sapiens GN=TUBB3 PE=1 SV=2 - [TBB3_HUMAN]	TUBB3	0.889149	0.972884	0.945728	12	10	12
Q13510	Acid ceramidase OS=Homo sapiens GN=ASAH1 PE=1 SV=5 - [ASAH1_HUMAN]	ASAH1	1.62181	1.71783	1.65127	7	6	6
Q13523	Serine/threonine-protein kinase PRP4 homolog OS=Homo sapiens GN=PRPF4B PE=1 SV=3 - [PRP4B_HUMAN]	PRPF4B	1.12406	0.95111	1.13876	6	6	5
Q13526	Peptidyl-prolyl cis-trans isomerase NIMA-interacting 1 OS=Homo sapiens GN=PIN1 PE=1 SV=1 - [PIN1_HUMAN]	PIN1	1.07185	0.889849	0.948136	1	2	2
Q13541	Eukaryotic translation initiation factor 4E-binding protein 1 OS=Homo sapiens GN=EIF4EBP1 PE=1 SV=3 - [4EBP1_HUMAN]	EIF4EBP1	0.99173		0.721869	2		3
Q13546	Receptor-interacting serine/threonine-protein kinase 1 OS=Homo sapiens GN=RIPK1 PE=1 SV=3 - [RIPK1_HUMAN]	RIPK1			0.196034			1
Q13547	Histone deacetylase 1 OS=Homo sapiens GN=HDAC1 PE=1 SV=1 - [HDAC1_HUMAN]	HDAC1	0.87986	0.998875	0.936636	6	8	7
Q13555-10	Isoform 10 of Calcium/calmodulin-dependent protein kinase type II subunit gamma OS=Homo sapiens GN=CAMK2G - [KCC2G_HUMAN]	CAMK2G		0.969982	1.25853		1	1
Q13557-12	Isoform Delta 12 of Calcium/calmodulin-dependent protein kinase type II subunit delta OS=Homo sapiens GN=CAMK2D - [KCC2D_HUMAN]	CAMK2D	1.09687	1.12147	1.06679	9	5	7
Q13561	Dynactin subunit 2 OS=Homo sapiens GN=DCTN2 PE=1 SV=4 - [DCTN2_HUMAN]	DCTN2	1.01015	1.1118	0.980403	12	13	10
Q13564-3	Isoform 3 of NEDD8-activating enzyme E1 regulatory subunit OS=Homo sapiens GN=NAE1 - [ULA1_HUMAN]	NAE1	0.9083	0.947924	0.933079	4	5	6
Q13572	Inositol-tetrakisphosphate 1-kinase OS=Homo sapiens GN=ITPK1 PE=1 SV=2 - [ITPK1_HUMAN]	ITPK1	0.788155	0.849694	1.02279	3	2	1
Q13573	SNW domain-containing protein 1 OS=Homo sapiens GN=SNW1 PE=1 SV=1 - [SNW1_HUMAN]	SNW1	0.79534	0.717607	0.905689	4	7	8
Q13576	Ras GTPase-activating-like protein IQGAP2 OS=Homo sapiens GN=IQGAP2 PE=1 SV=4 - [IQGA2_HUMAN]	IQGAP2	0.311505	0.704	0.860092	1	3	2
Q13586	Stromal interaction molecule 1 OS=Homo sapiens GN=STIM1 PE=1 SV=3 - [STIM1_HUMAN]	STIM1	1.15735	1.05967	1.09808	8	10	9
Q13595-4	Isoform 4 of Transformer-2 protein homolog alpha OS=Homo sapiens GN=TRA2A - [TRA2A_HUMAN]	TRA2A	0.983698		1.22902	3		4
Q13596-2	Isoform 1A of Sorting nexin-1 OS=Homo sapiens GN=SNX1 - [SNX1_HUMAN]	SNX1	1.21444	1.38277	0.881115	7	7	9
Q13601-2	Isoform 2 of KRR1 small subunit processome component homolog OS=Homo sapiens GN=KRR1 - [KRR1_HUMAN]	KRR1	1.16482	1.09576	1.16324	4	6	7
Q13613-2	Isoform 1A of Myotubularin-related protein 1 OS=Homo sapiens GN=MTMR1 - [MTMR1_HUMAN]	MTMR1		0.667047			1
Q13616	Cullin-1 OS=Homo sapiens GN=CUL1 PE=1 SV=2 - [CUL1_HUMAN]	CUL1	0.927274	0.970717	1.08487	9	9	8
Q13617	Cullin-2 OS=Homo sapiens GN=CUL2 PE=1 SV=2 - [CUL2_HUMAN]	CUL2	0.868763	0.827656	0.839561	6	4	4
Q13618-2	Isoform 2 of Cullin-3 OS=Homo sapiens GN=CUL3 - [CUL3_HUMAN]	CUL3	1.04365	0.937844	0.95174	7	11	9
Q13619-2	Isoform 2 of Cullin-4A OS=Homo sapiens GN=CUL4A - [CUL4A_HUMAN]	CUL4A
Q13620-1	Isoform 2 of Cullin-4B OS=Homo sapiens GN=CUL4B - [CUL4B_HUMAN]	CUL4B	0.940655	0.987399	1.03471	7	8	7
Q13625-2	Isoform 2 of Apoptosis-stimulating of p53 protein 2 OS=Homo sapiens GN=TP53BP2 - [ASPP2_HUMAN]	TP53BP2
Q13627-3	Isoform 2 of Dual specificity tyrosine-phosphorylation-regulated kinase 1A OS=Homo sapiens GN=DYRK1A - [DYR1A_HUMAN]	DYRK1A		1.04585	0.983884		1	1
Q13630	GDP-L-fucose synthase OS=Homo sapiens GN=TSTA3 PE=1 SV=1 - [FCL_HUMAN]	TSTA3
Q13637	Ras-related protein Rab-32 OS=Homo sapiens GN=RAB32 PE=1 SV=3 - [RAB32_HUMAN]	RAB32	1.61701	1.3382	1.62902	3	3	4
Q13641	Trophoblast glycoprotein OS=Homo sapiens GN=TPBG PE=1 SV=1 - [TPBG_HUMAN]	TPBG	0.837612	1.01278	1.05127	2	2	2
Q13642-1	Isoform 1 of Four and a half LIM domains protein 1 OS=Homo sapiens GN=FHL1 - [FHL1_HUMAN]	FHL1	0.531248	1.05982		2	2
[truncated: 3,179 more rows]
